# Supplementary material for: Synthesis and structure of Pd(ii) pincer complexes: catalytic application in β-alkylation of secondary alcohols involving sequential dehydrogenation of alcohols via the borrowing hydrogen approach
Source: Royal Society of Chemistry journal article supplement (doi:10.1039/d3dt01628e), 2023-01-01
Supplement: d3dt01628e1.pdf [file d3dt01628e1.pdf]

## Supporting Information

### Supporting Information

#### Synthesis and Structure of Pd(II) Pincer Complexes: Catalytic Application to $\beta$ -Alkylation of Secondary Alcohols Involving Sequential Dehydrogenation of Alcohols via Borrowing Hydrogen Approach

Sekar Pranesh Kavin <sup>a</sup> and Rengan Ramesh\*<sup>a</sup>

<sup>a</sup>Centre for Organometallic Chemistry, School of Chemistry, Bharathidasan University, Tiruchirappalli - 620 024, Tamilnadu, India. E-mail: [rramesh@bdu.ac.in](mailto:rramesh@bdu.ac.in); ramesh\_bdu@yahoo.com; Fax: 0091-431-2407045; Tel.: 0431- 2407053.

### Contents

|   |                                                                                                                                                                                                                                                                        |                              |
|---|------------------------------------------------------------------------------------------------------------------------------------------------------------------------------------------------------------------------------------------------------------------------|------------------------------|
| 1 | Materials, Methods and X-ray crystallographic data collection.....                                                                                                                                                                                                     | S2                           |
| 2 | Table of crystal data and refinement parameters for complex <b>3</b> .....                                                                                                                                                                                             | S3, S4                       |
| 3 | <sup>1</sup> H NMR spectra of the complexes <b>1-3</b> .....                                                                                                                                                                                                           | S5, S6                       |
| 4 | <sup>13</sup> C NMR spectra of the complexes <b>1-3</b> .....                                                                                                                                                                                                          | S7, S8                       |
| 5 | ESI-Mass spectra of complexes <b>1-3</b> .....                                                                                                                                                                                                                         | S9-S11                       |
| 6 | Characterization data for $\alpha$ -branched ketone products.....                                                                                                                                                                                                      | S12-S20                      |
| 7 | NMR spectrum of the catalytic isolated products<br>(i) Intermediate-benzaldehyde ( <b>1a'</b> ).....<br>(ii) Intermediate-acetophenone ( <b>2a'</b> ).....<br>(iii) Intermediate-chalcone ( <b>3a'</b> ).....<br>(iv) $\alpha$ -branched ketones ( <b>3a-3n</b> )..... | S21<br>S22<br>S23<br>S24-S48 |
| 8 | References .....                                                                                                                                                                                                                                                       | S49                          |

# Supporting Information

## 1. Materials and methods

Chemically pure and analar grade reagents were used for all the reactions. Commercially available  $[\text{PdCl}_2(\text{PPh}_3)_2]$ , 4-dimethylamino-2-benzaldehyde, benzhydrazide derivatives,  $\text{CDCl}_3$ ,  $\text{DMSO-d}_6$  and various alcohols was used as supplied from Sigma Aldrich. The solvents were freshly distilled before use following the standard procedures.<sup>1</sup> Melting point was recorded in the Boeties micro heating table and is uncorrected. Infrared spectra of complexes were recorded in KBr pellets with a Perkin – Elmer 597 spectrophotometer in the range of 4000-400  $\text{cm}^{-1}$ . The  $^1\text{H}$  and  $^{13}\text{C}$  NMR spectra were recorded in  $\text{CDCl}_3$  and  $\text{DMSO-d}_6$  with Bruker 400 MHz instrument using TMS as internal reference. A Micro mass thermoscientific LTQ XL mass spectrometer was utilized for electrospray ionization mass spectrometry (ESI-MS).

## 2. X-ray crystallographic data collection

Single crystals of complexes **3** were grown by slow evaporation of dichloromethane in methanol solution at room temperature. A single crystal of suitable size was covered with Paratone oil, mounted on the top of glass fiber, and transferred to a Bruker AXS Kappa APEX II single crystal X-ray diffractometer using monochromated  $\text{MoK}\alpha$  radiation ( $\lambda = 0.71073$ ). Data were collected at 293 K. The structure was solved by direct methods using SIR-97 and was refined by the full matrix least-squares method on  $F^2$  with SHELXL-97.<sup>2</sup> Non-hydrogen atoms were refined with anisotropy thermal parameters. All hydrogen atoms were geometrically fixed and collected to refine using a riding model. Frame integration and data reduction were performed using the Bruker SAINT Plus (Version 7.06a) software. The multiscan absorption corrections were applied to the data using SADABS software.<sup>3</sup>

## Supporting Information

Table S1. Crystal data and structure refinement for complex 3.

|                                                      |                                                                   |
|------------------------------------------------------|-------------------------------------------------------------------|
| <b>CCDC</b>                                          | 2191316                                                           |
| <b>Empirical formula</b>                             | C <sub>37</sub> H <sub>36</sub> N <sub>3</sub> O <sub>3</sub> PPd |
| <b>Formula weight</b>                                | 708.06                                                            |
| <b>Temperature/K</b>                                 | 298(2)                                                            |
| <b>Crystal system</b>                                | orthorhombic                                                      |
| <b>Space group</b>                                   | <i>F d d 2</i>                                                    |
| <b>a/Å, b/Å, c/Å</b>                                 | 23.9295(12), 52.455(3), 10.7669(6)                                |
| <b>α/°, β/°, γ/°</b>                                 | 90, 90, 90                                                        |
| <b>Volume/Å<sup>3</sup></b>                          | 13514.8(12)                                                       |
| <b>Z</b>                                             | 16                                                                |
| <b>ρ<sub>calc</sub> g/cm<sup>3</sup></b>             | 1.392                                                             |
| <b>m/mm<sup>-1</sup></b>                             | 0.636                                                             |
| <b>F(000)</b>                                        | 5824                                                              |
| <b>Crystal size/mm</b>                               | 0.150 x 0.220 x 0.270                                             |
| <b>Theta range for data collection</b>               | 2.11 to 30.09°                                                    |
| <b>Index ranges</b>                                  | -33<=h<=32, -73<=k<=72, -15<=l<=14                                |
| <b>Reflections collected</b>                         | 74297                                                             |
| <b>Independent reflections</b>                       | 9273 [R(int) = 0.0641]                                            |
| <b>Data/restraints/parameters</b>                    | 9273 / 1 / 409                                                    |
| <b>Goodness-of-fit on F<sup>2</sup></b>              | 0.923                                                             |
| <b>Final R indexes [I&gt;2σ (I)]</b>                 | R1 = 0.0340, wR2 = 0.1034                                         |
| <b>Final R indexes [all data]</b>                    | R1 = 0.0541, wR2 = 0.1267                                         |
| <b>Largest diff. peak and hole / eÅ<sup>-3</sup></b> | 0.459 and -0.682                                                  |

## Supporting Information

**Table S2. Selected bond lengths (Å) and bond angles (°) for complexes 3.**

| <b>Complex 3</b>       |            |
|------------------------|------------|
| <b>Pd(1)- N(1)</b>     | 1.974(4)   |
| <b>Pd(1)-O(1)</b>      | 1.989(3)   |
| <b>Pd(1)-O(2)</b>      | 1.969(3)   |
| <b>Pd(1)-P(1)</b>      | 2.2827(12) |
| <b>N(1)-Pd(1)-O(1)</b> | 80.29(16)  |
| <b>O(2)-Pd(1)-N(1)</b> | 94.56(16)  |
| <b>O(2)-Pd(1)-O(1)</b> | 174.8(2)   |
| <b>O(2)-Pd(1)-P(1)</b> | 90.30(15)  |
| <b>N(1)-Pd(1)-P(1)</b> | 172.76(11) |
| <b>O(1) Pd(1) P(1)</b> | 94.82(13)  |

# Supporting Information

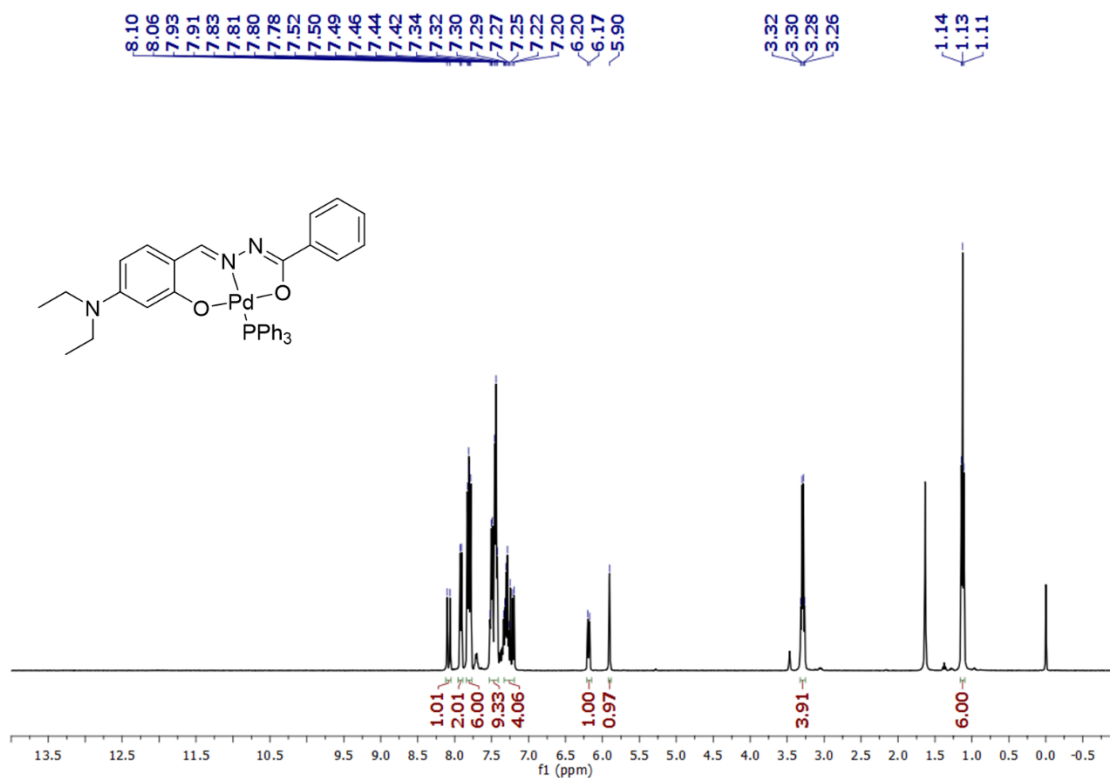

**Figure S1.**  $^1\text{H}$  NMR spectrum of complex **1** in  $\text{CDCl}_3$  (400 MHz, 293 K).

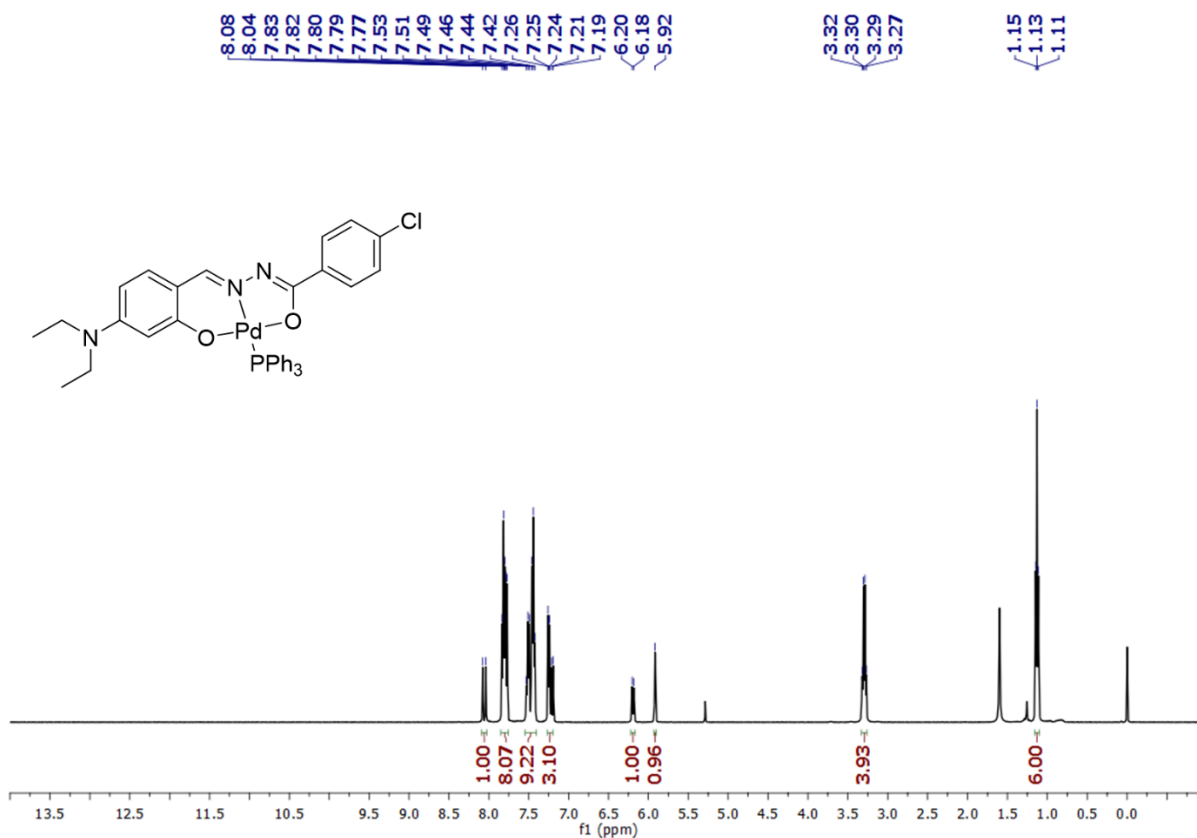

**Figure S2.**  $^1\text{H}$  NMR spectrum of complex **2** in  $\text{CDCl}_3$  (400 MHz, 293 K).

# Supporting Information

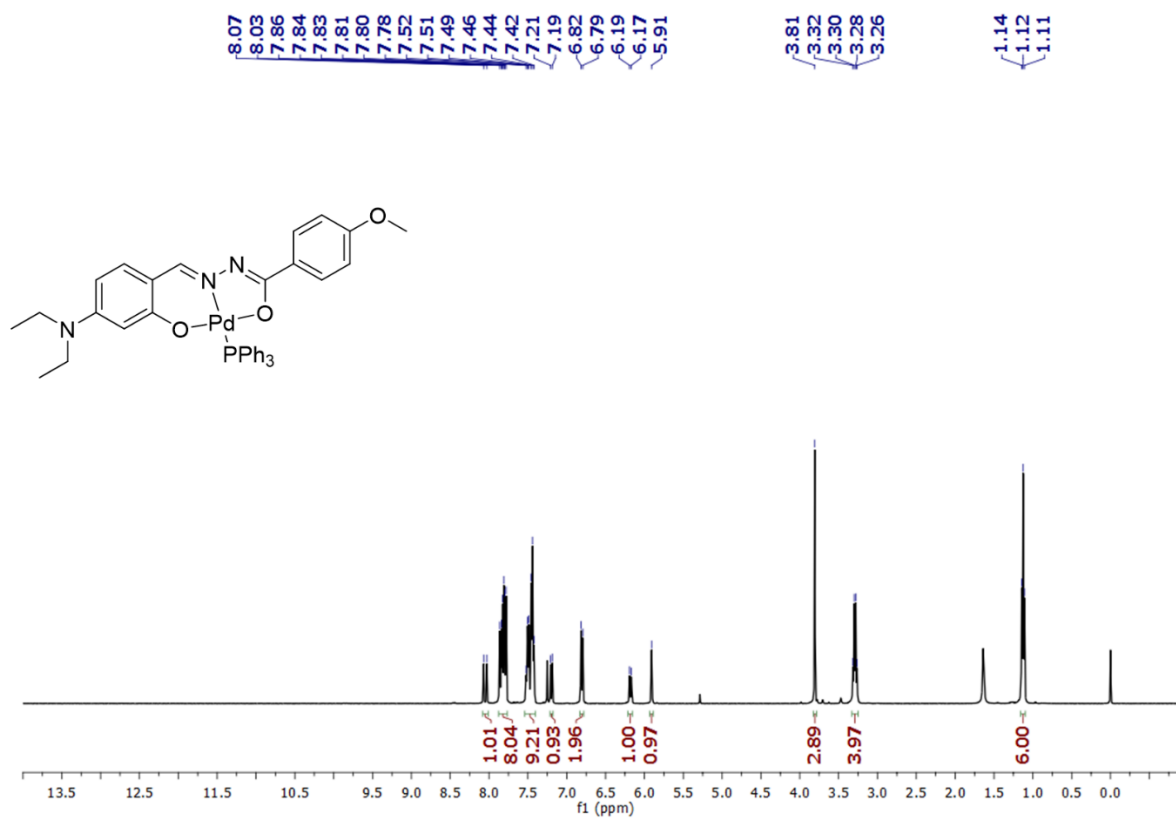

**Figure S3.** <sup>1</sup>H NMR spectrum of complex 3 in CDCl<sub>3</sub> (400 MHz, 293 K).

# Supporting Information

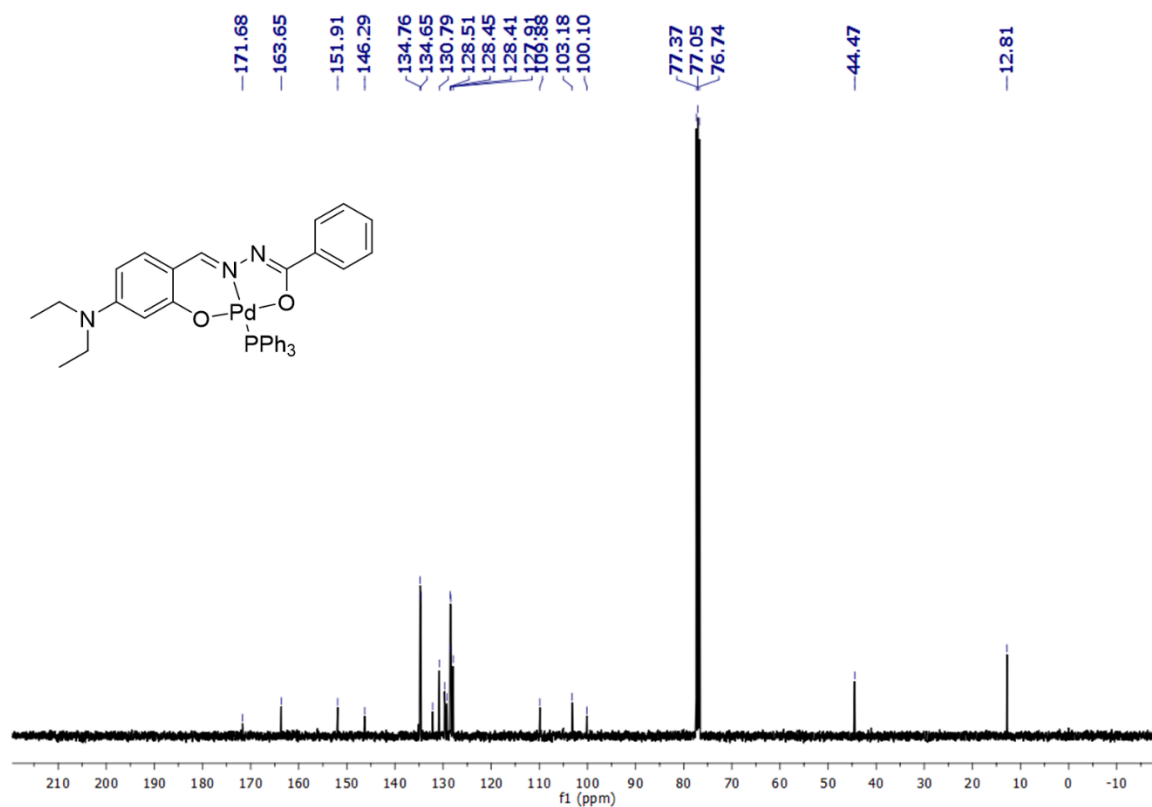

**Figure S4.**  $^{13}\text{C}$  NMR spectrum of complex 1 in  $\text{CDCl}_3$  (100 MHz, 293 K).

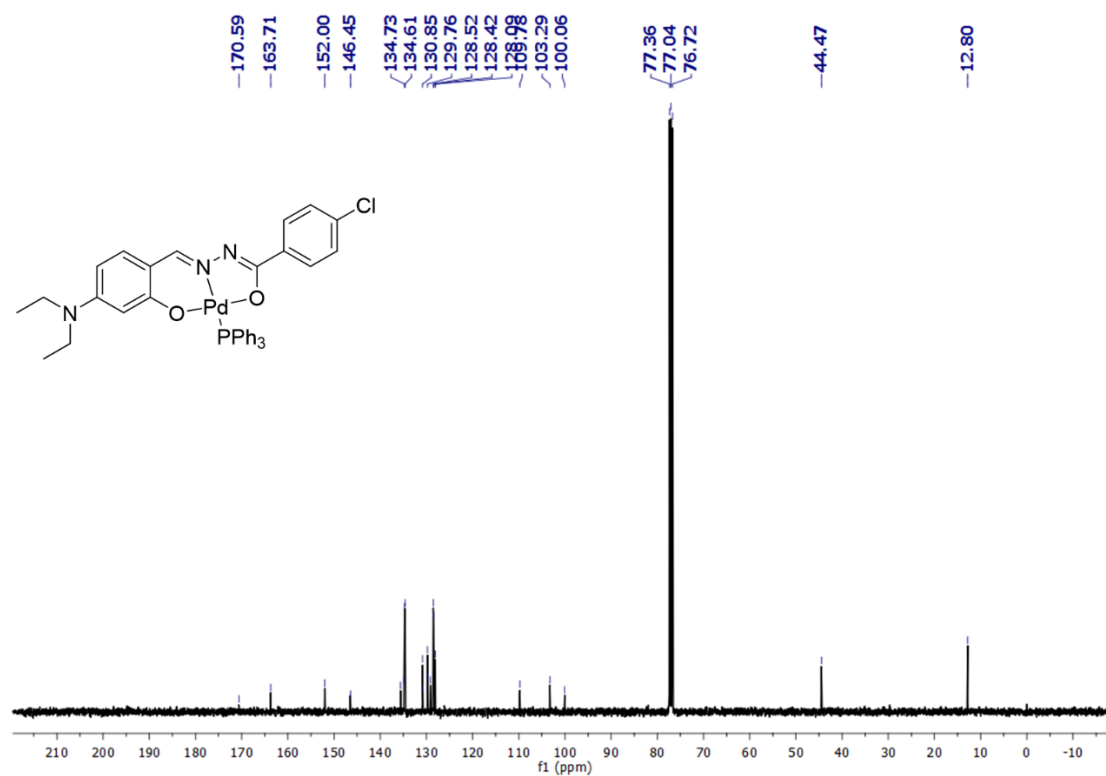

**Figure S5.**  $^{13}\text{C}$  NMR spectrum of complex 2 in  $\text{CDCl}_3$  (100 MHz, 293 K).

# Supporting Information

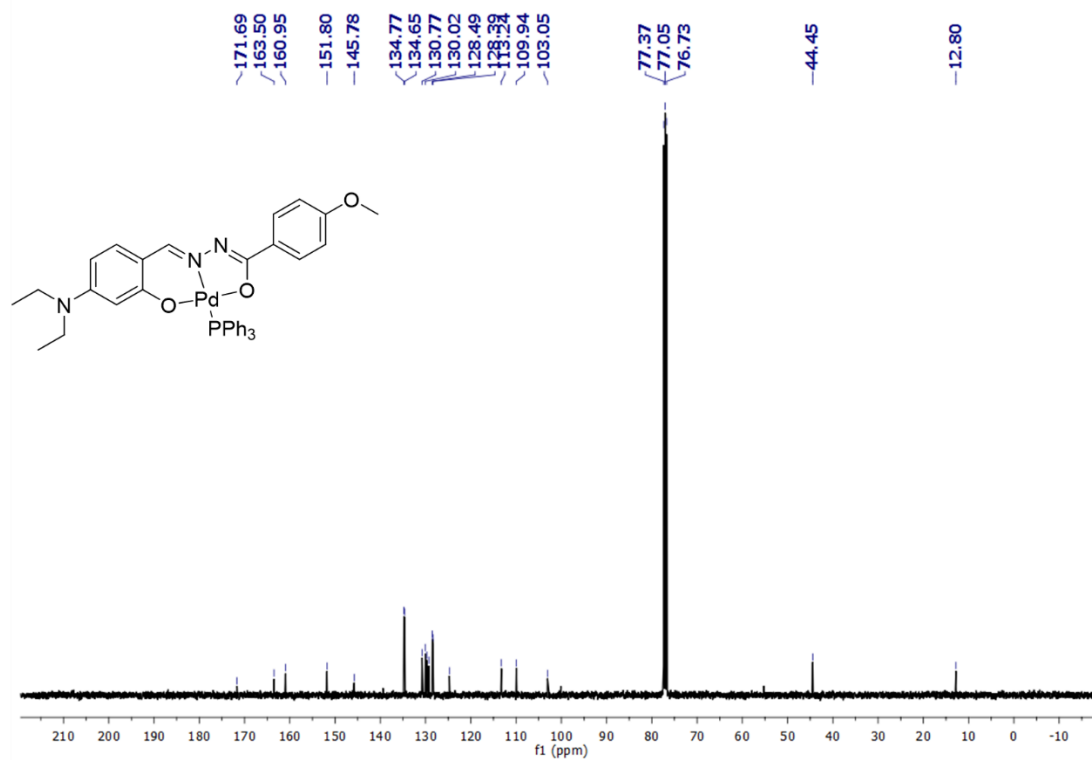

**Figure S6.**  $^{13}\text{C}$  NMR spectrum of complex **3** in  $\text{CDCl}_3$  (100 MHz, 293 K).



## Supporting Information

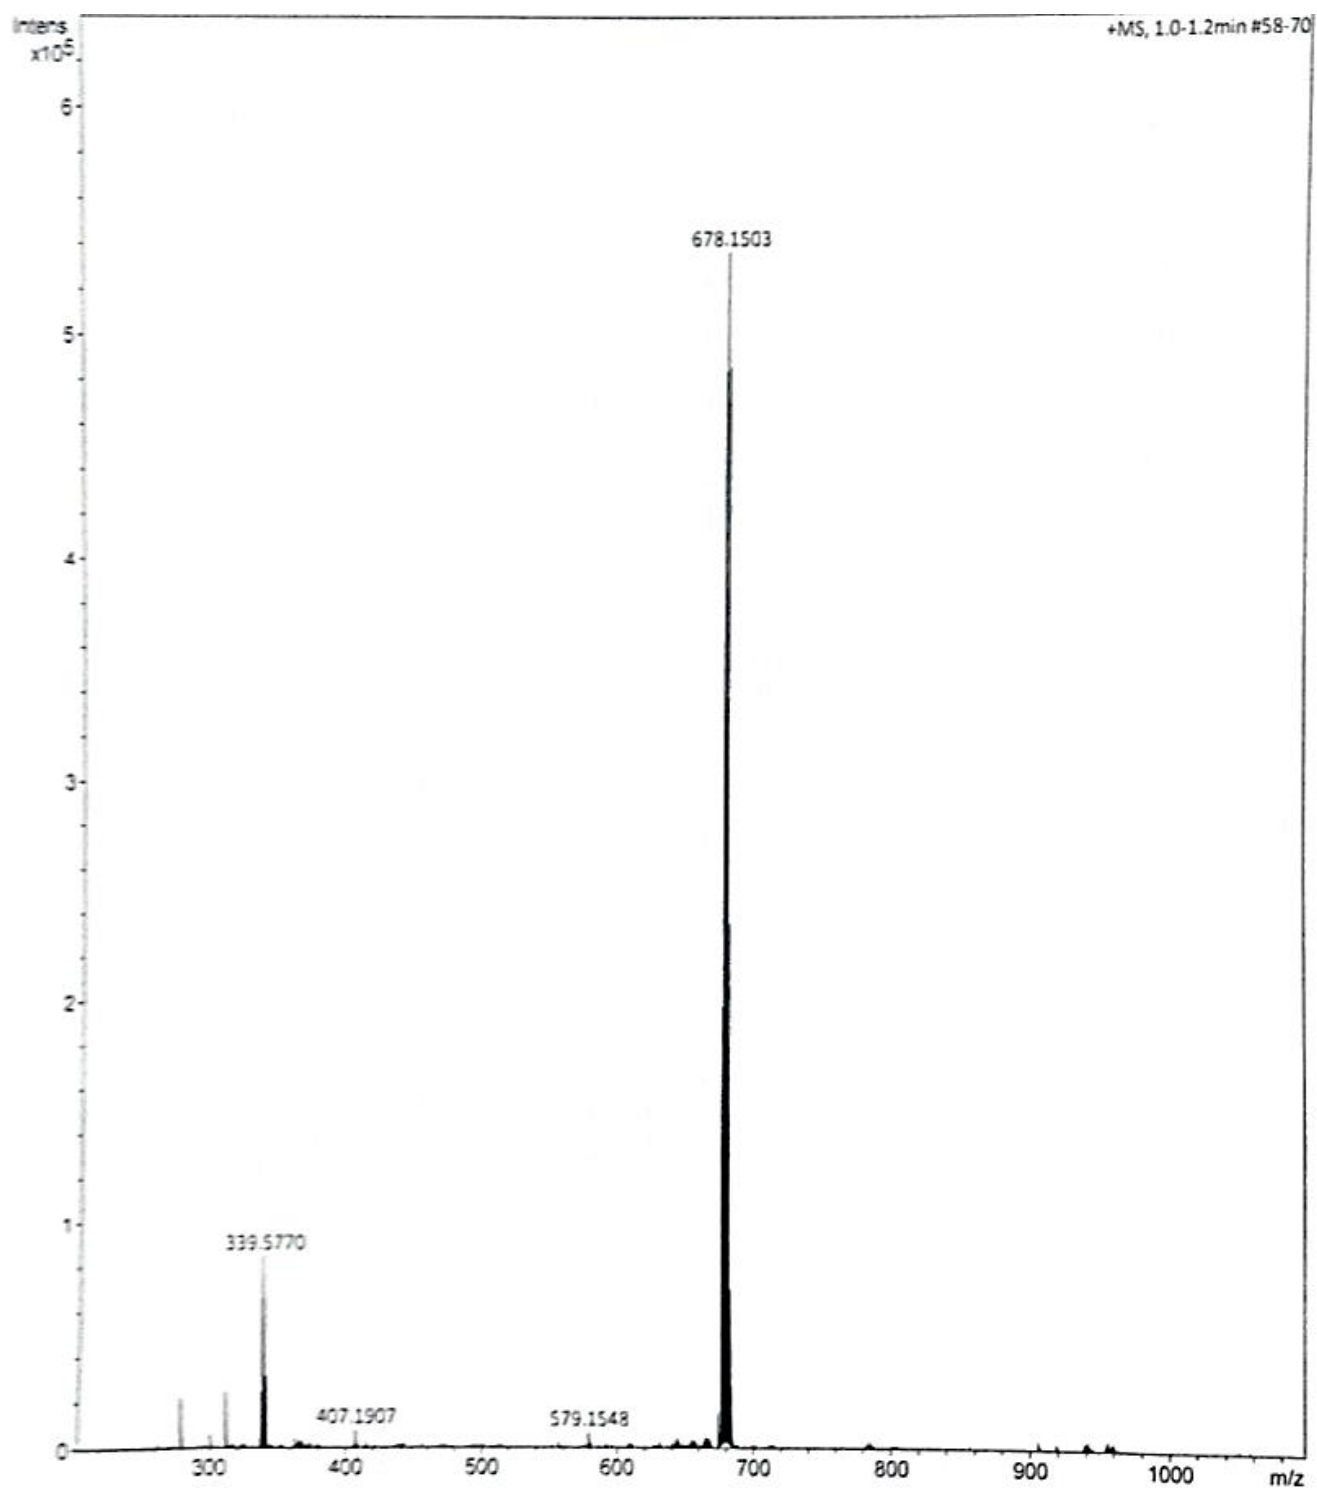

**Figure S7** MS spectrum of complex 1

## Supporting Information

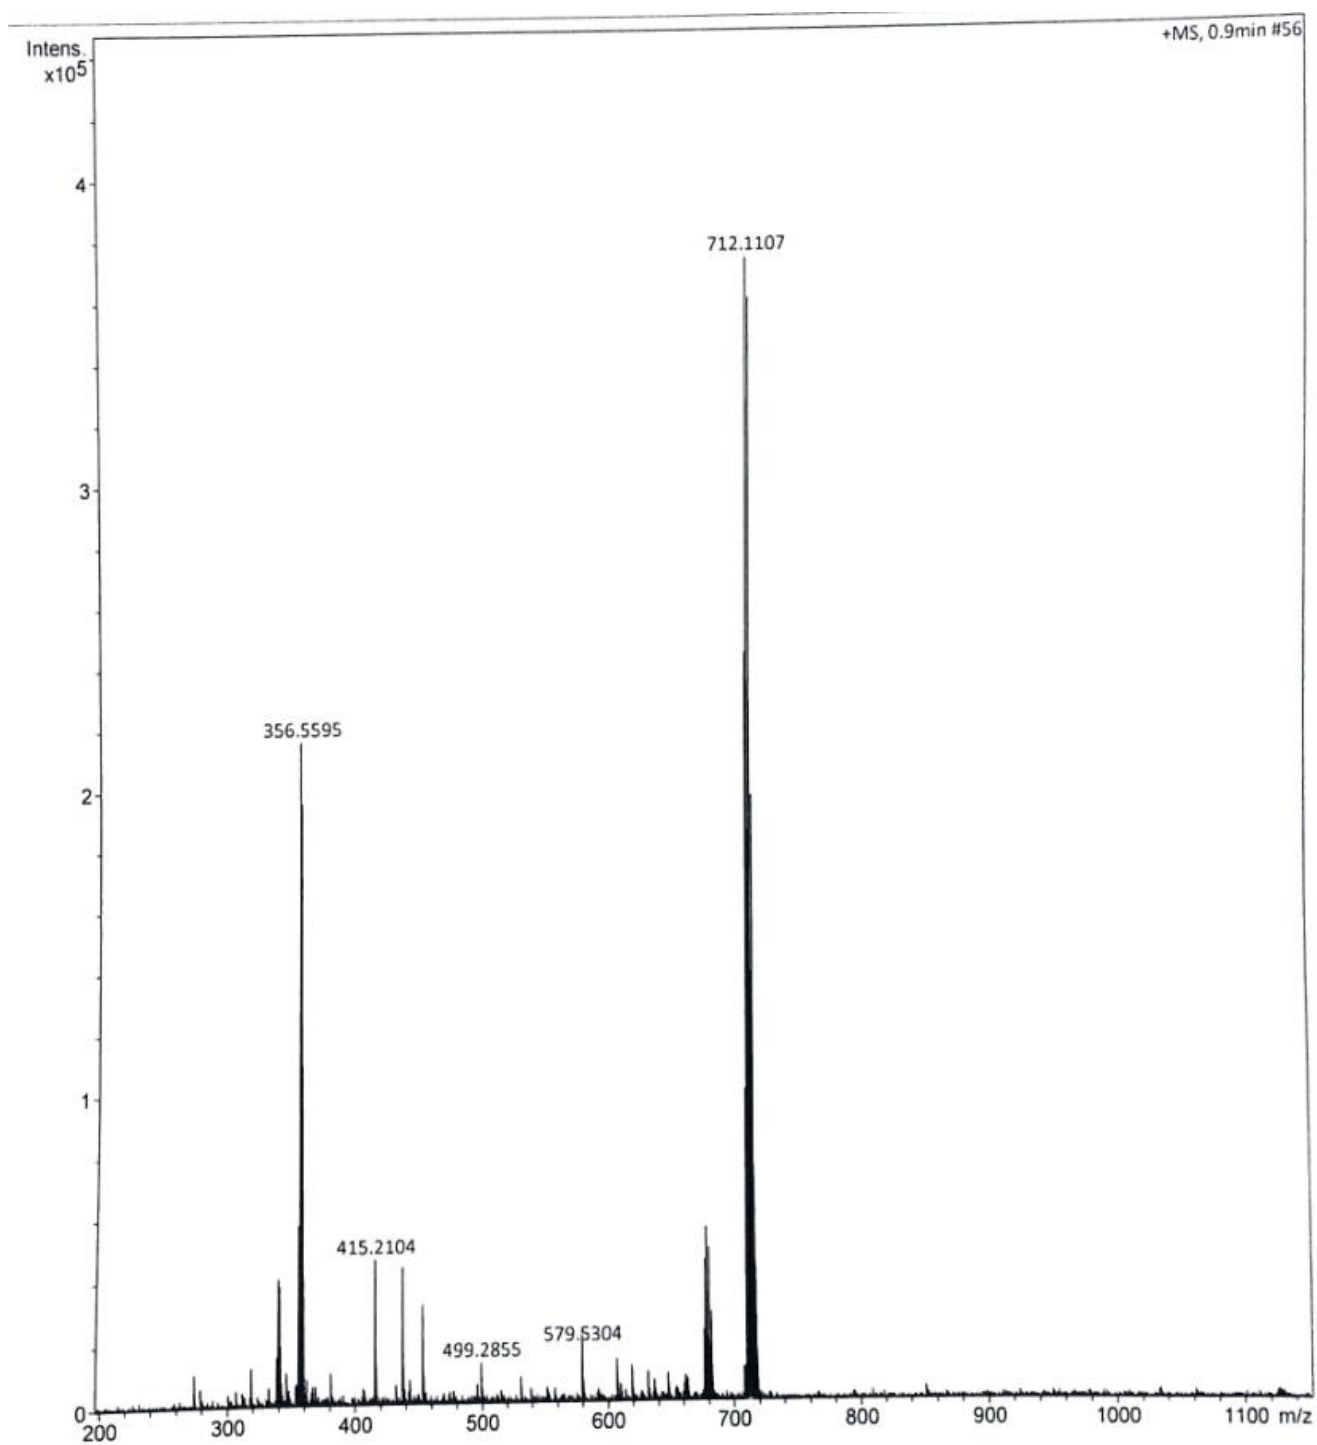

**Figure S8** MS spectrum of complex 2

## Supporting Information

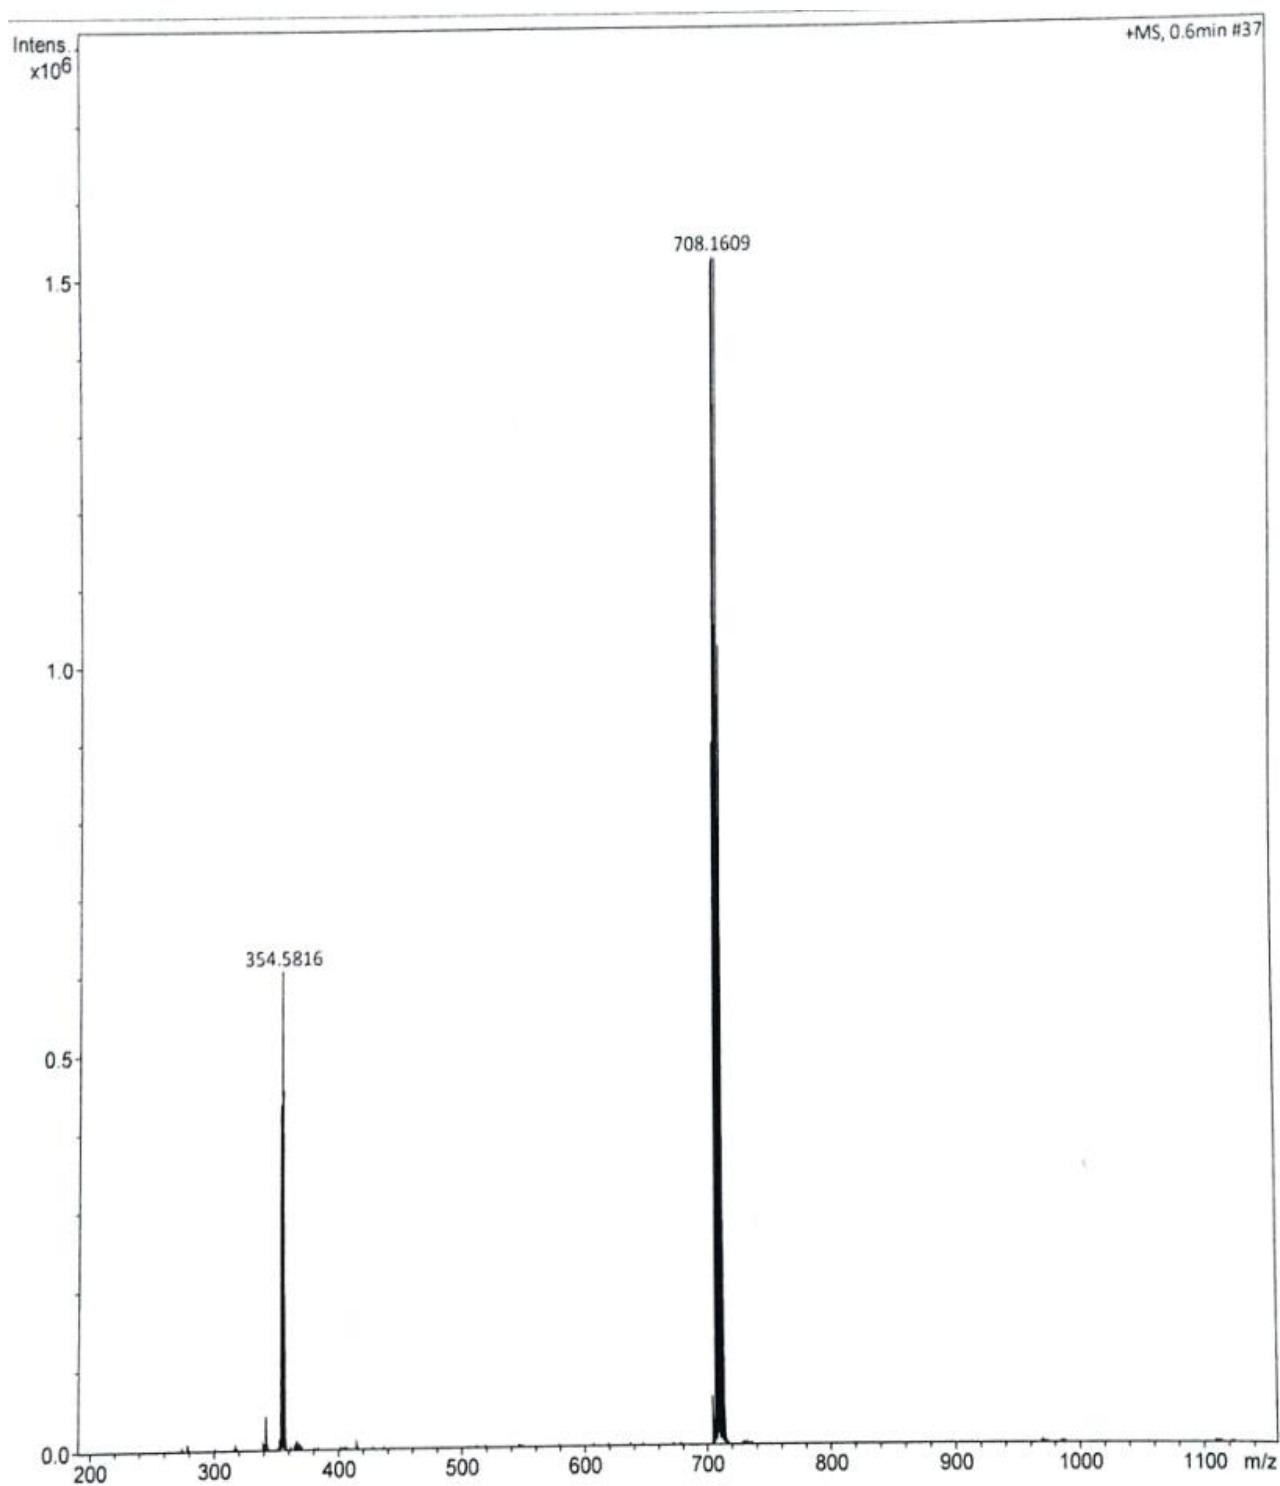

**Figure S9** MS spectrum of complex **3**

## Supporting Information

### Characterization data for $\alpha$ -branched ketone products

1,3-diphenylpropan-1-one (**3a**).<sup>4</sup>

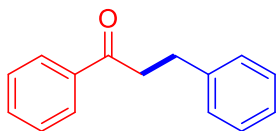

White solid (88%, 185 mg). <sup>1</sup>H NMR (400 MHz, CDCl<sub>3</sub>)  $\delta$  7.84 (d, J = 8 Hz, 2H), 7.43 (t, J = 8 Hz, 1H), 7.33 (t, J = 8 Hz, 2H), 7.21 – 7.09 (m, 5H), 3.18 (t, J = 8 Hz, 2H), 2.96 (t, J = 8 Hz, 2H). <sup>13</sup>C NMR (100 MHz, CDCl<sub>3</sub>)  $\delta$  199.27, 141.37, 136.91, 133.15, 128.68, 128.61, 128.52, 128.12, 126.22, 40.51, 30.19.

3-phenyl-1-(p-tolyl)propan-1-one (**3b**).<sup>4</sup>

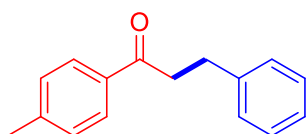

White solid (91%, 204 mg). <sup>1</sup>H NMR (400 MHz, CDCl<sub>3</sub>)  $\delta$  7.71 (d, J = 8 Hz, 2H), 7.15 – 7.07 (m, 7H), 3.10 (t, J = 8 Hz, 2H), 2.91 (t, J = 8 Hz, 2H), 2.23 (s, 3H). <sup>13</sup>C NMR (100 MHz, CDCl<sub>3</sub>)  $\delta$  197.69, 142.68, 140.31, 133.29, 128.18, 127.41, 127.34, 127.29, 127.07, 125.00, 39.19, 29.09, 20.52.

1-(4-chlorophenyl)-3-phenylpropan-1-one (**3c**).<sup>4</sup>

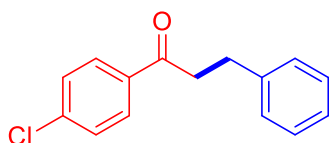

White solid (84%, 206 mg). <sup>1</sup>H NMR (400 MHz, CDCl<sub>3</sub>)  $\delta$  7.73 (d, J = 8 Hz, 1H), 7.25 (d, J = 8 Hz, 2H), 7.16 – 7.10 (m, 6H), 3.11 (t, J = 8 Hz, 2H), 2.94 (t, J = 8 Hz, 2H). <sup>13</sup>C NMR (100 MHz, CDCl<sub>3</sub>)  $\delta$  197.98, 141.16, 139.52, 135.22, 129.55, 128.98, 128.52, 128.12, 126.31, 40.47, 30.10.

## Supporting Information

1-phenyl-3-(p-tolyl)propan-1-one (**3d**).<sup>4</sup>

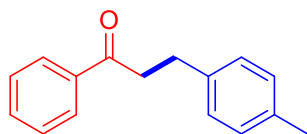

White solid (90%, 202 mg). <sup>1</sup>H NMR (400 MHz, CDCl<sub>3</sub>) δ 7.86 (d, J = 8 Hz, 2H), 7.45 (t, J = 8 Hz, 1H), 7.35 (t, J = 8 Hz, 2H), 7.05 – 7.01 (m, 4H), 6.93 (s, 1H), 3.19 (t, J = 8 Hz, 2H), 2.94 (t, J = 8 Hz, 2H), 2.23 (s, 3H). <sup>13</sup>C NMR (100 MHz, CDCl<sub>3</sub>) δ 199.41, 138.24, 136.92, 135.67, 133.09, 129.27, 129.11, 128.95, 128.65, 128.36, 128.10, 40.66, 29.76, 21.07.

1,3-di-p-tolylpropan-1-one (**3e**).<sup>5</sup>

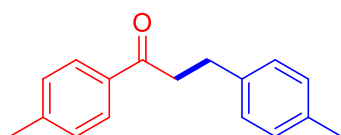

White solid (92%, 220 mg). <sup>1</sup>H NMR (400 MHz, CDCl<sub>3</sub>) δ 7.85 (d, J = 8 Hz, 2H), 7.23 (d, J = 8 Hz, 2H), 7.15-7.09 (m, 4H), 3.24 (t, J = 8 Hz, 2H), 3.01 (t, J = 8 Hz, 2H), 2.39 (s, 3H), 2.31 (s, 3H). <sup>13</sup>C NMR (100 MHz, CDCl<sub>3</sub>) δ 199.02, 143.81, 138.35, 135.60, 134.47, 129.37, 129.23, 128.34, 128.21, 40.54, 29.84, 21.66, 21.05.

1-(4-chlorophenyl)-3-(p-tolyl)propan-1-one (**3f**).<sup>5</sup>

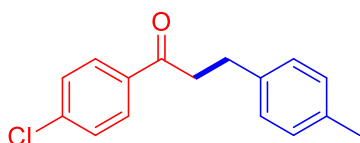

White solid (85%, 220 mg). <sup>1</sup>H NMR (400 MHz, CDCl<sub>3</sub>) δ 7.80 (d, J = 8 Hz, 2H), 7.33 (d, J = 8 Hz, 2H), 7.06-7.01 (m, 4H), 3.16 (t, J = 8 Hz, 2H), 2.94 (t, J = 8 Hz, 2H), 2.24 (s, 3H). <sup>13</sup>C NMR (100 MHz, CDCl<sub>3</sub>) δ 198.15, 139.50, 137.98, 135.76, 135.21, 129.49, 129.27, 128.94, 128.31, 40.61, 29.66, 21.04.

## Supporting Information

1-phenyl-3-(m-tolyl)propan-1-one (**3g**).<sup>6</sup>

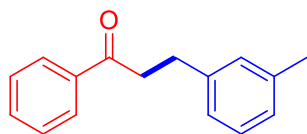

White solid (87%, 195 mg). <sup>1</sup>H NMR (400 MHz, CDCl<sub>3</sub>) δ 7.86 (d, J = 8 Hz, 2H), 7.44 (t, J = 8 Hz, 1H), 7.34 (t, J = 8 Hz, 2H), 7.09 (t, J = 8 Hz, 1H), 6.97-6.92 (m, 3H), 3.19 (t, J = 8 Hz, 2H), 2.93 (t, J = 8 Hz, 2H), 2.24 (s, 3H). <sup>13</sup>C NMR (100 MHz, CDCl<sub>3</sub>) δ 198.24, 140.18, 137.04, 135.80, 131.99, 128.19, 127.54, 127.39, 126.99, 125.83, 124.35, 39.47, 29.00, 20.35.

3-(m-tolyl)-1-(p-tolyl)propan-1-one (**3h**).

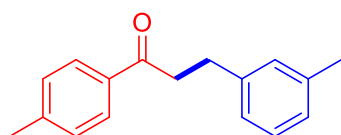

White solid (89%, 212 mg). <sup>1</sup>H NMR (400 MHz, CDCl<sub>3</sub>) δ 7.76 (d, J = 8 Hz, 2H), 7.14 (d, J = 8 Hz, 2H), 7.09 (t, J = 8 Hz, 1H), 6.97-6.91 (m, 3H), 3.16 (t, J = 8 Hz, 2H), 2.92 (t, J = 8 Hz, 2H), 2.30 (s, 3H), 2.23 (s, 3H). <sup>13</sup>C NMR (100 MHz, CDCl<sub>3</sub>) δ 198.98, 143.83, 141.39, 138.11, 134.46, 129.31, 129.28, 128.47, 128.22, 126.89, 125.44, 40.46, 30.20, 21.66, 21.45.

1-(4-chlorophenyl)-3-(m-tolyl)propan-1-one (**3i**).

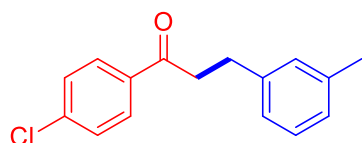

White solid (80%, 207 mg). <sup>1</sup>H NMR (400 MHz, CDCl<sub>3</sub>) δ 7.89 (d, J = 8 Hz, 2H), 7.42 (d, J = 8 Hz, 2H), 7.19 (t, J = 8 Hz, 1H), 7.04 (t, J = 8 Hz, 3H), 3.26 (t, J = 8 Hz, 2H), 3.02 (t, J = 8 Hz, 2H), 2.33 (s, 3H). <sup>13</sup>C NMR (100 MHz, CDCl<sub>3</sub>) δ 198.12, 141.01, 139.52, 138.02, 135.19, 129.49, 129.24, 128.94, 128.50, 126.99, 125.39, 40.54, 30.00, 21.42.

## Supporting Information

3-(4-methoxyphenyl)-1-phenylpropan-1-one (**3j**).<sup>4</sup>

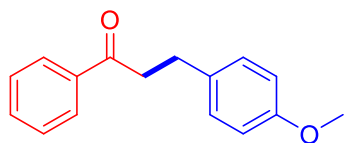

White solid (86%, 207 mg). <sup>1</sup>H NMR (400 MHz, CDCl<sub>3</sub>) δ 7.87 (d, J = 8 Hz, 2H), 7.47 (t, J = 8 Hz, 1H), 7.36 (t, J = 8 Hz, 2H), 7.09 (d, J = 8 Hz, 2H), 6.76 (d, J = 8 Hz, 2H), 3.70 (s, 3H), 3.18 (t, J = 8 Hz, 2H), 2.93 (t, J = 8 Hz, 2H). <sup>13</sup>C NMR (100 MHz, CDCl<sub>3</sub>) δ 199.45, 158.02, 136.93, 133.35, 133.07, 129.39, 128.63, 128.08, 113.97, 55.30, 40.74, 29.31.

3-(4-methoxyphenyl)-1-(p-tolyl)propan-1-one (**3k**).<sup>5</sup>

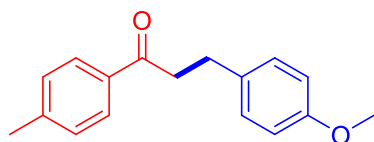

White solid (95%, 242 mg). <sup>1</sup>H NMR (400 MHz, CDCl<sub>3</sub>) δ 7.85 (d, J = 8 Hz, 2H), 7.24 (d, J = 8 Hz, 2H), 7.17 (d, J = 8 Hz, 2H), 6.84 (d, J = 8 Hz, 2H), 3.78 (s, 3H), 3.24 (t, J = 8 Hz, 2H), 3.00 (t, J = 8 Hz, 2H), 2.40 (s, 3H). <sup>13</sup>C NMR (100 MHz, CDCl<sub>3</sub>) δ 199.09, 157.98, 143.80, 134.45, 133.44, 129.35, 128.18, 113.93, 55.29, 40.62, 29.38, 21.63.

1-(4-chlorophenyl)-3-(4-methoxyphenyl)propan-1-one (**3l**).<sup>5</sup>

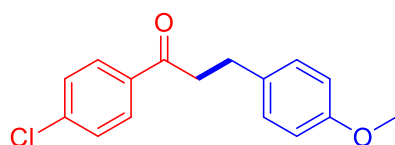

White solid (83%, 228 mg). <sup>1</sup>H NMR (400 MHz, CDCl<sub>3</sub>) δ 7.88 (d, J = 8 Hz, 2H), 7.42 (d, J = 8 Hz, 2H), 7.16 (d, J = 8 Hz, 2H), 6.84 (d, J = 8 Hz, 2H), 3.79 (s, 3H), 3.21 (t, J = 8 Hz, 2H), 3.00 (t, J = 8 Hz, 2H). <sup>13</sup>C NMR (100 MHz, CDCl<sub>3</sub>) δ 198.22, 158.07, 139.50, 135.22, 133.09, 129.49, 129.37, 128.94, 113.91, 55.30, 40.71, 29.22.

## Supporting Information

1-phenyl-3-(3,4,5-trimethoxyphenyl)propan-1-one (**3m**).<sup>7</sup>

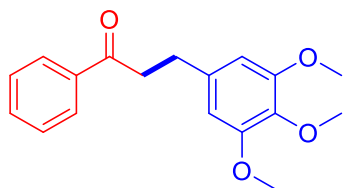

White solid (76%, 228 mg). <sup>1</sup>H NMR (400 MHz, CDCl<sub>3</sub>) δ 7.87 (d, J = 8 Hz, 2H), 7.46 (d, J = 8 Hz, 2H), 7.37 (t, J = 8 Hz, 2H), 7.24 – 7.15 (m, 2H), 6.99 (t, J = 8 Hz, 1H), 3.23 (t, J = 8 Hz, 2H), 3.10 (t, J = 8 Hz, 2H). <sup>13</sup>C NMR (100 MHz, CDCl<sub>3</sub>) δ 197.91, 139.52, 135.70, 132.09, 131.85, 129.77, 127.57, 127.04, 126.95, 126.60, 123.32, 37.56, 29.75.

1-(p-tolyl)-3-(3,4,5-trimethoxyphenyl)propan-1-one (**3n**).

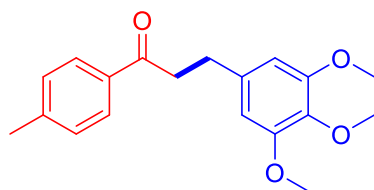

White solid (81%, 255 mg). <sup>1</sup>H NMR (400 MHz, CDCl<sub>3</sub>) δ 7.86 (d, J = 8 Hz, 2H), 7.25 (d, J = 8 Hz, 2H), 6.46 (s, 2H), 3.83 (d, J = 8 Hz, 9H), 3.27 (t, J = 8 Hz, 2H), 3.00 (t, J = 8 Hz, 2H), 2.41 (s, 3H). <sup>13</sup>C NMR (100 MHz, CDCl<sub>3</sub>) δ 198.93, 153.22, 143.92, 137.23, 136.33, 134.43, 129.31, 128.17, 105.40, 60.85, 56.10, 40.48, 30.71, 21.64.

1-(4-chlorophenyl)-3-(3,4,5-trimethoxyphenyl)propan-1-one (**3o**).

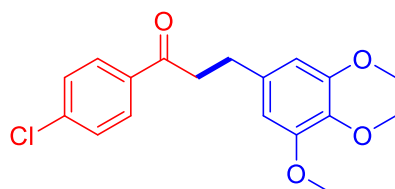

White solid (65%, 218 mg). <sup>1</sup>H NMR (400 MHz, CDCl<sub>3</sub>) δ 7.96 (d, J = 8 Hz, 1H), 7.56 (d, J = 8 Hz, 1H), 7.46 (t, J = 8 Hz, 2H), 6.47 (s, 2H), 3.83 (d, J = 8 Hz, 9H), 3.30 (t, J = 8 Hz, 2H), 3.02 (t, J = 8 Hz, 2H). <sup>13</sup>C NMR (100 MHz, CDCl<sub>3</sub>) δ 199.32, 153.24, 137.14, 136.33, 133.16, 128.65, 128.06, 105.39, 60.88, 56.11, 40.61, 30.63.



## Supporting Information

3-(4-chlorophenyl)-1-phenylpropan-1-one (**3p**).

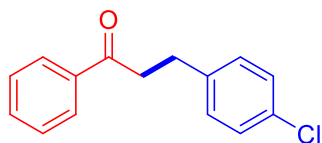

White solid (79%, 193 mg).  $^1\text{H}$  NMR (400 MHz,  $\text{CDCl}_3$ )  $\delta$  7.87 (d,  $J = 8$  Hz, 2H), 7.47 (t,  $J = 8$  Hz, 1H), 7.36 (t,  $J = 8$  Hz, 2H), 7.09 (d,  $J = 8$  Hz, 2H), 6.76 (d,  $J = 8$  Hz, 2H), 3.70 (s, 3H), 3.18 (t,  $J = 8$  Hz, 2H), 2.93 (t,  $J = 8$  Hz, 2H).  $^{13}\text{C}$  NMR (100 MHz,  $\text{CDCl}_3$ )  $\delta$  199.45, 158.02, 136.93, 133.35, 133.07, 129.39, 128.63, 128.08, 113.97, 55.30, 40.74, 29.31.

3-(4-chlorophenyl)-1-(p-tolyl)propan-1-one (**3q**).<sup>5</sup>

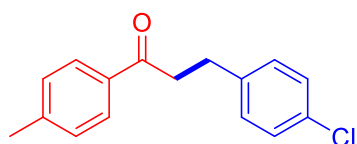

White solid (78%, 202 mg).  $^1\text{H}$  NMR (400 MHz,  $\text{CDCl}_3$ )  $\delta$  7.79-7.75 (m, 2H), 7.22-7.08 (m, 6H), 3.17 (t,  $J = 8$  Hz, 2H), 2.96 (t,  $J = 8$  Hz, 2H), 2.32 (s, 3H).  $^{13}\text{C}$  NMR (100 MHz,  $\text{CDCl}_3$ )  $\delta$  197.87, 142.80, 140.36, 138.80, 133.34, 128.79, 128.24, 127.47, 127.39, 127.13, 125.06, 39.30, 29.17, 20.59.

1,3-bis(4-chlorophenyl)propan-1-one (**3r**).<sup>5</sup>

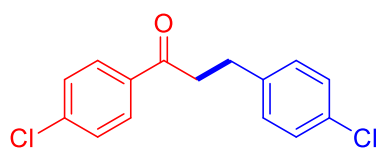

White solid (63%, 176 mg).  $^1\text{H}$  NMR (400 MHz,  $\text{CDCl}_3$ )  $\delta$  7.81 (d,  $J = 8$  Hz, 2H), 7.35 (d,  $J = 8$  Hz, 2H), 7.18 (d,  $J = 8$  Hz, 2H), 7.10 (d,  $J = 8$  Hz, 2H), 3.17 (t,  $J = 8$  Hz, 2H), 2.96 (t,  $J = 8$  Hz, 2H).  $^{13}\text{C}$  NMR (100 MHz,  $\text{CDCl}_3$ )  $\delta$  197.64, 139.67, 139.52, 135.06, 131.99, 129.83, 129.45, 128.99, 128.66, 40.14, 29.30.

## Supporting Information

3-(4-bromophenyl)-1-phenylpropan-1-one (**3s**).<sup>8</sup>

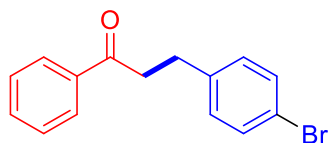

White solid (77%, 223 mg). <sup>1</sup>H NMR (400 MHz, CDCl<sub>3</sub>) δ 7.94 (d, J = 8 Hz, 2H), 7.56 (t, J = 8 Hz, 1H), 7.47 – 7.39 (m, 4H), 7.13 (d, J = 8 Hz, 2H), 3.28 (t, J = 8 Hz, 2H), 3.02 (t, J = 8 Hz, 2H). <sup>13</sup>C NMR (100 MHz, CDCl<sub>3</sub>) δ 198.87, 140.29, 136.75, 133.22, 131.58, 130.27, 128.68, 128.04, 119.92, 40.09, 29.45.

3-(4-bromophenyl)-1-(p-tolyl)propan-1-one (**3t**).

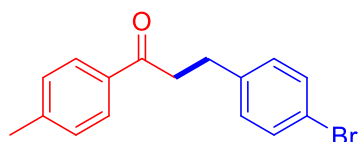

White solid (82%, 249 mg). <sup>1</sup>H NMR (400 MHz, CDCl<sub>3</sub>) δ 7.84 (d, J = 8 Hz, 2H), 7.40 (d, J = 8 Hz, 2H), 7.24 (d, J = 8 Hz, 2H), 7.12 (d, J = 8 Hz, 2H), 3.24 (t, J = 8 Hz, 3H), 3.01 (t, J = 8 Hz, 3H), 2.40 (s, 3H). <sup>13</sup>C NMR (100 MHz, CDCl<sub>3</sub>) δ 198.47, 143.99, 140.40, 134.30, 131.55, 130.26, 129.33, 129.29, 128.53, 128.44, 128.18, 128.15, 126.11, 119.86, 39.95, 29.53, 21.65.

3-(4-bromophenyl)-1-(4-chlorophenyl)propan-1-one (**3u**).

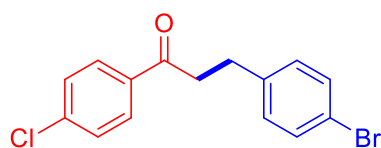

White solid (62%, 201 mg). <sup>1</sup>H NMR (400 MHz, CDCl<sub>3</sub>) δ 7.88 (d, J = 8 Hz, 2H), 7.42 (t, J = 8 Hz, 4H), 7.12 (d, J = 8 Hz, 2H), 3.25 (t, J = 8 Hz, 2H), 3.02 (t, J = 8 Hz, 2H). <sup>13</sup>C NMR (100 MHz, CDCl<sub>3</sub>) δ 197.60, 140.05, 139.68, 135.04, 131.62, 130.71, 130.24, 129.45, 129.00, 120.01, 40.08, 29.35.

## Supporting Information

3-(2-bromophenyl)-1-phenylpropan-1-one (**3v**).

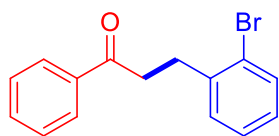

White solid (72%, 208 mg).  $^1\text{H}$  NMR (400 MHz,  $\text{CDCl}_3$ )  $\delta$  7.87 (d,  $J = 8$  Hz, 2H), 7.46 (d,  $J = 8$  Hz, 2H), 7.37 (t,  $J = 8$  Hz, 2H), 7.24 – 7.15 (m, 2H), 6.99 (t,  $J = 8$  Hz, 1H), 3.23 (t,  $J = 8$  Hz, 2H), 3.10 (t,  $J = 8$  Hz, 2H).  $^{13}\text{C}$  NMR (100 MHz,  $\text{CDCl}_3$ )  $\delta$  197.91, 139.52, 135.70, 132.09, 131.85, 129.77, 127.57, 127.04, 126.95, 126.60, 123.32, 37.56, 29.75.

3-(benzo[d][1,3]dioxol-5-yl)-1-phenylpropan-1-one (**3w**).<sup>4</sup>

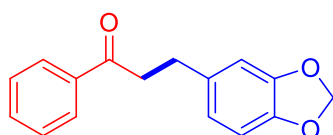

White solid (64%, 163 mg).  $^1\text{H}$  NMR (400 MHz,  $\text{CDCl}_3$ )  $\delta$  7.88 (d,  $J = 8$  Hz, 2H), 7.48 (d,  $J = 8$  Hz, 1H), 7.39 (d,  $J = 8$  Hz, 2H), 6.67 - 6.61 (m, 3H), 5.85 (s, 1H), 3.19 (t,  $J = 8$  Hz, 2H), 2.92 (t,  $J = 8$  Hz, 2H).  $^{13}\text{C}$  NMR (100 MHz,  $\text{CDCl}_3$ )  $\delta$  198.21, 157.17, 146.62, 144.81, 135.82, 134.05, 132.06, 127.59, 127.01, 120.15, 107.91, 107.26, 99.80, 39.65, 28.85.

3-(benzo[d][1,3]dioxol-5-yl)-1-(p-tolyl)propan-1-one (**3x**).

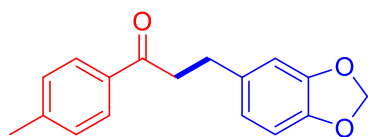

White solid (68%, 183 mg).  $^1\text{H}$  NMR (400 MHz,  $\text{CDCl}_3$ )  $\delta$  7.85 (d,  $J = 8$  Hz, 2H), 7.24 (d,  $J = 8$  Hz, 2H), 6.74-6.68 (m, 3H), 5.91 (s, 2H), 3.32 (t,  $J = 8$  Hz, 2H), 2.97 (t,  $J = 8$  Hz, 2H), 2.40 (s, 3H).  $^{13}\text{C}$  NMR (100 MHz,  $\text{CDCl}_3$ )  $\delta$  198.87, 147.65, 145.83, 143.86, 135.21, 134.41, 129.29, 128.17, 121.17, 108.94, 108.28, 100.83, 40.57, 29.98, 21.63.

## Supporting Information

3-(benzo[d][1,3]dioxol-5-yl)-1-(4-chlorophenyl)propan-1-one (**3y**).

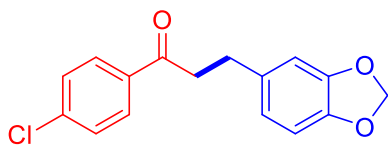

White solid (60%, 173 mg).  $^1\text{H}$  NMR (400 MHz,  $\text{CDCl}_3$ )  $\delta$  7.79 (d,  $J = 8$  Hz, 2H), 7.33 (d,  $J = 8$  Hz, 2H), 6.66 - 6.61 (m, 3H), 5.83 (s, 2H), 3.13 (t,  $J = 8$  Hz, 2H), 2.89 (t,  $J = 8$  Hz, 2H).  $^{13}\text{C}$  NMR (100 MHz,  $\text{CDCl}_3$ )  $\delta$  196.92, 146.64, 144.86, 138.47, 134.10, 133.78, 128.41, 127.88, 127.57, 126.99, 120.13, 107.86, 107.27, 99.82, 39.60, 28.74.

# Supporting Information

## NMR spectrum of the catalytic isolated products

(i) Intermediate-benzaldehyde

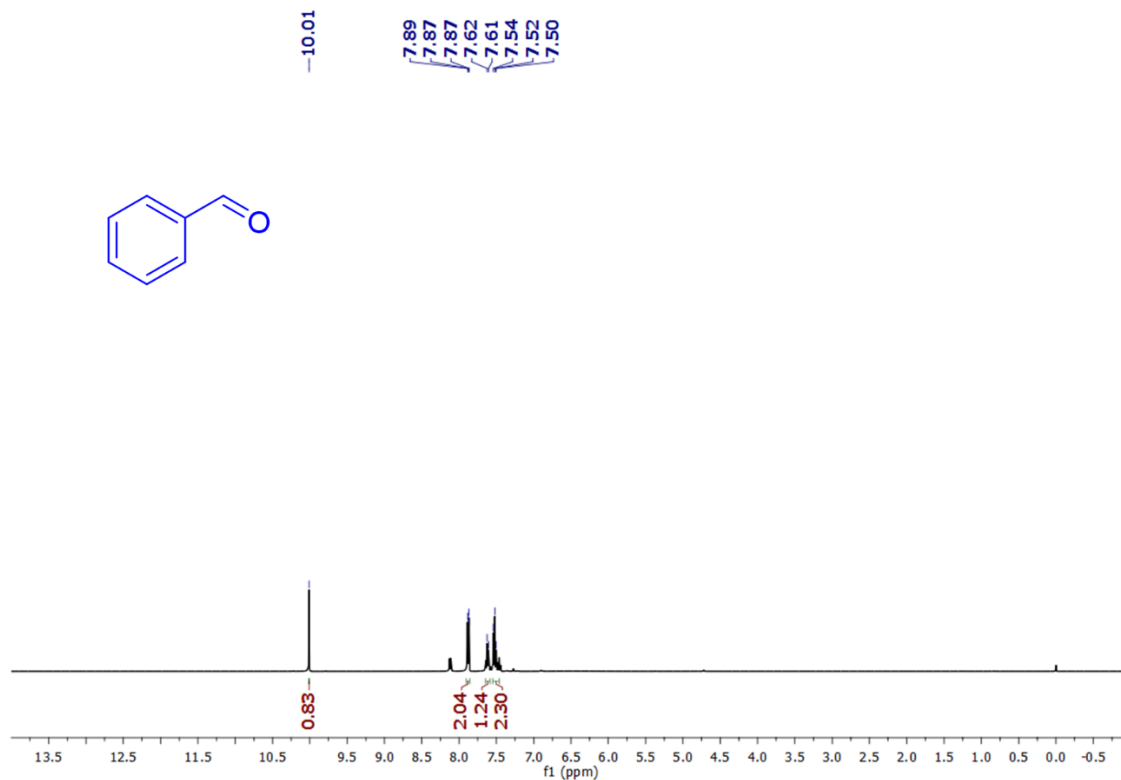

**Figure S10.** <sup>1</sup>H NMR spectrum of benzaldehyde **2a'** in CDCl<sub>3</sub> (400 MHz, 293 K).

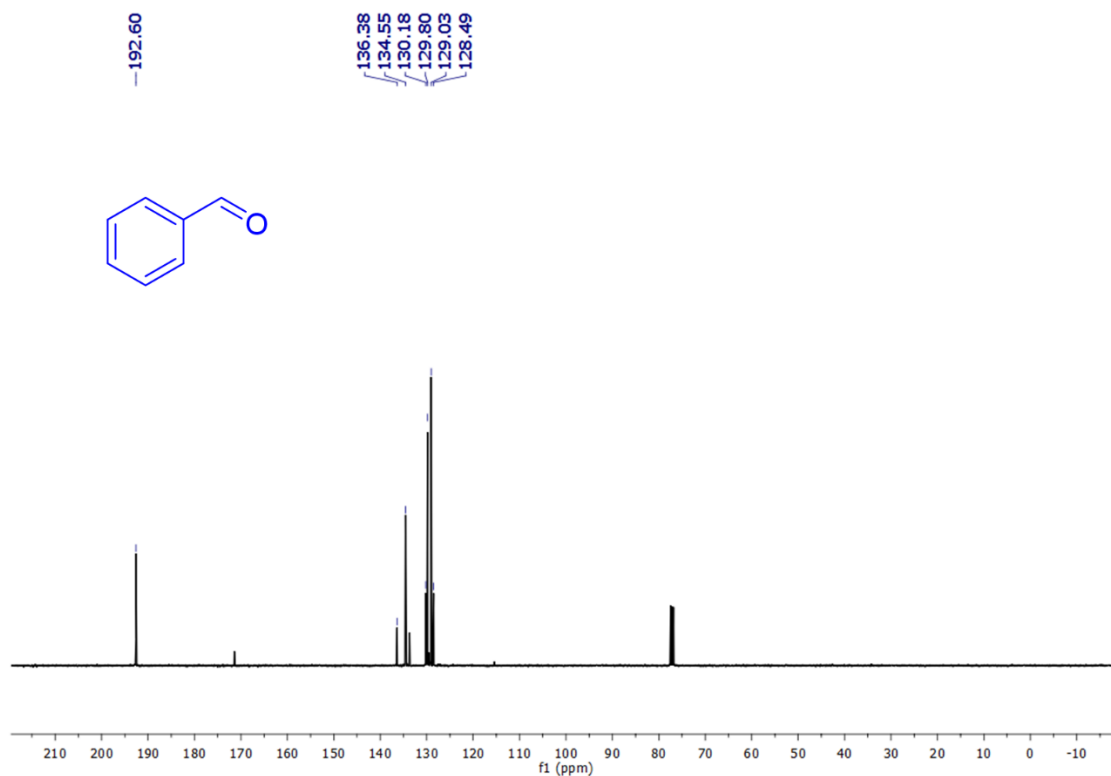

**Figure S11.** <sup>13</sup>C NMR spectrum of benzaldehyde **2a'** in CDCl<sub>3</sub> (100 MHz, 293 K).

## Supporting Information

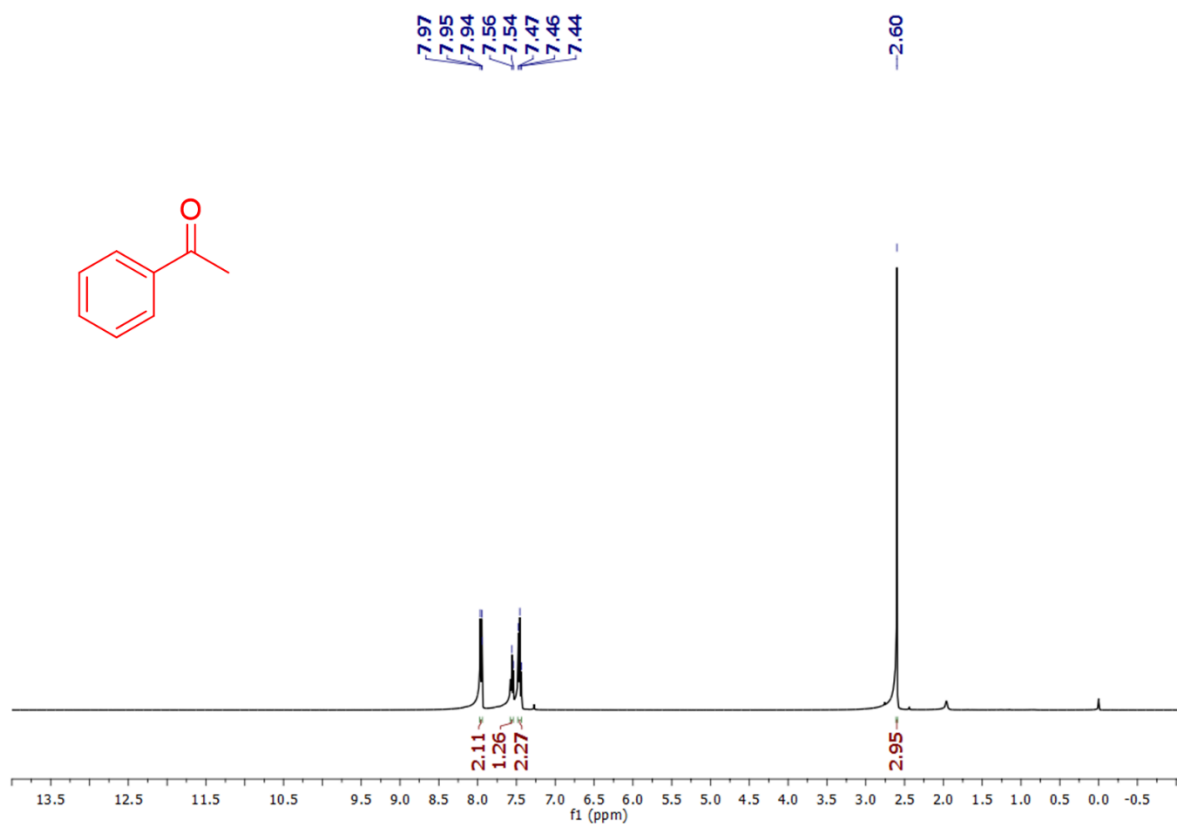

**Figure S12.**  $^1\text{H}$  NMR spectrum of acetophenone **2a'** in  $\text{CDCl}_3$  (400 MHz, 293 K).

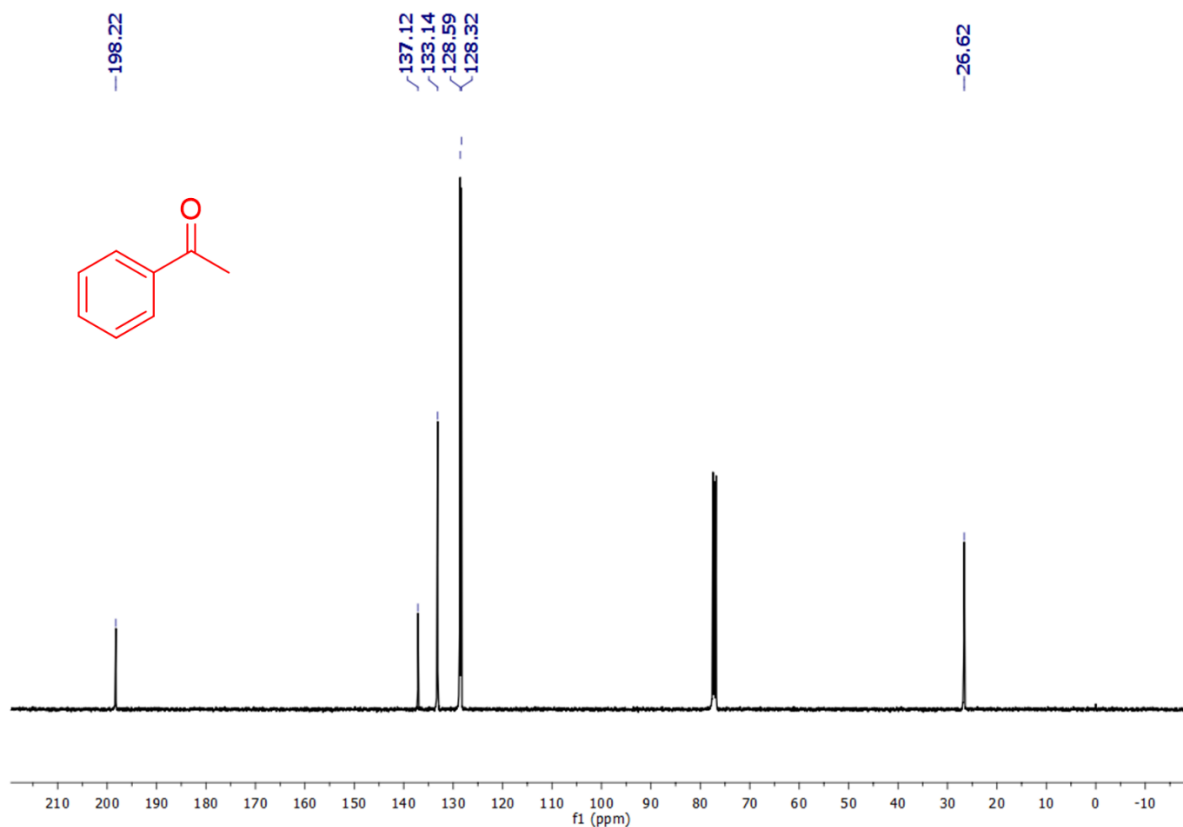

**Figure S13.**  $^{13}\text{C}$  NMR spectrum of acetophenone **2a'** in  $\text{CDCl}_3$  (100 MHz, 293 K).

## Supporting Information

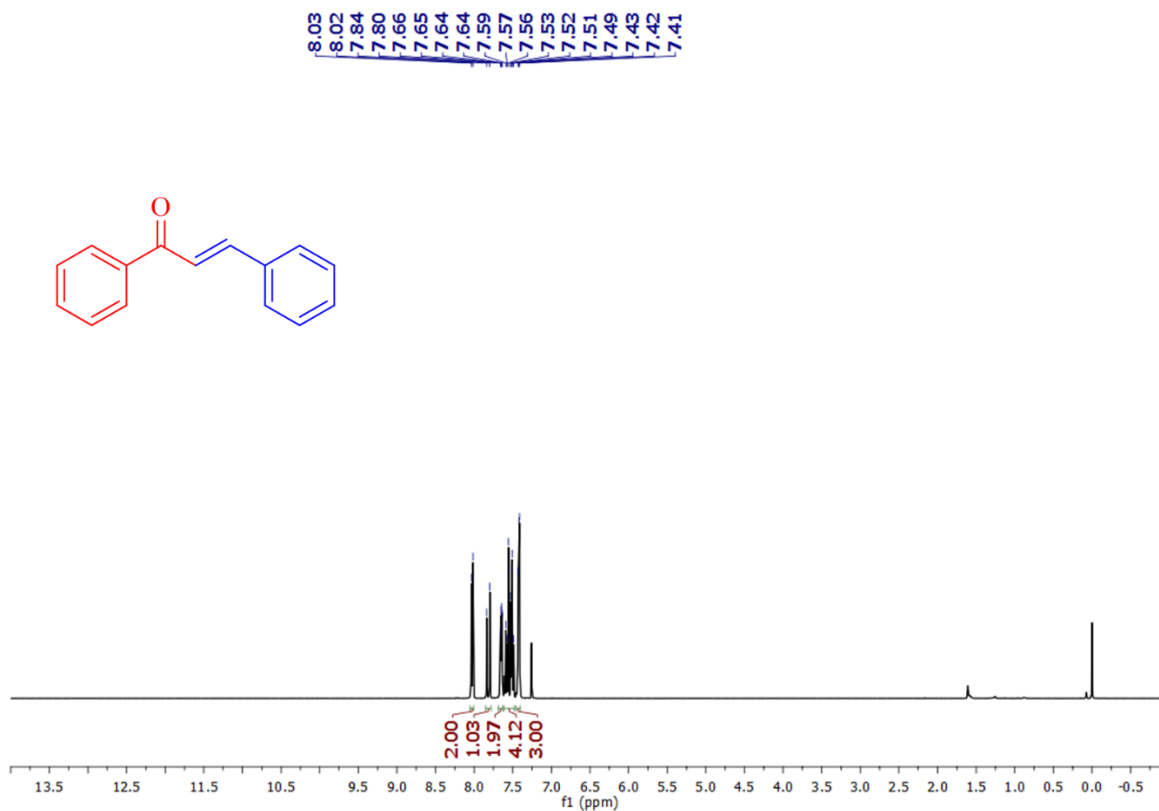

**Figure S14.**  $^1\text{H}$  NMR spectrum of intermediate **3a'** in  $\text{CDCl}_3$  (400 MHz, 293 K).

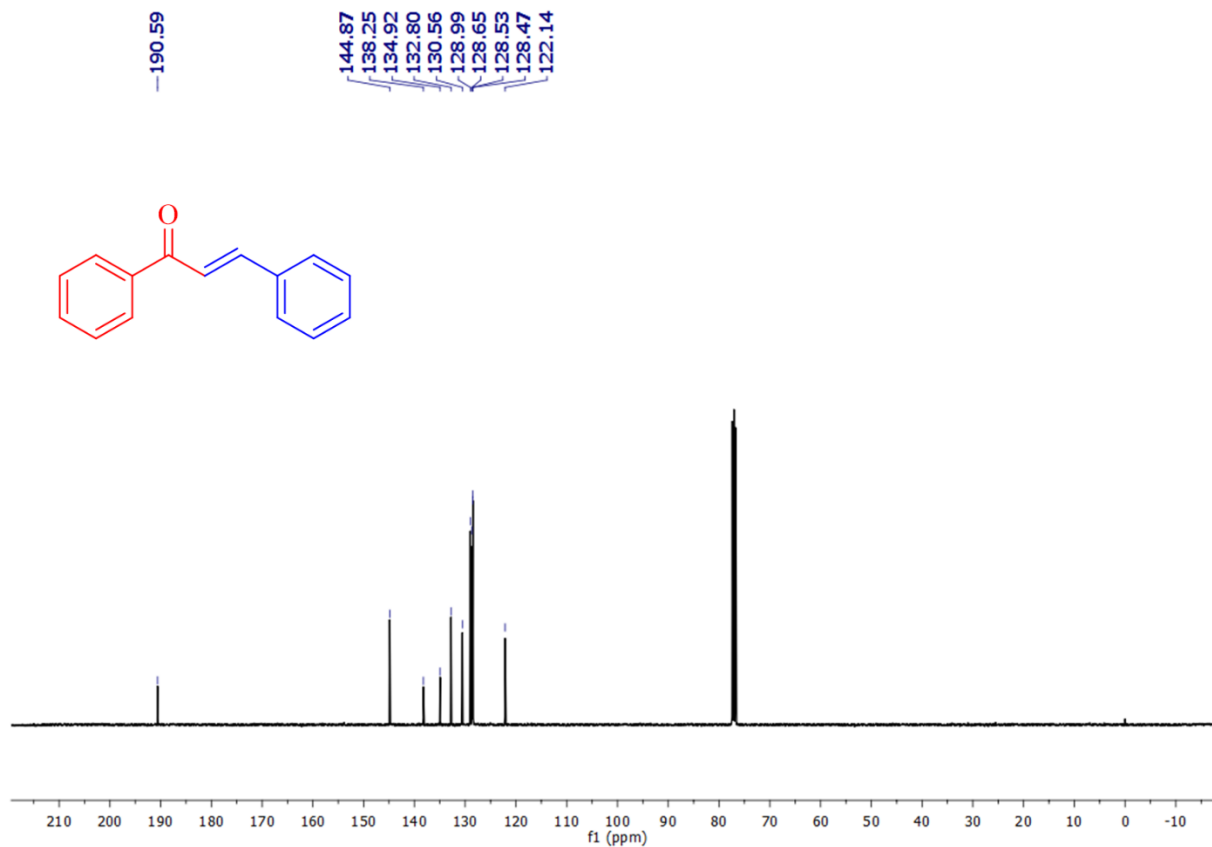

**Figure S15.**  $^{13}\text{C}$  NMR spectrum of intermediate **3a'** in  $\text{CDCl}_3$  (100 MHz, 293 K).

# Supporting Information

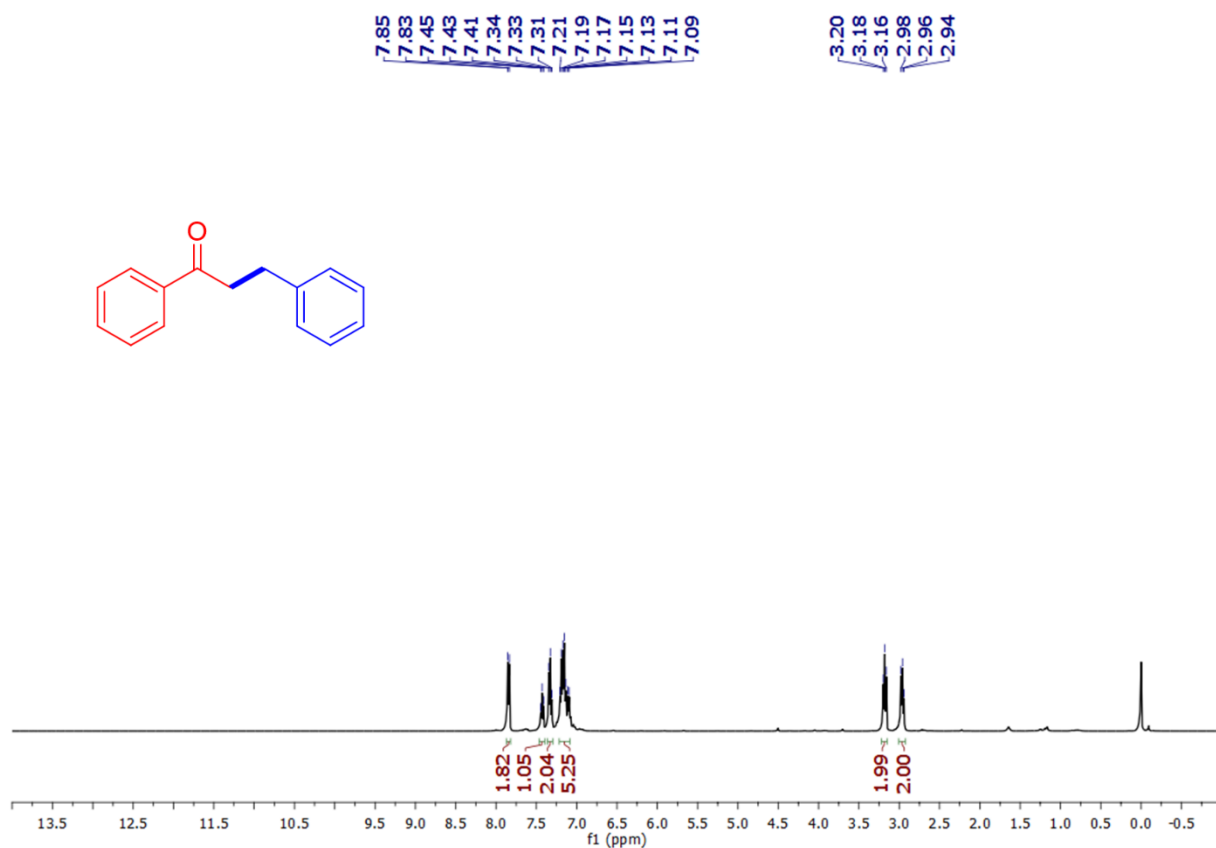

**Figure S16.** <sup>1</sup>H NMR spectrum of compound 3a in CDCl<sub>3</sub> (400 MHz, 293 K).<sup>8</sup>

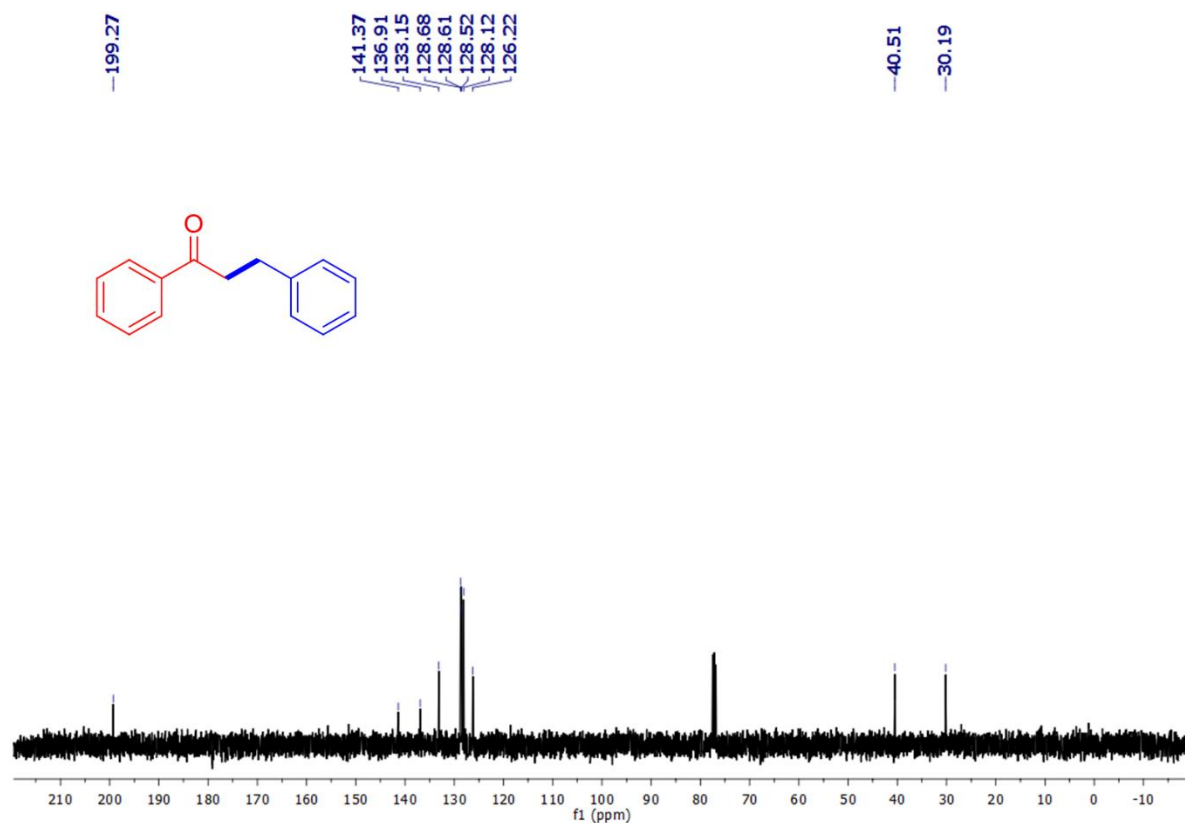

**Figure S17.** <sup>13</sup>C NMR spectrum of compound 3a in CDCl<sub>3</sub> (100 MHz, 293 K).<sup>8</sup>



# Supporting Information

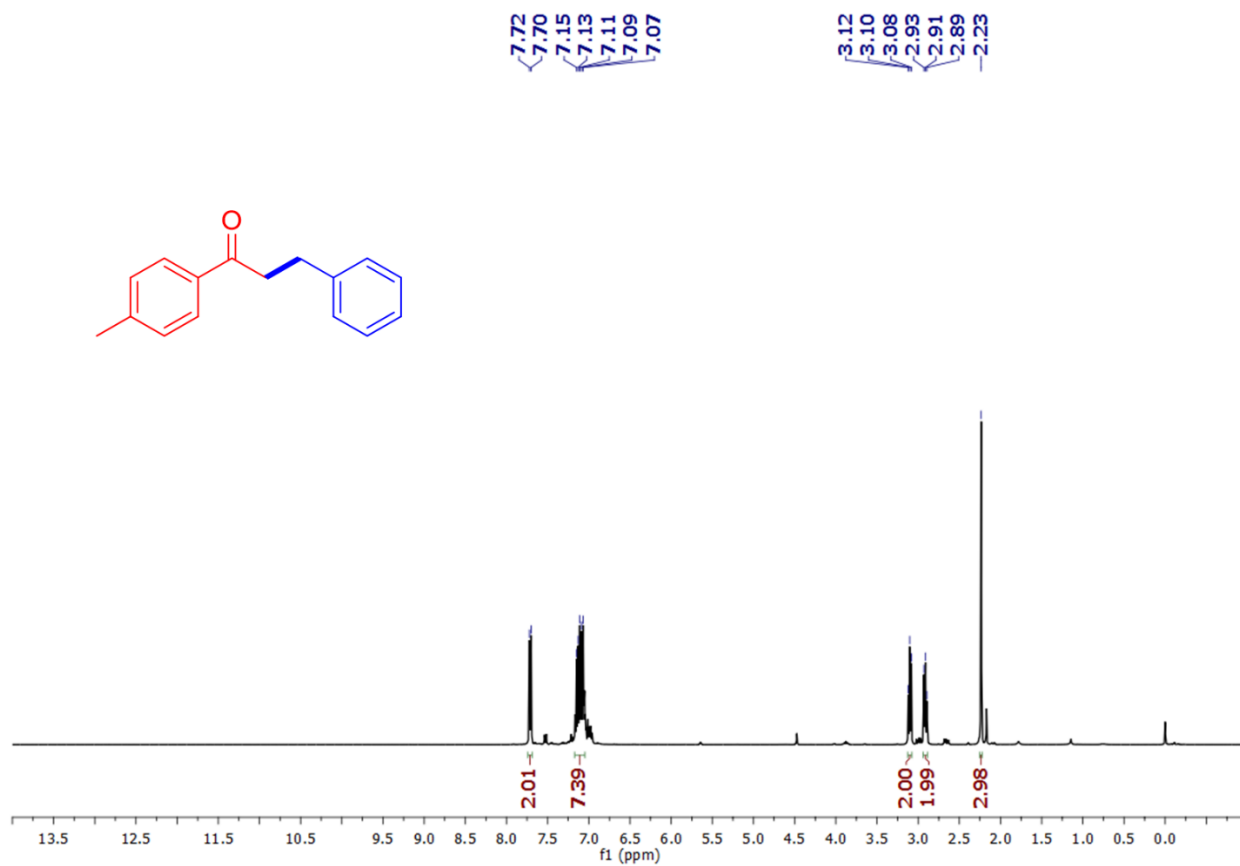

**Figure S18.** <sup>1</sup>H NMR spectrum of compound **3b** in CDCl<sub>3</sub> (400 MHz, 293 K).<sup>8</sup>

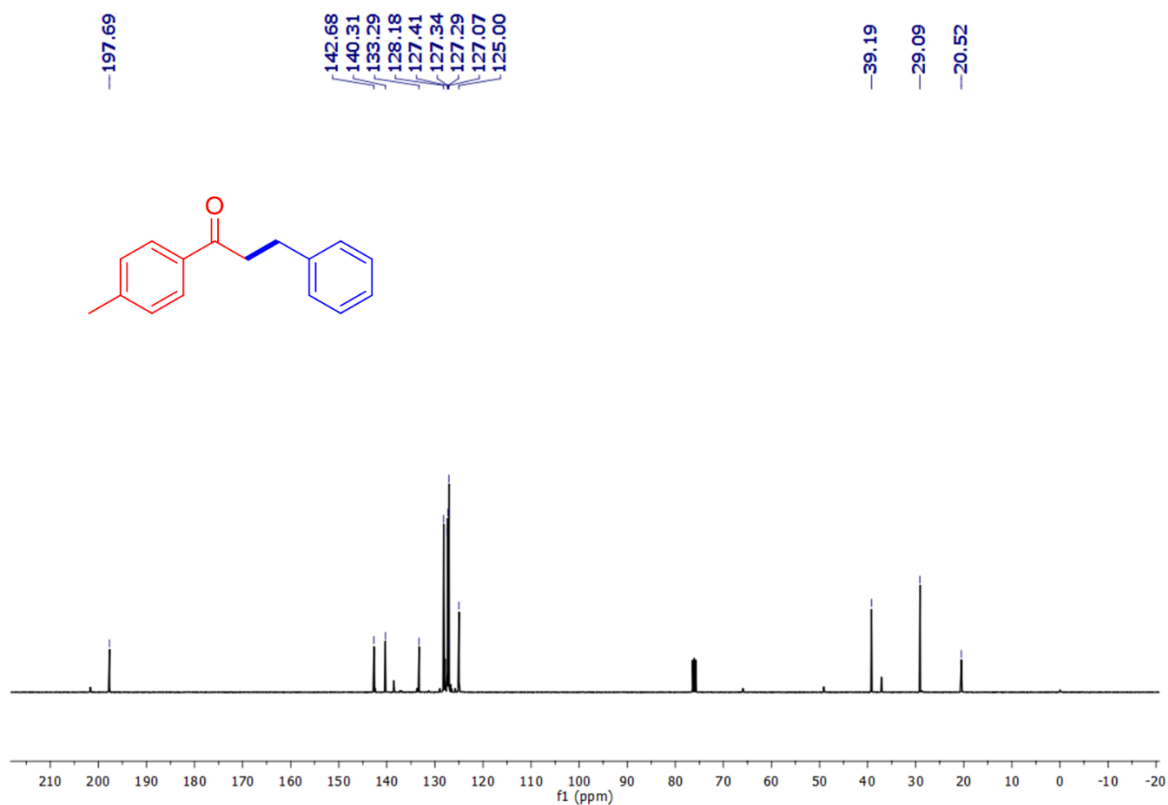

**Figure S19.** <sup>13</sup>C NMR spectrum of compound **3b** in CDCl<sub>3</sub> (100 MHz, 293 K).<sup>8</sup>

# Supporting Information

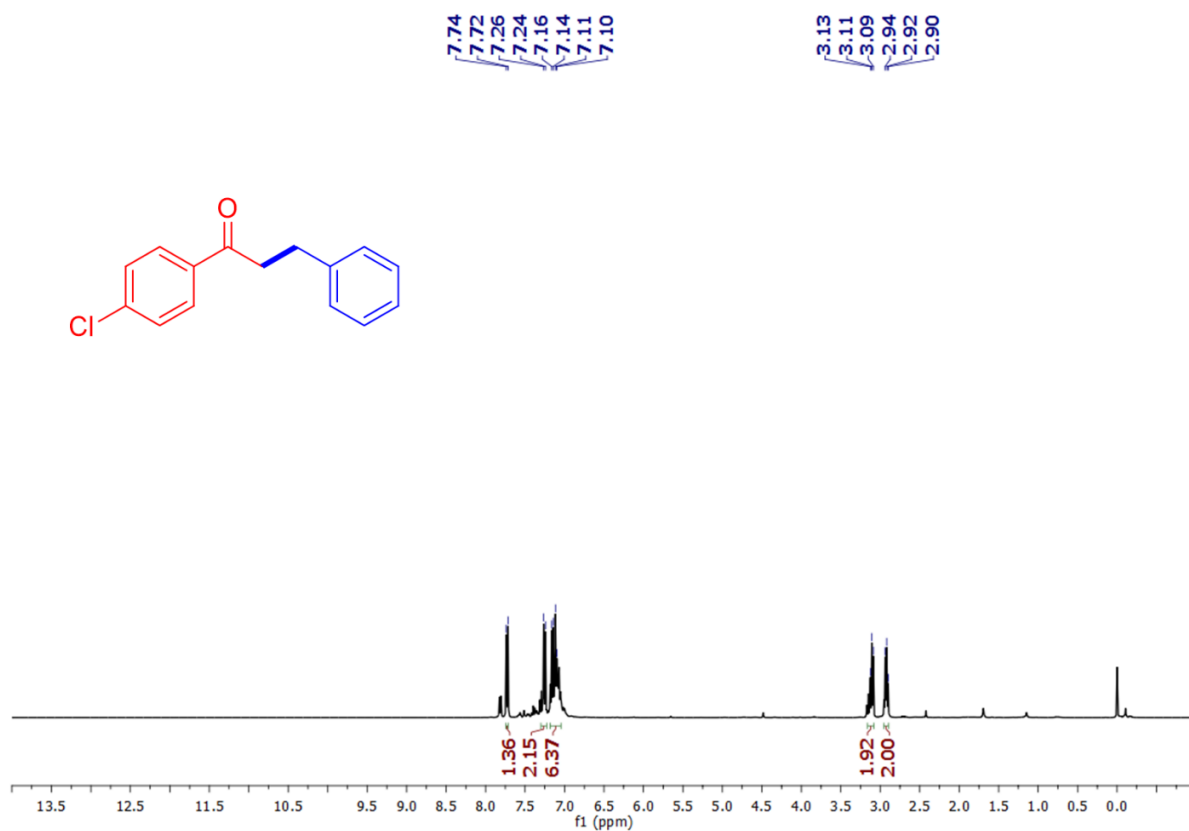

**Figure S20.** <sup>1</sup>H MR spectrum of compound **3c** in CDCl<sub>3</sub> (400 MHz, 293 K).<sup>8</sup>

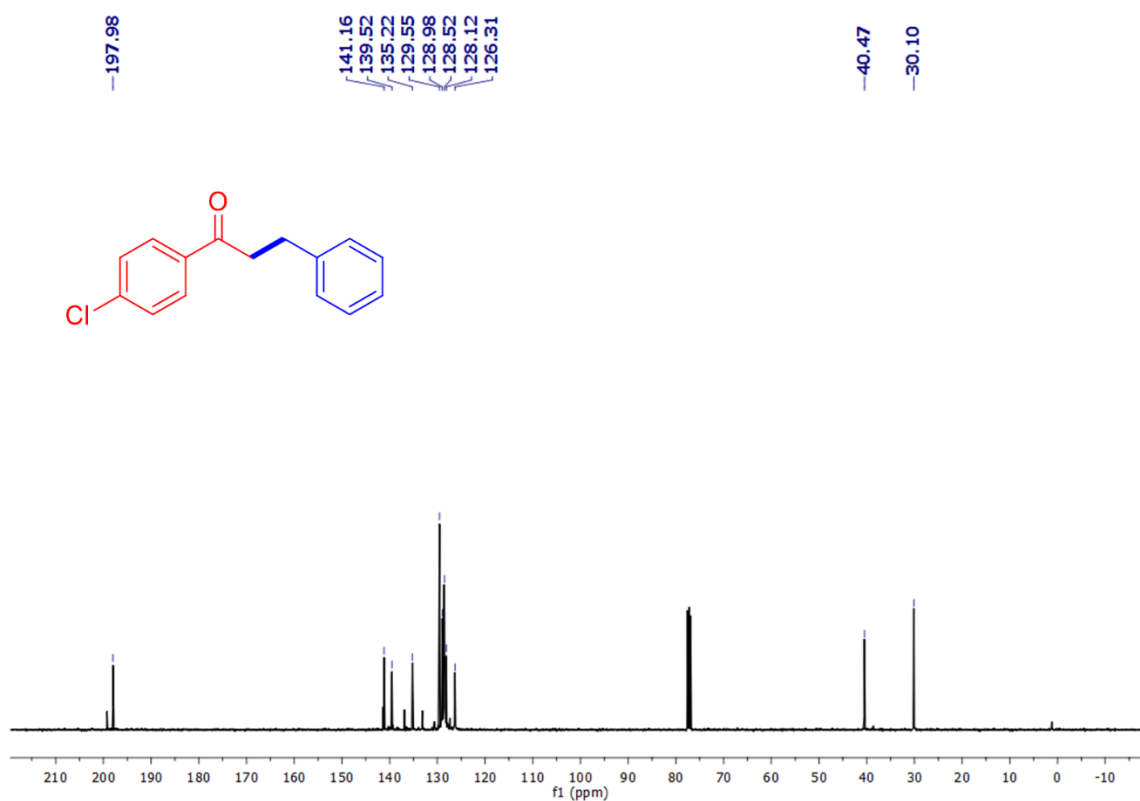

**Figure S21.** <sup>13</sup>C NMR spectrum of compound **3c** in CDCl<sub>3</sub> (100 MHz, 293 K).<sup>8</sup>

# Supporting Information

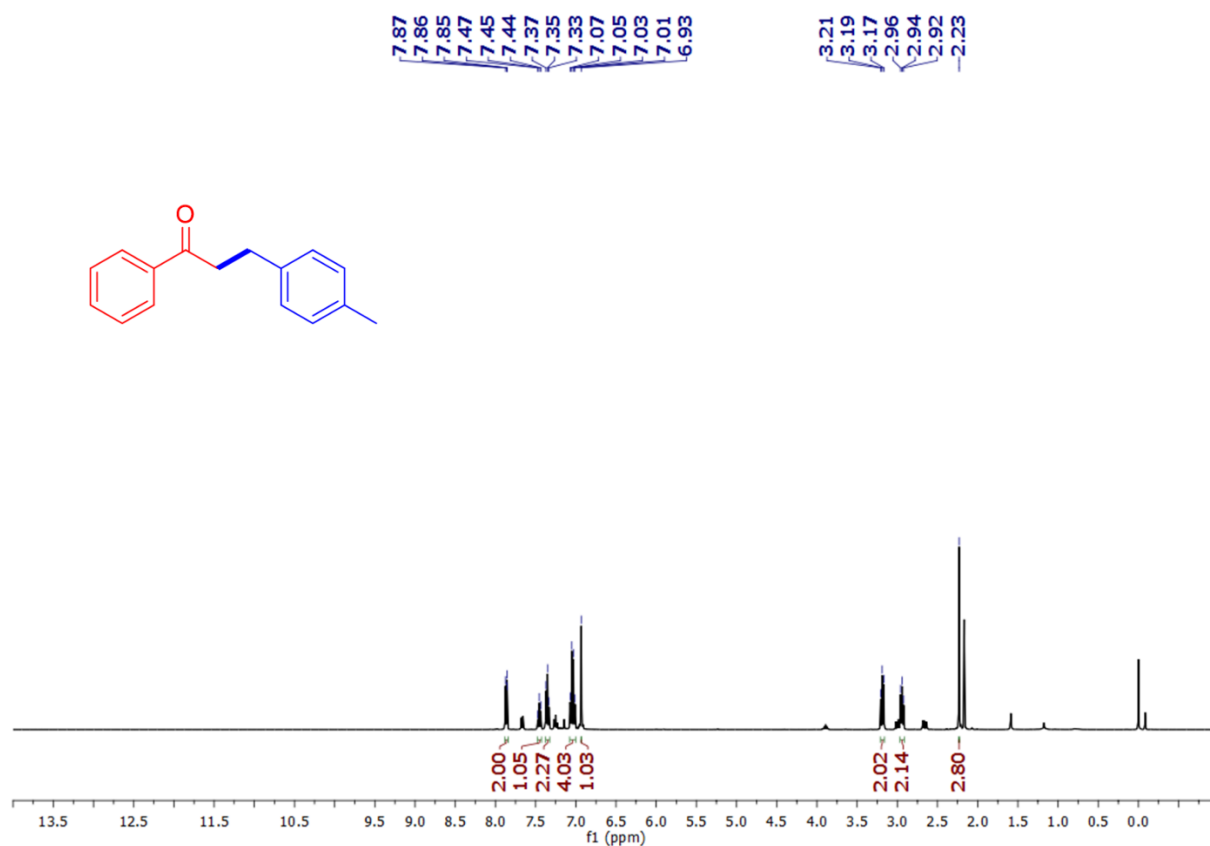

**Figure S22.** <sup>1</sup>H NMR spectrum of compound **3d** in CDCl<sub>3</sub> (400 MHz, 293 K).<sup>8</sup>

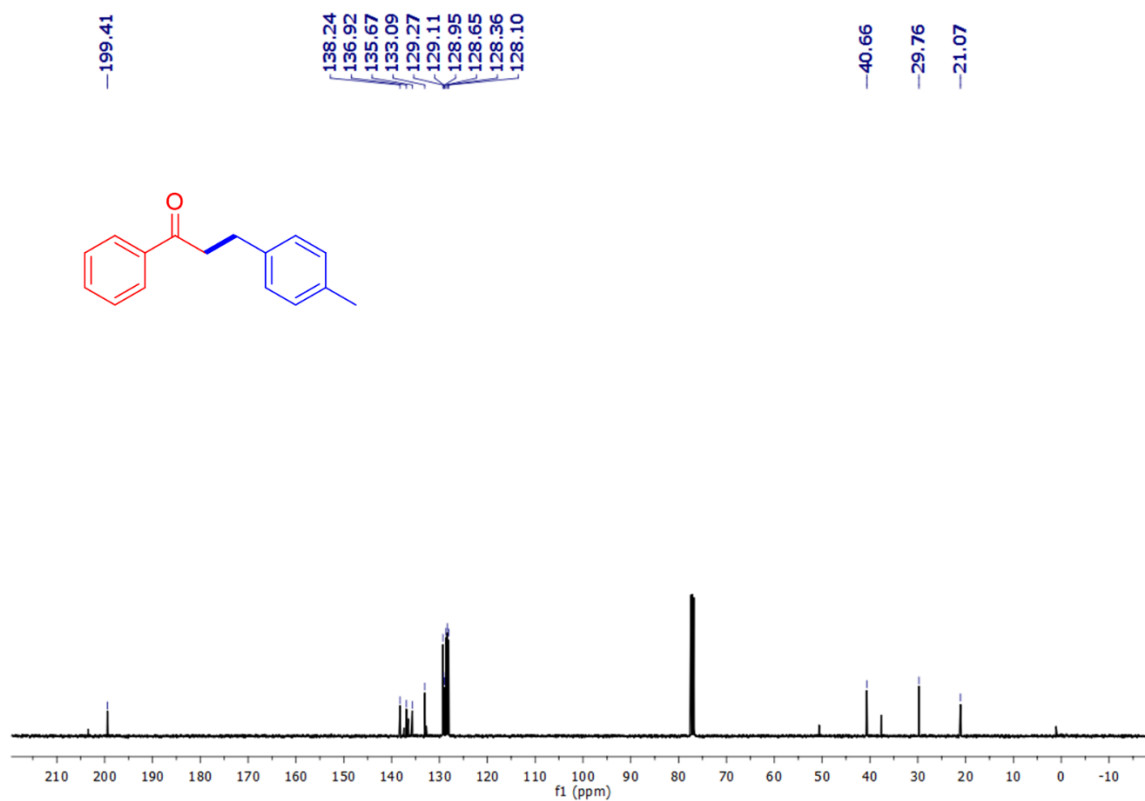

**Figure S23.** <sup>13</sup>C NMR spectrum of compound **3d** in CDCl<sub>3</sub> (100 MHz, 293 K).<sup>8</sup>

## Supporting Information

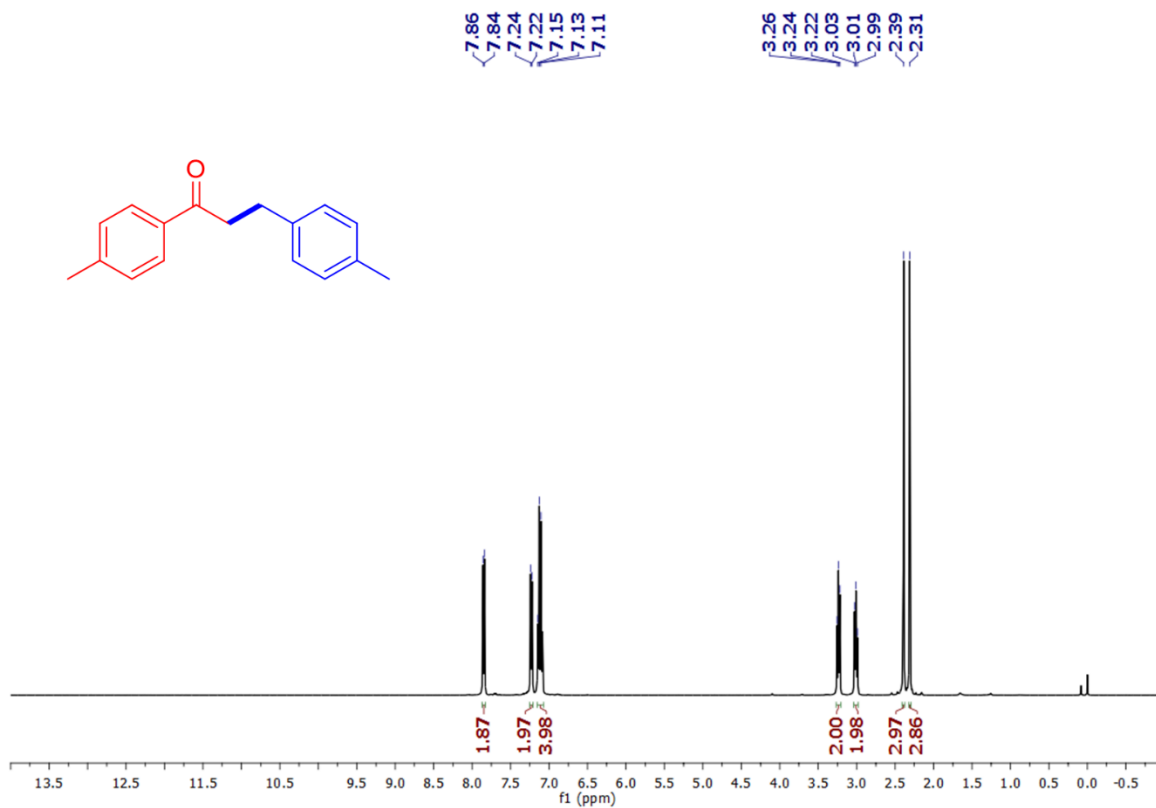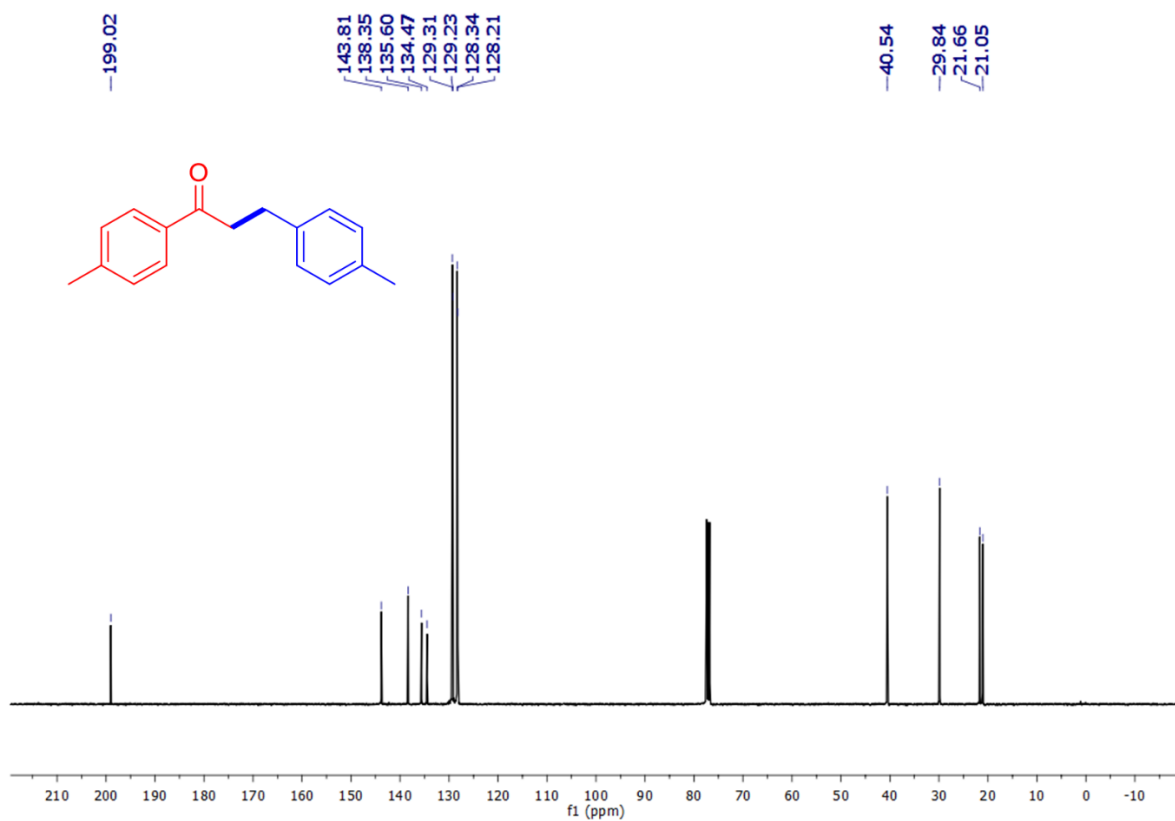

# Supporting Information

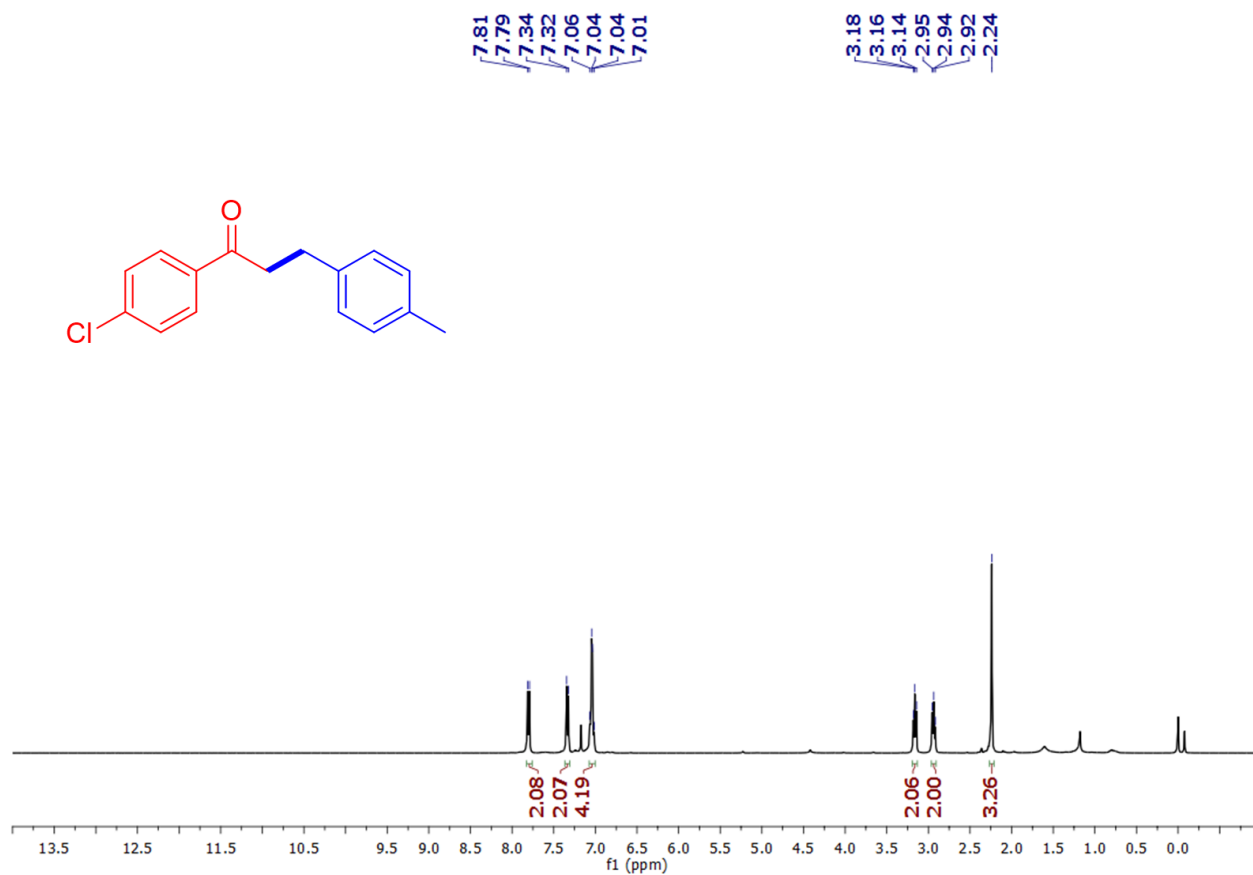

**Figure S26.** <sup>1</sup>H NMR spectrum of compound **3f** in CDCl<sub>3</sub> (400 MHz, 293 K).<sup>22</sup>

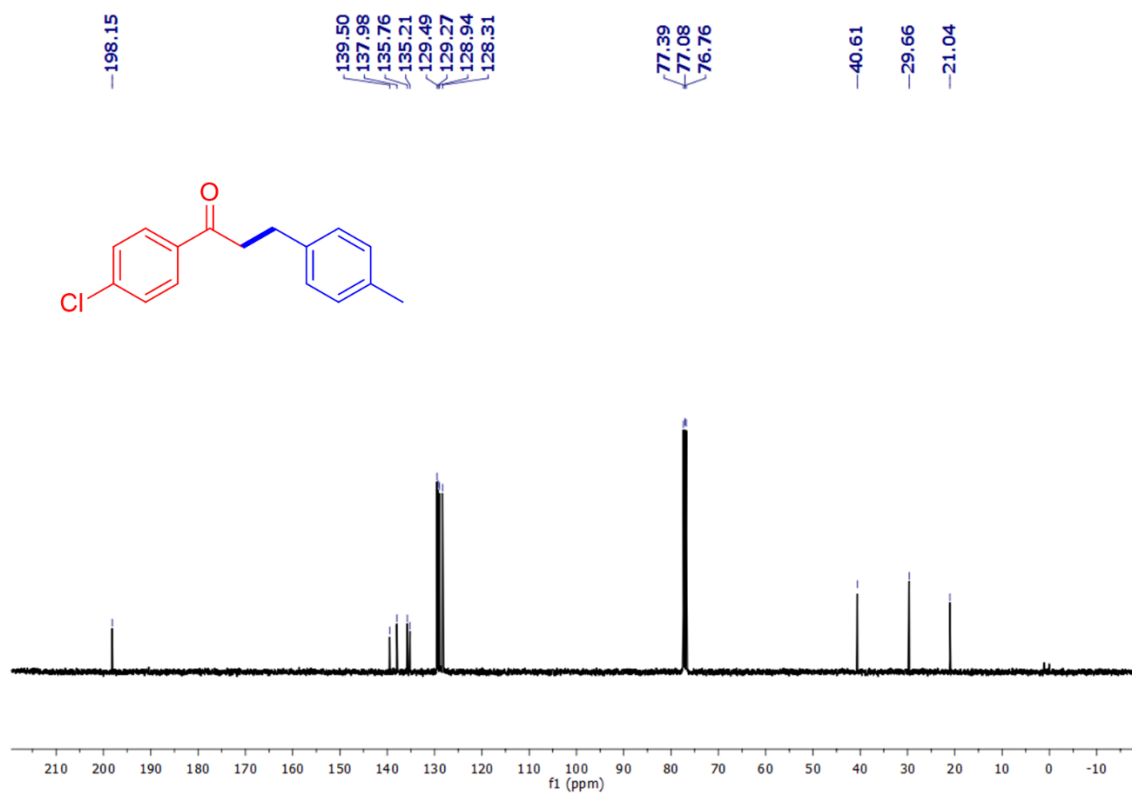

**Figure S27.** <sup>13</sup>C NMR spectrum of compound **3f** in CDCl<sub>3</sub> (100 MHz, 293 K).<sup>22</sup>

## Supporting Information

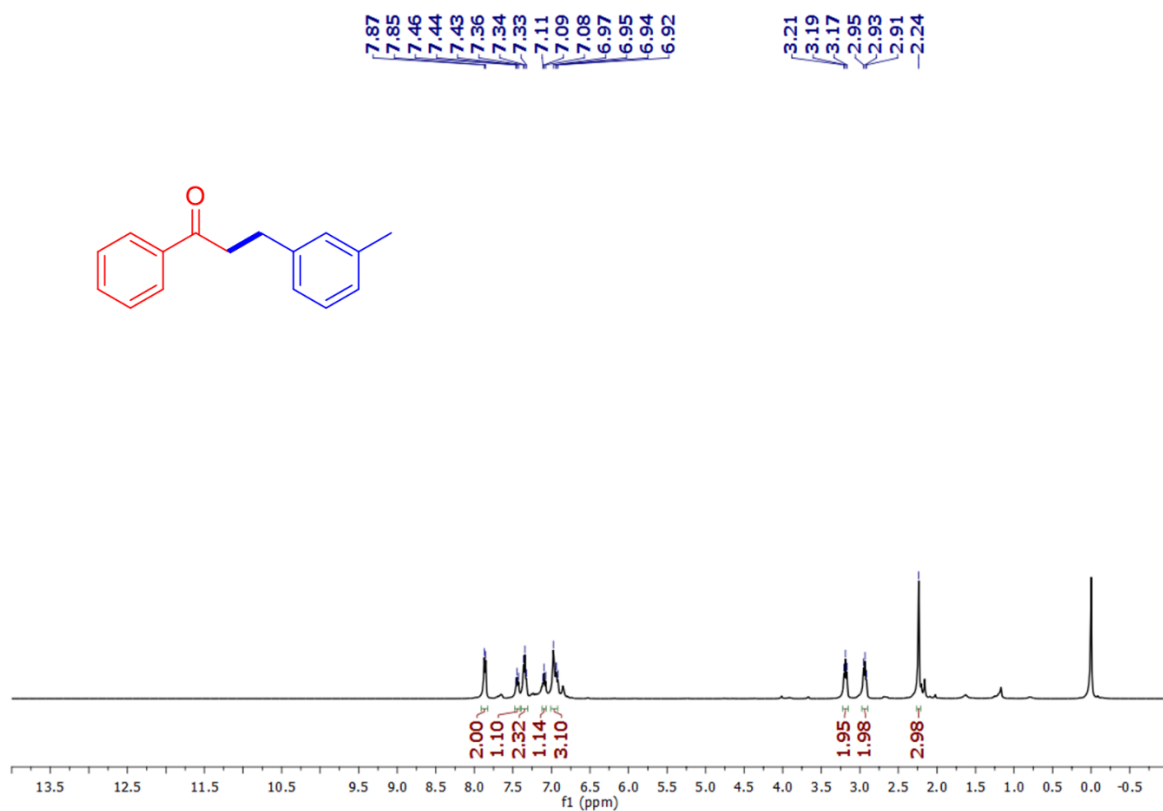

**Figure S28.** <sup>1</sup>H NMR spectrum of compound **3g** in CDCl<sub>3</sub> (400 MHz, 293 K).<sup>12</sup>

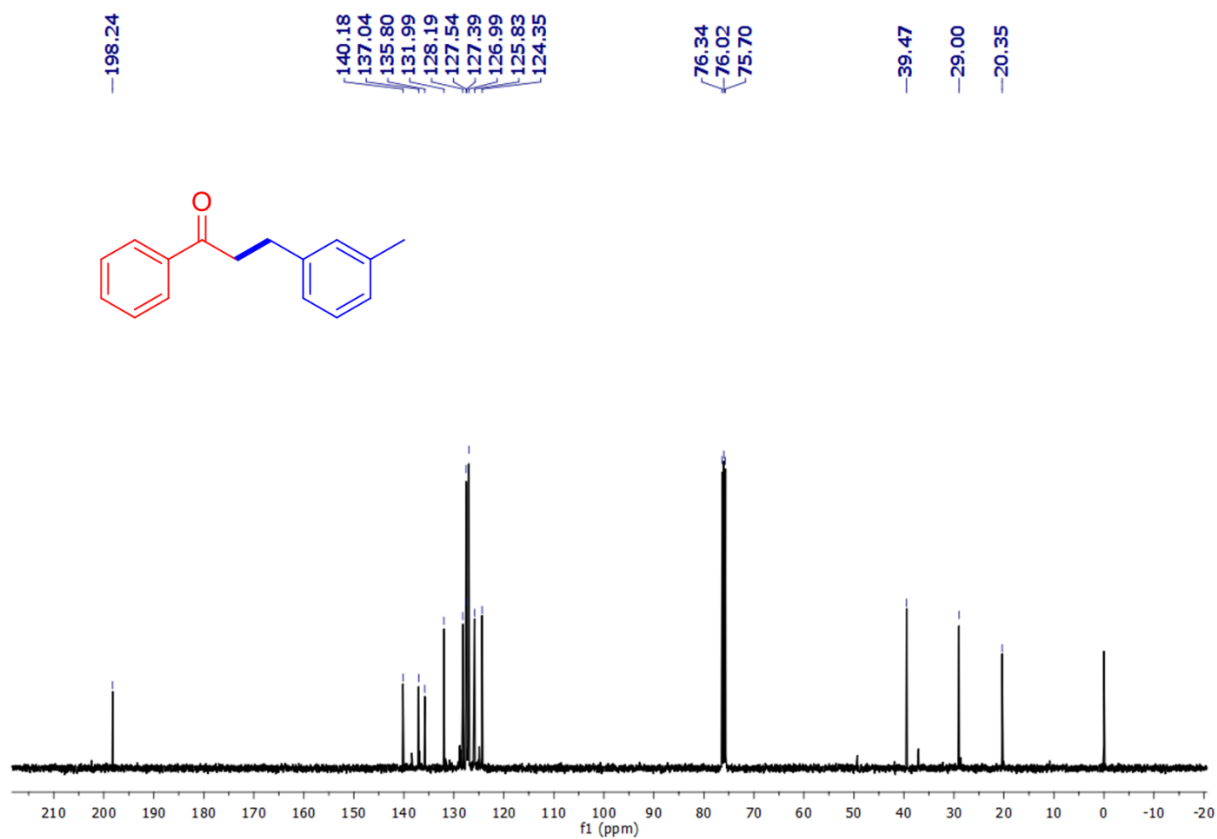

**Figure S29.** <sup>13</sup>C NMR spectrum of compound **3g** in CDCl<sub>3</sub> (100 MHz, 293 K).<sup>12</sup>

# Supporting Information

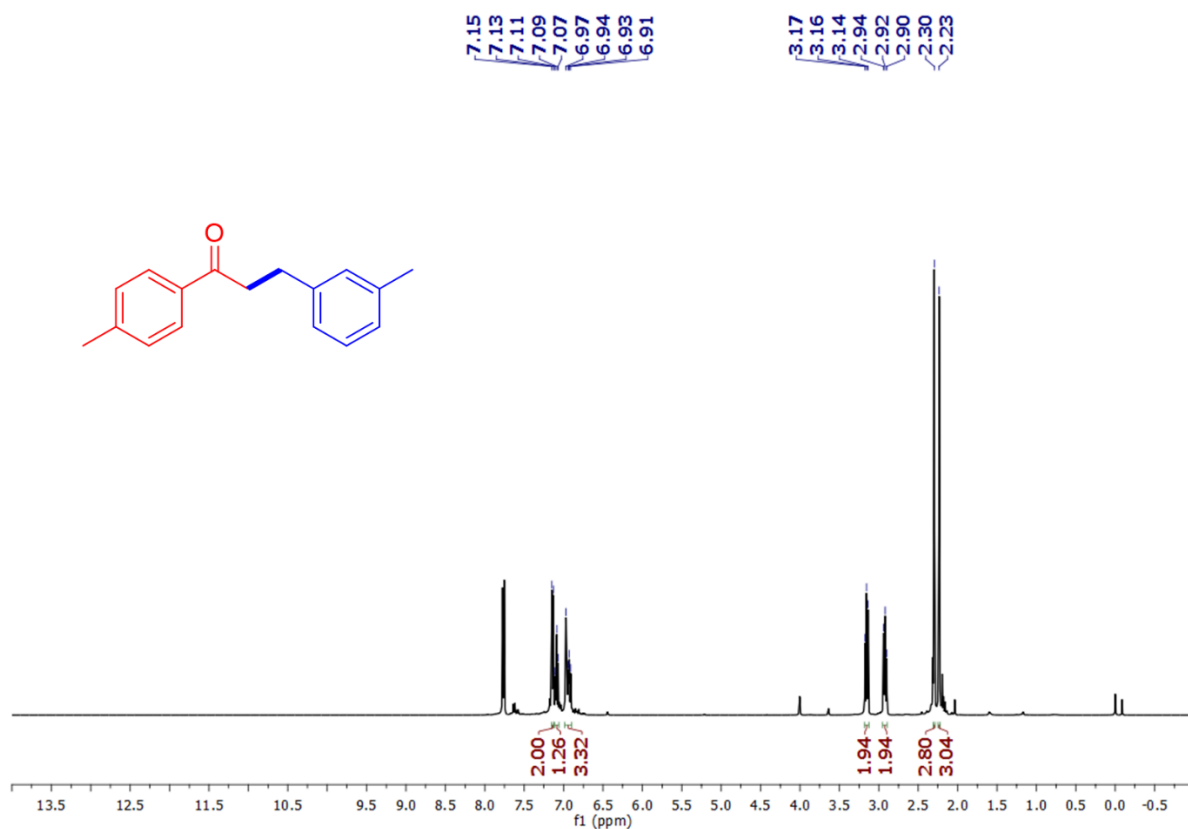

**Figure S30.** <sup>1</sup>H NMR spectrum of compound **3h** in CDCl<sub>3</sub> (400 MHz, 293 K).

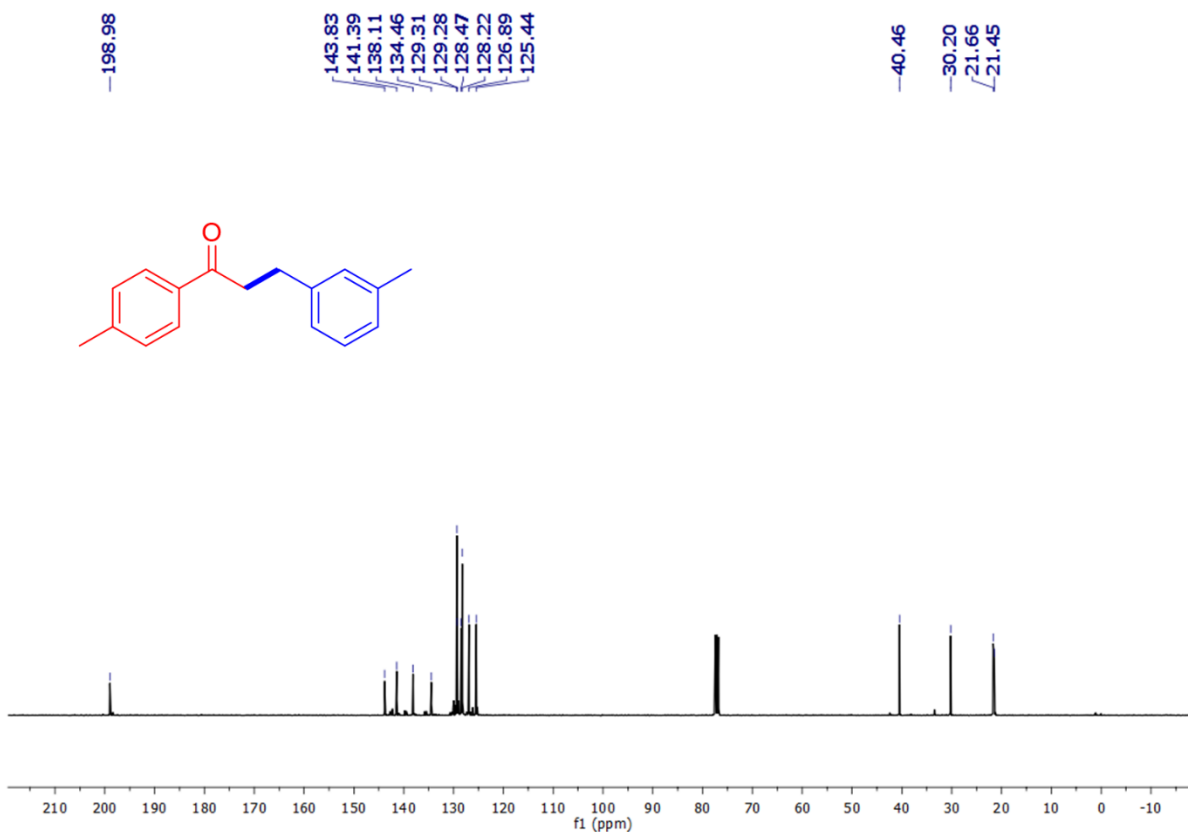

**Figure S31.** <sup>13</sup>C NMR spectrum of compound **3h** in CDCl<sub>3</sub> (100 MHz, 293 K).

# Supporting Information

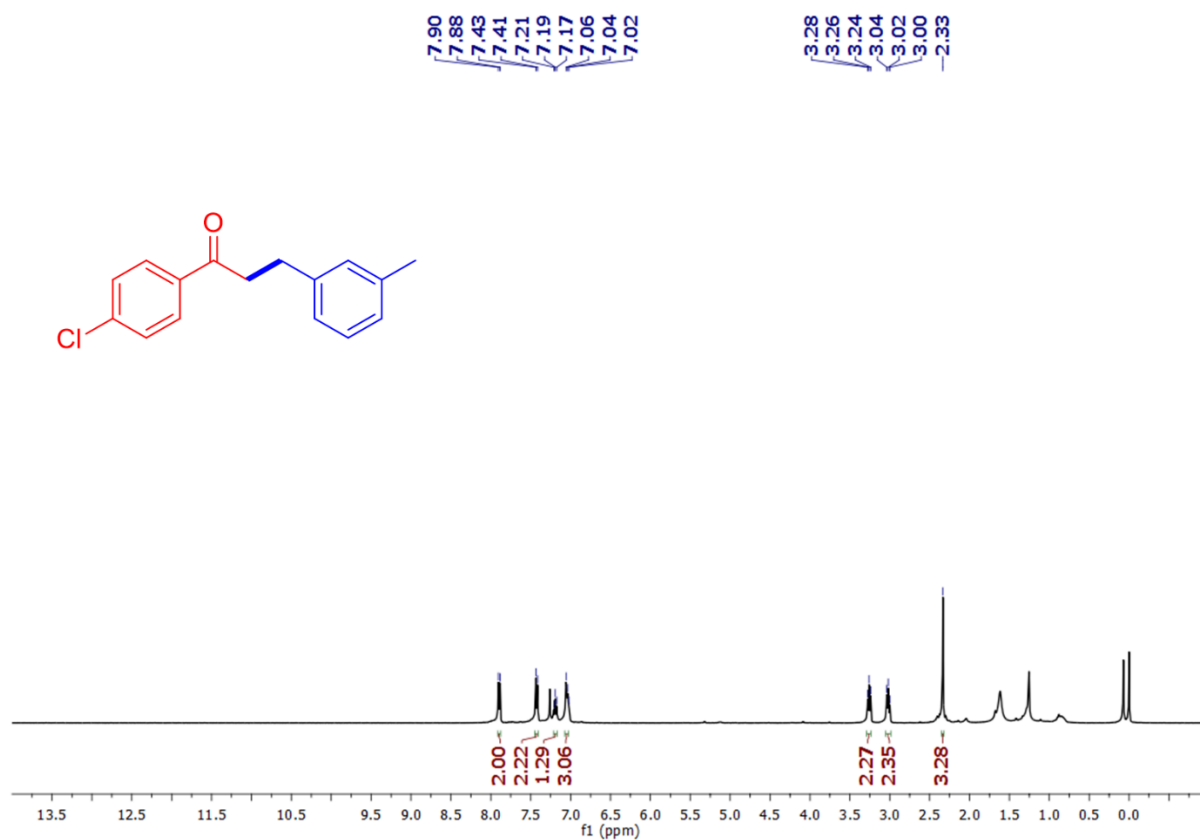

**Figure S32.** <sup>1</sup>H NMR spectrum of compound **3i** in CDCl<sub>3</sub> (400 MHz, 293 K).

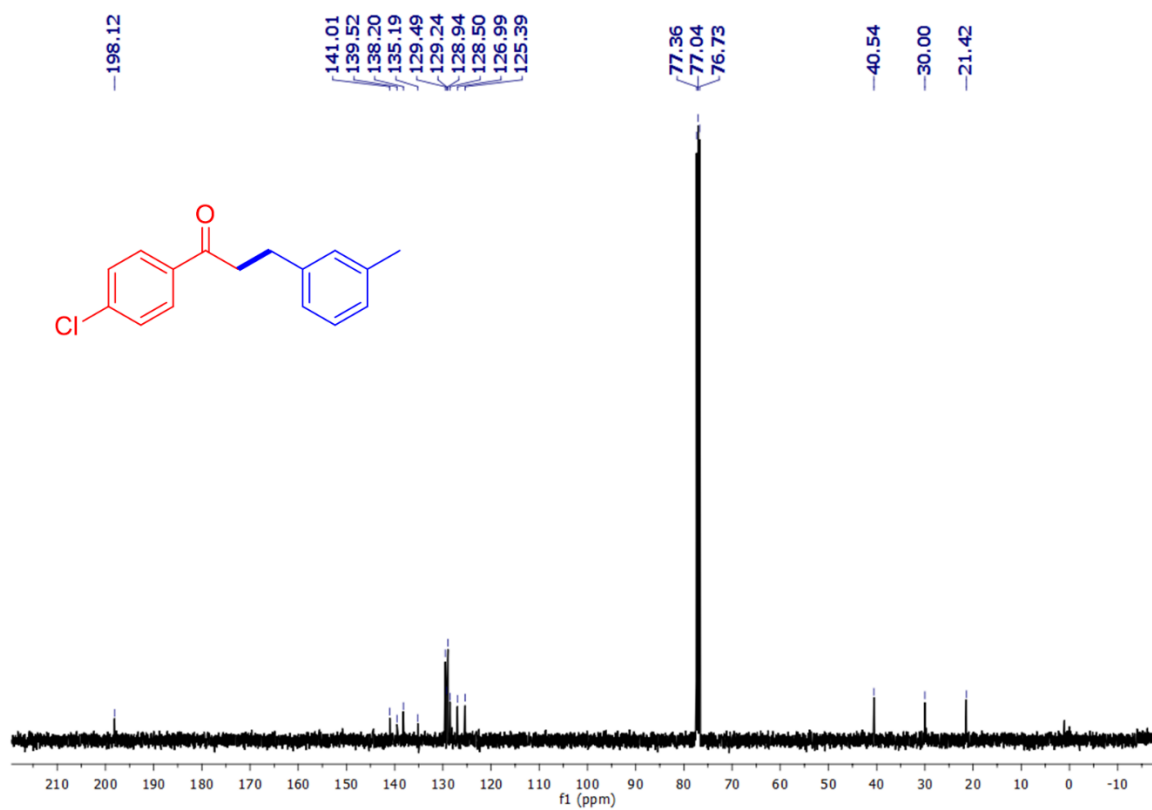

**Figure S33.** <sup>13</sup>C NMR spectrum of compound **3i** in CDCl<sub>3</sub> (100 MHz, 293 K).



# Supporting Information

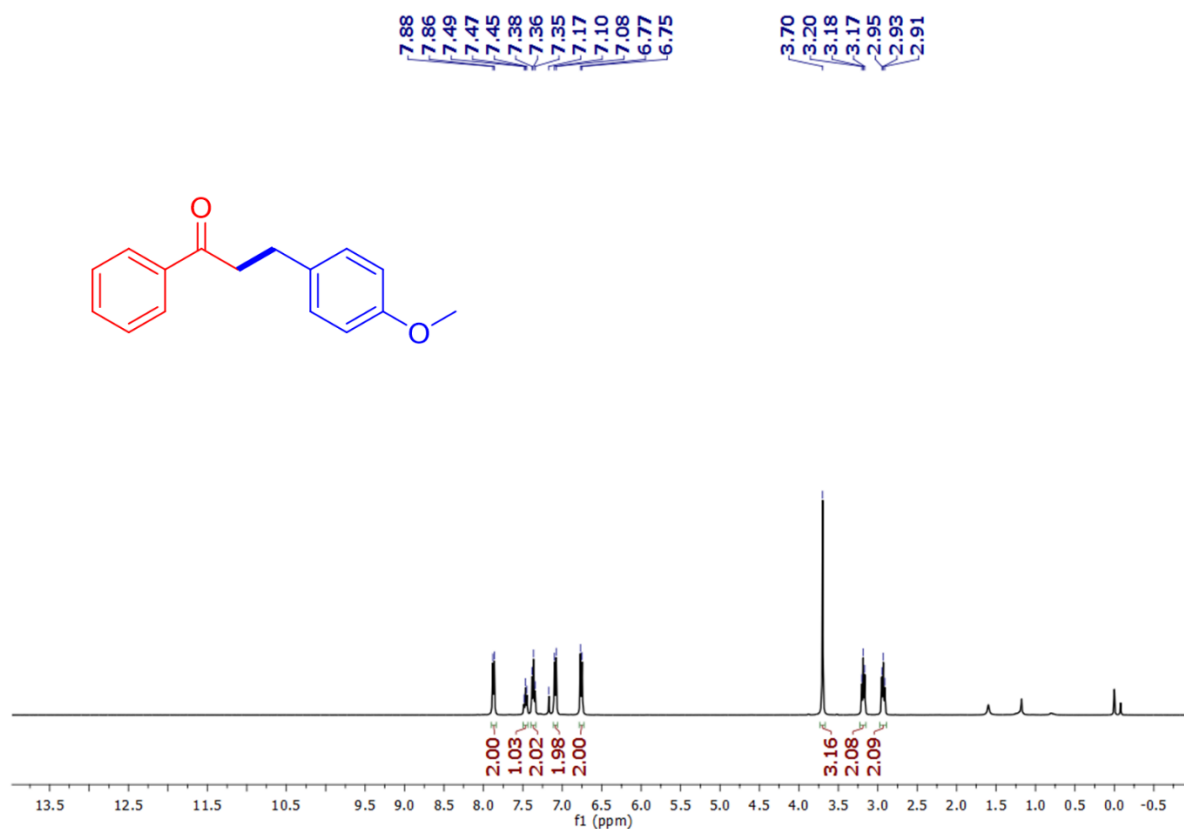

**Figure S34.**  $^1\text{H}$  NMR spectrum of compound **3j** in  $\text{CDCl}_3$  (400 MHz, 293 K).<sup>8</sup>

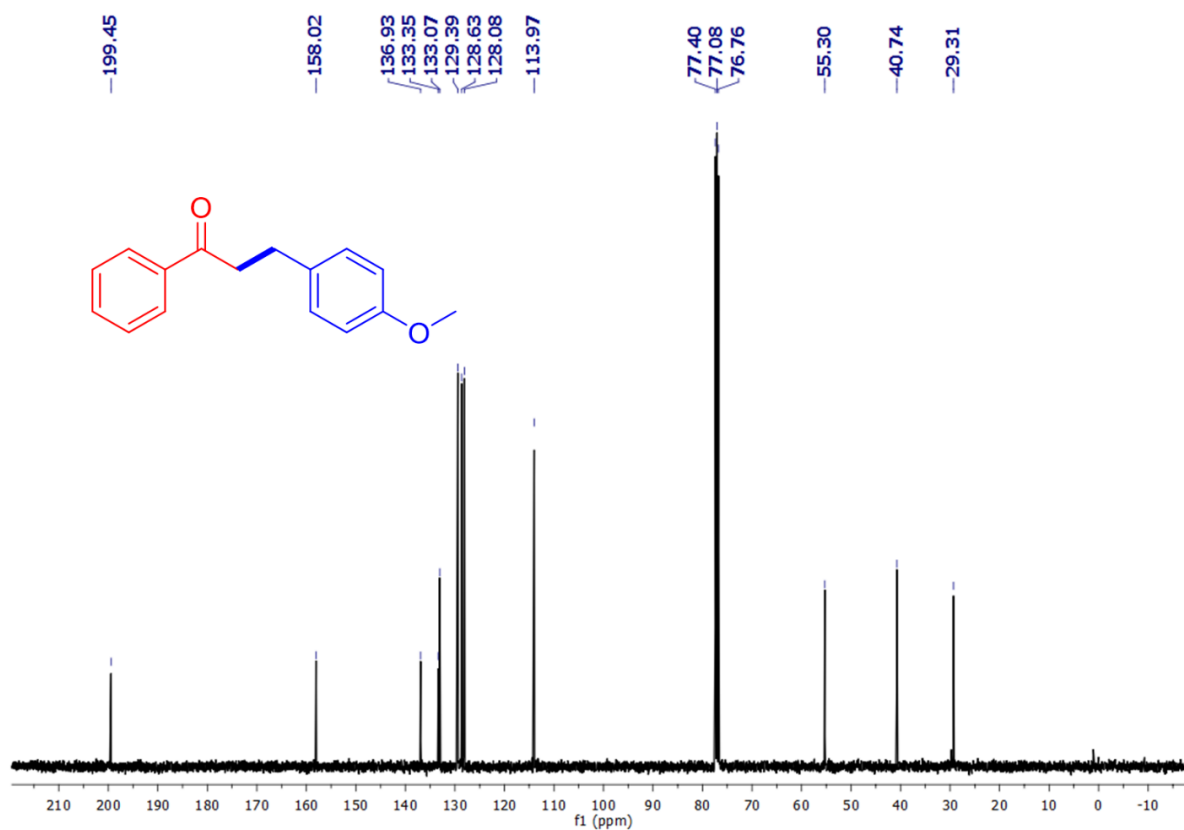

**Figure S35.**  $^{13}\text{C}$  NMR spectrum of compound **3j** in  $\text{CDCl}_3$  (100 MHz, 293 K).<sup>8</sup>

# Supporting Information

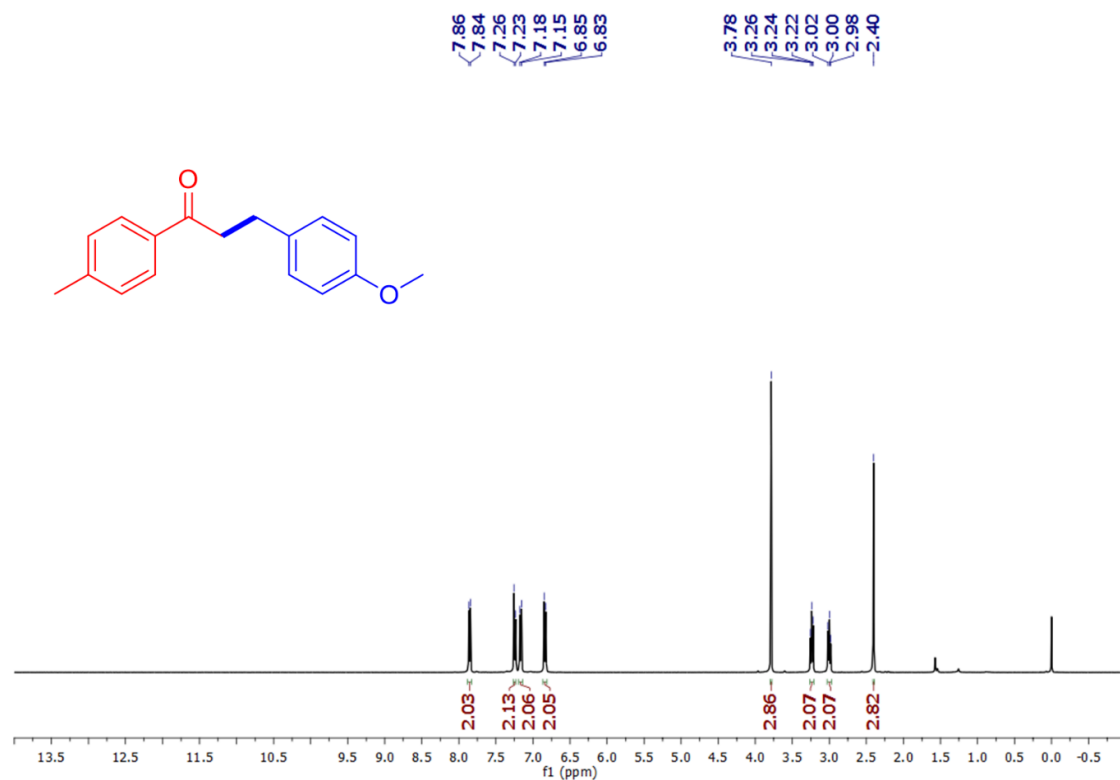

**Figure S36.**  $^1\text{H}$  NMR spectrum of compound **3k** in  $\text{CDCl}_3$  (400 MHz, 293 K).<sup>22</sup>

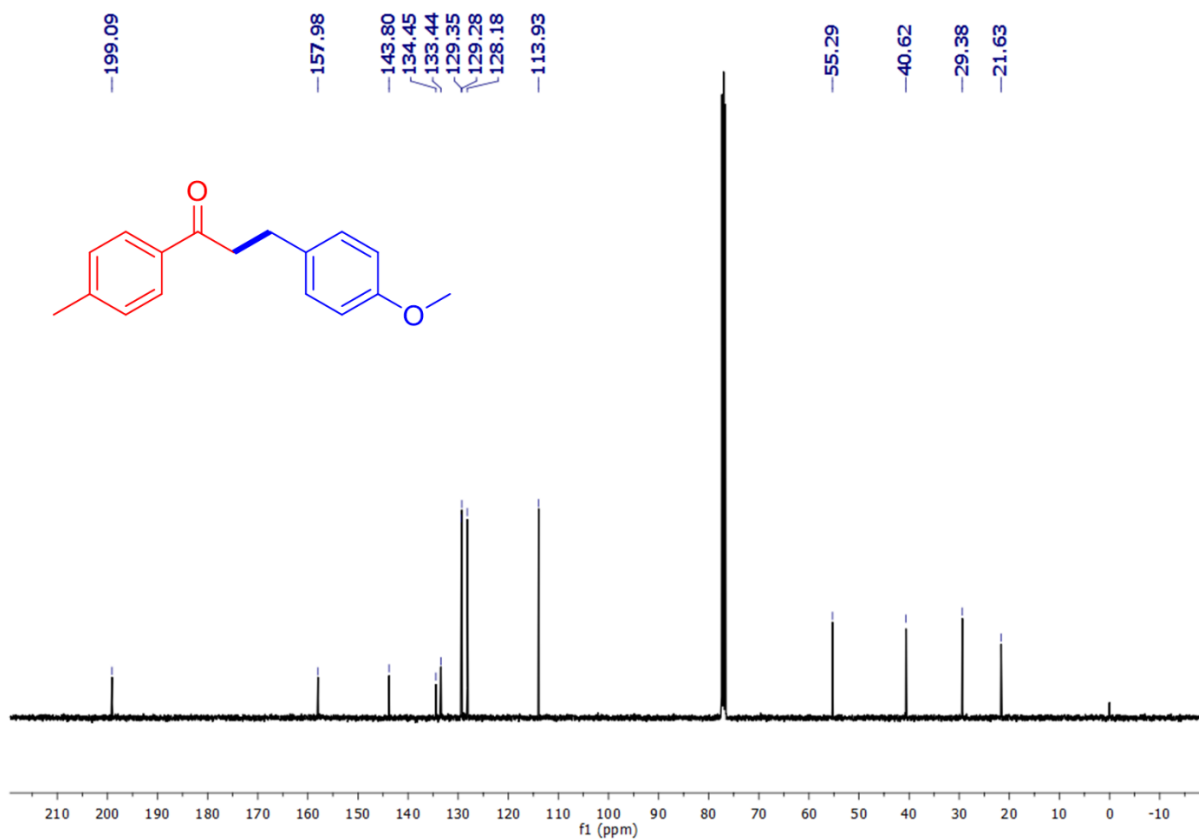

**Figure S37.**  $^{13}\text{C}$  NMR spectrum of compound **3k** in  $\text{CDCl}_3$  (100 MHz, 293 K).<sup>22</sup>

## Supporting Information

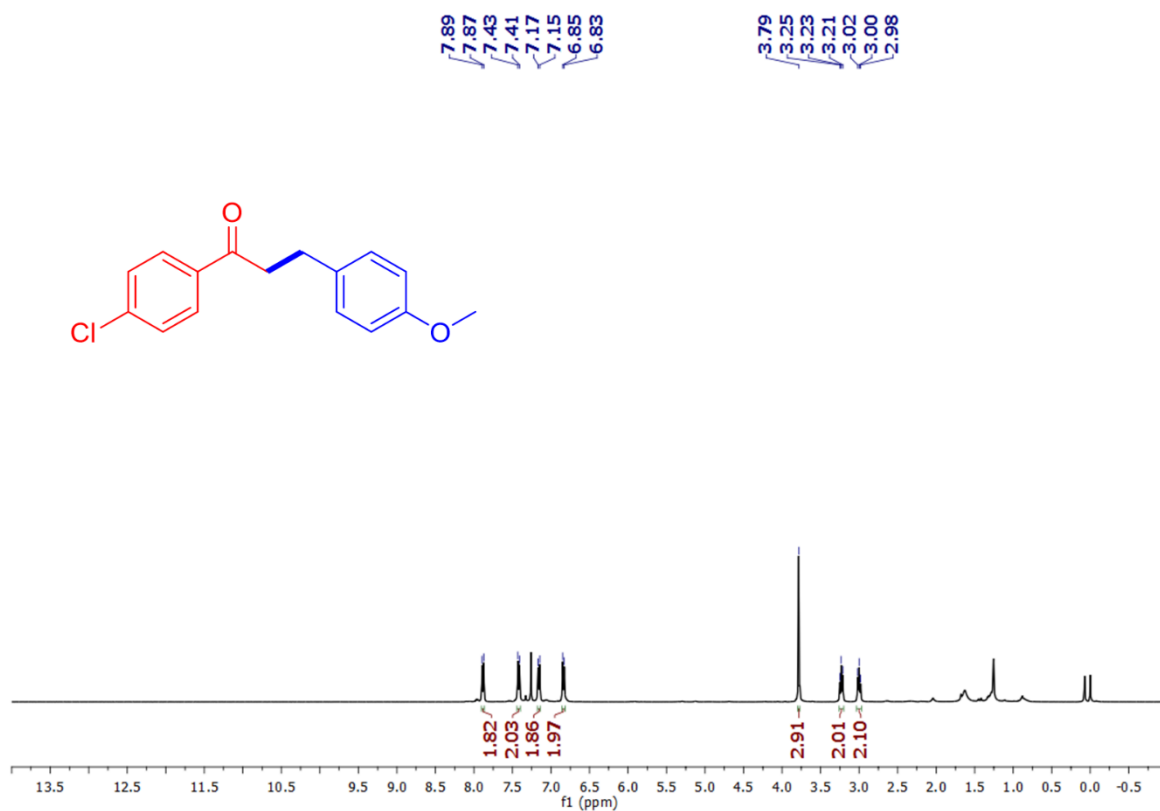

**Figure S38.** <sup>1</sup>H NMR spectrum of compound **3I** in CDCl<sub>3</sub> (400 MHz, 293 K).<sup>22</sup>

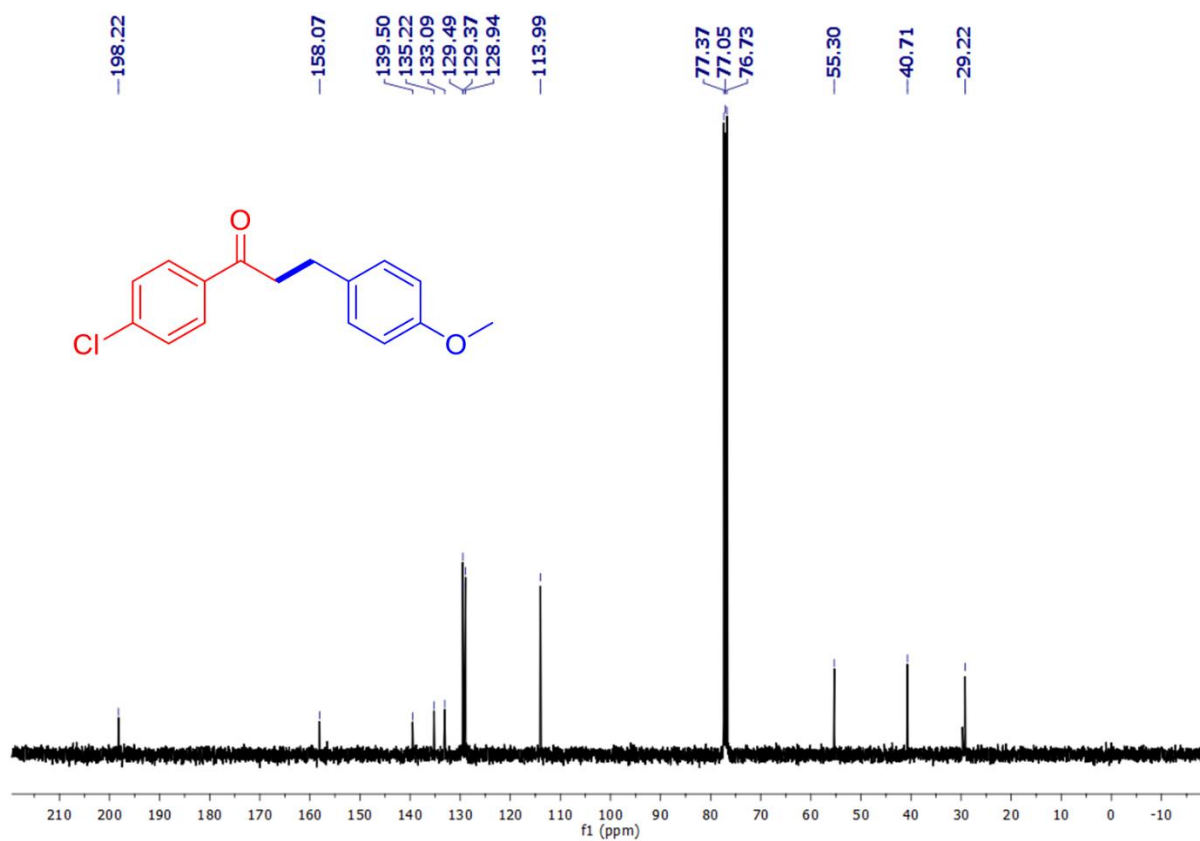

**Figure S39.** <sup>13</sup>C NMR spectrum of compound **3I** in CDCl<sub>3</sub> (100 MHz, 293 K).<sup>22</sup>

# Supporting Information

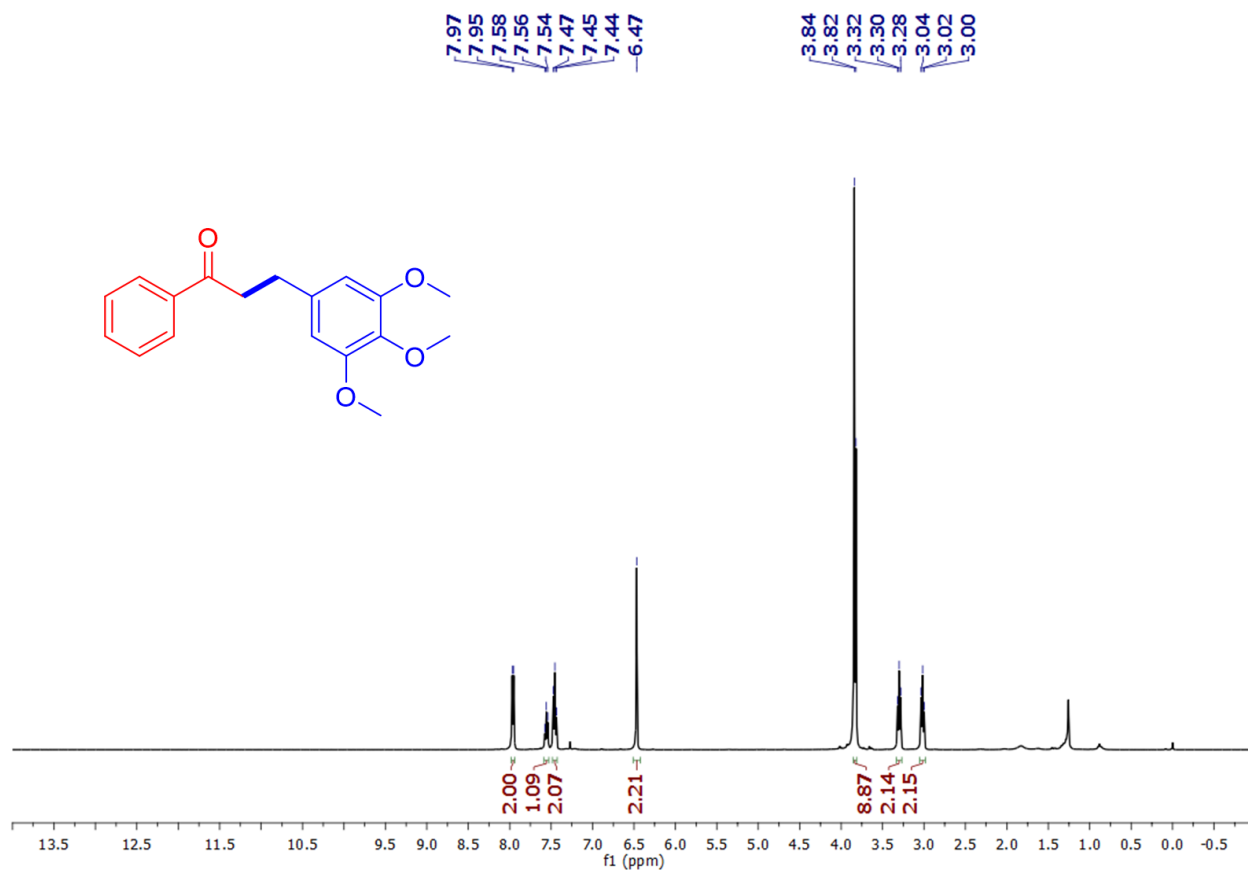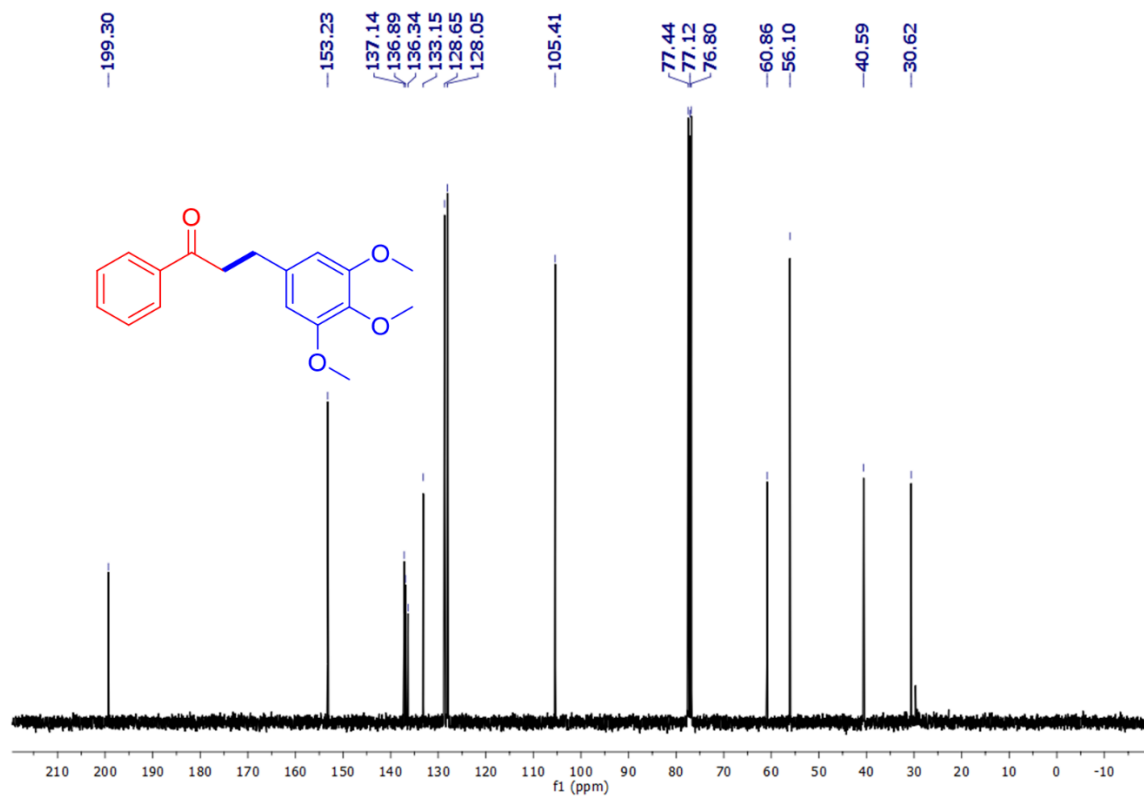

# Supporting Information

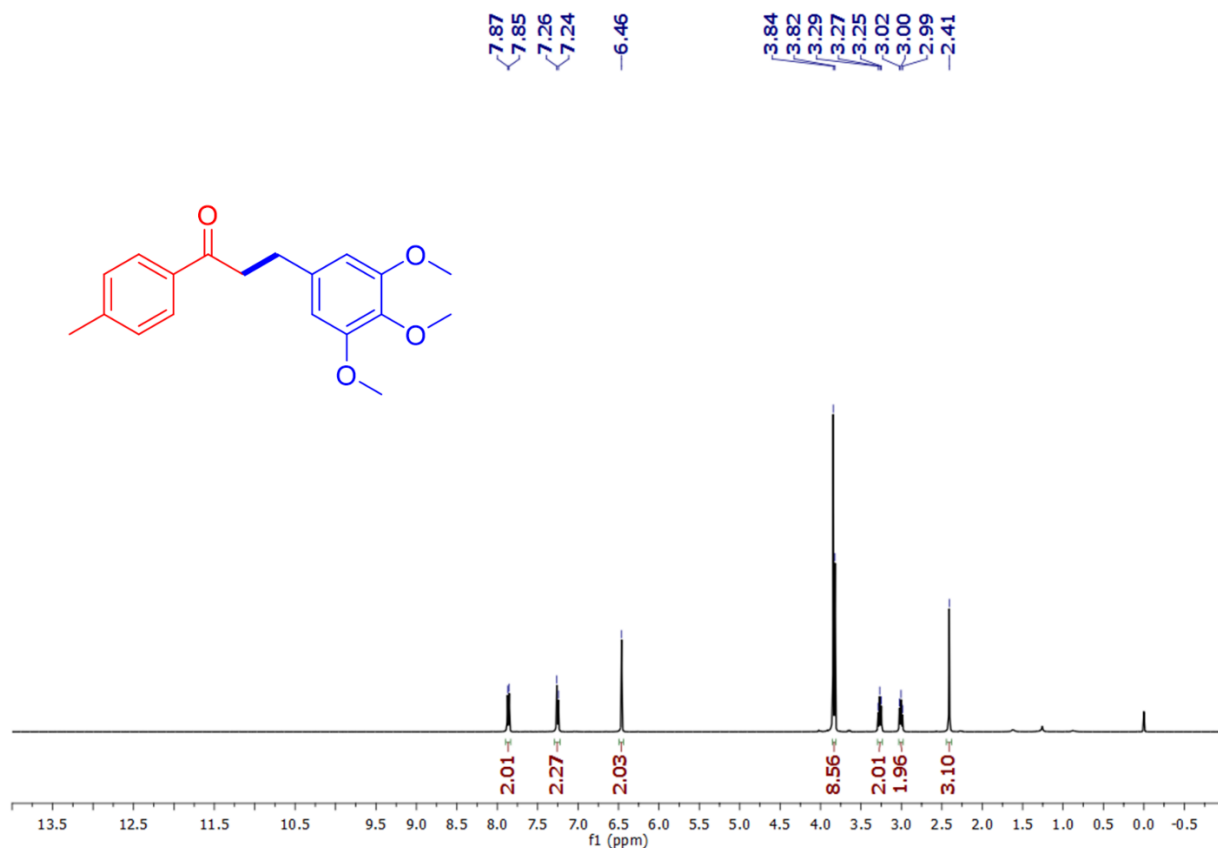

**Figure S42.** <sup>1</sup>H NMR spectrum of compound **3n** in CDCl<sub>3</sub> (400 MHz, 293 K).

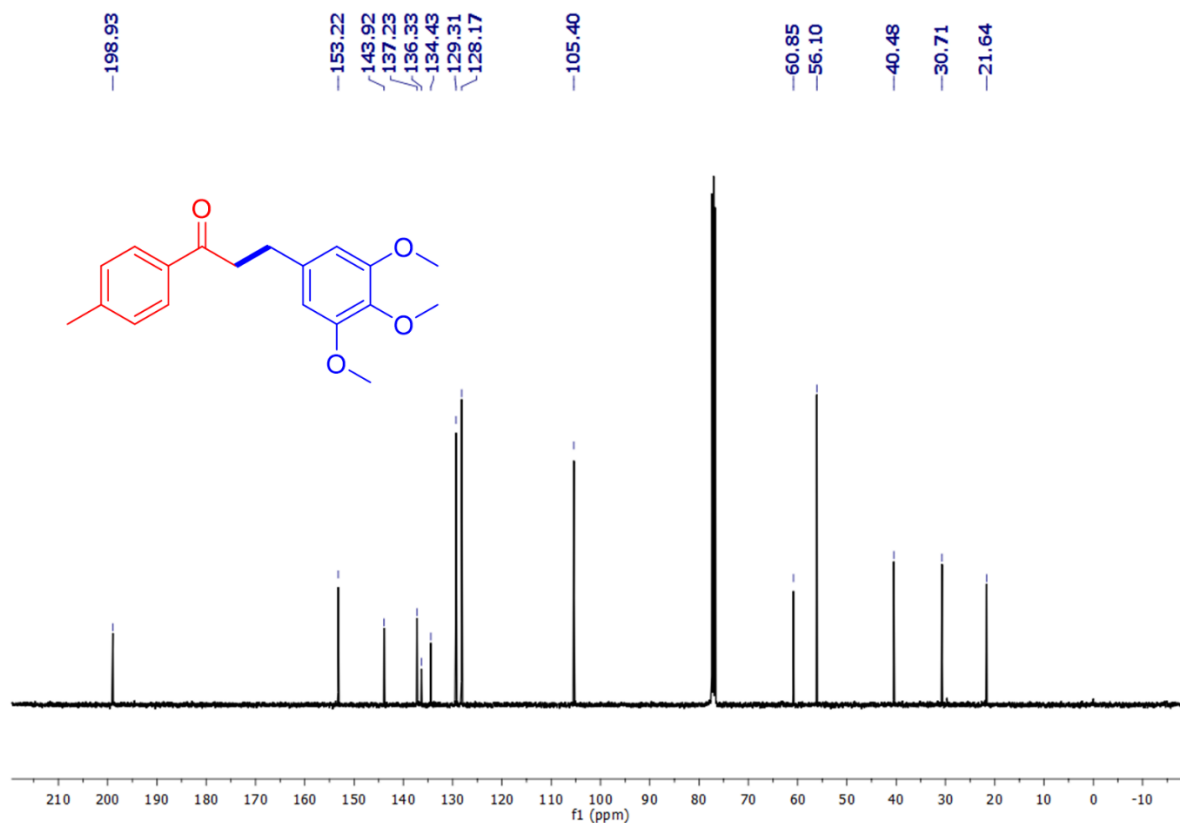

**Figure S43.** <sup>13</sup>C NMR spectrum of compound **3n** in CDCl<sub>3</sub> (100 MHz, 293 K).

# Supporting Information

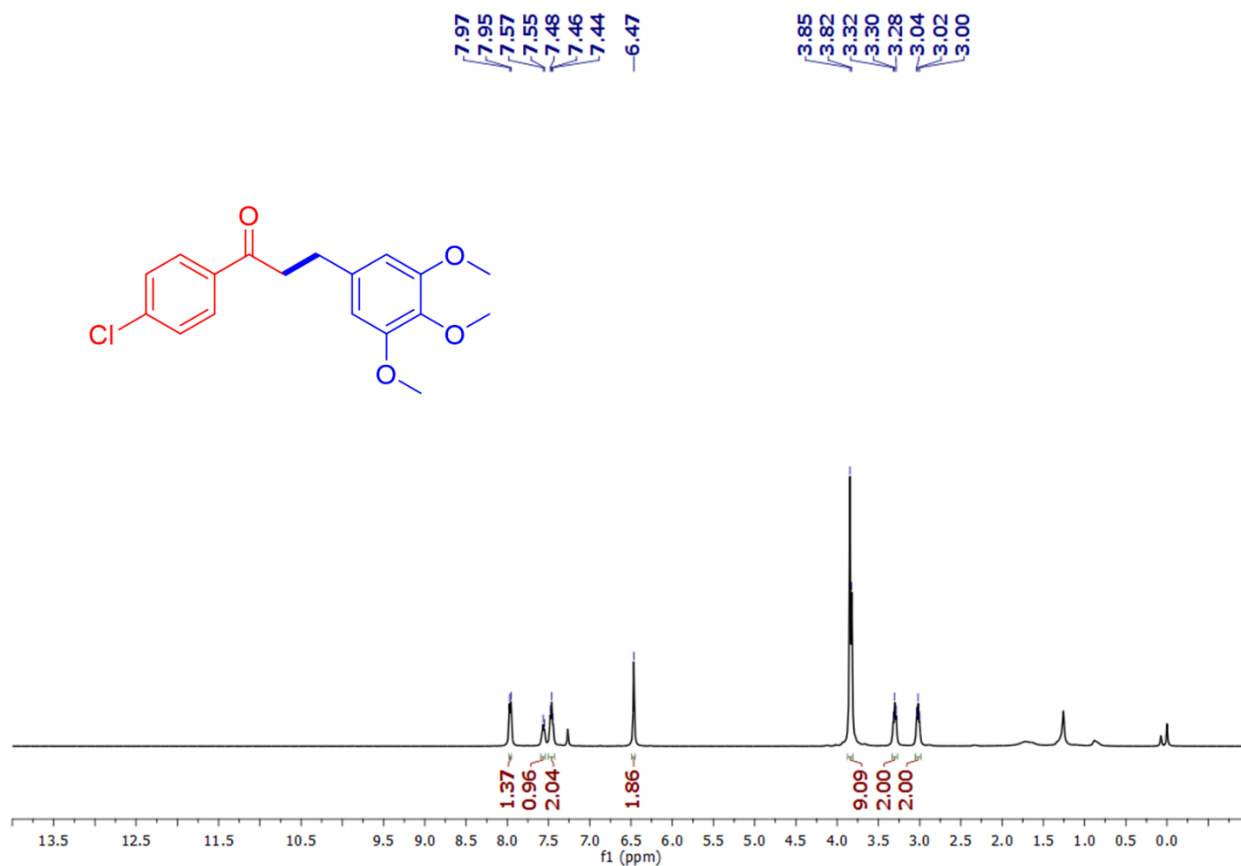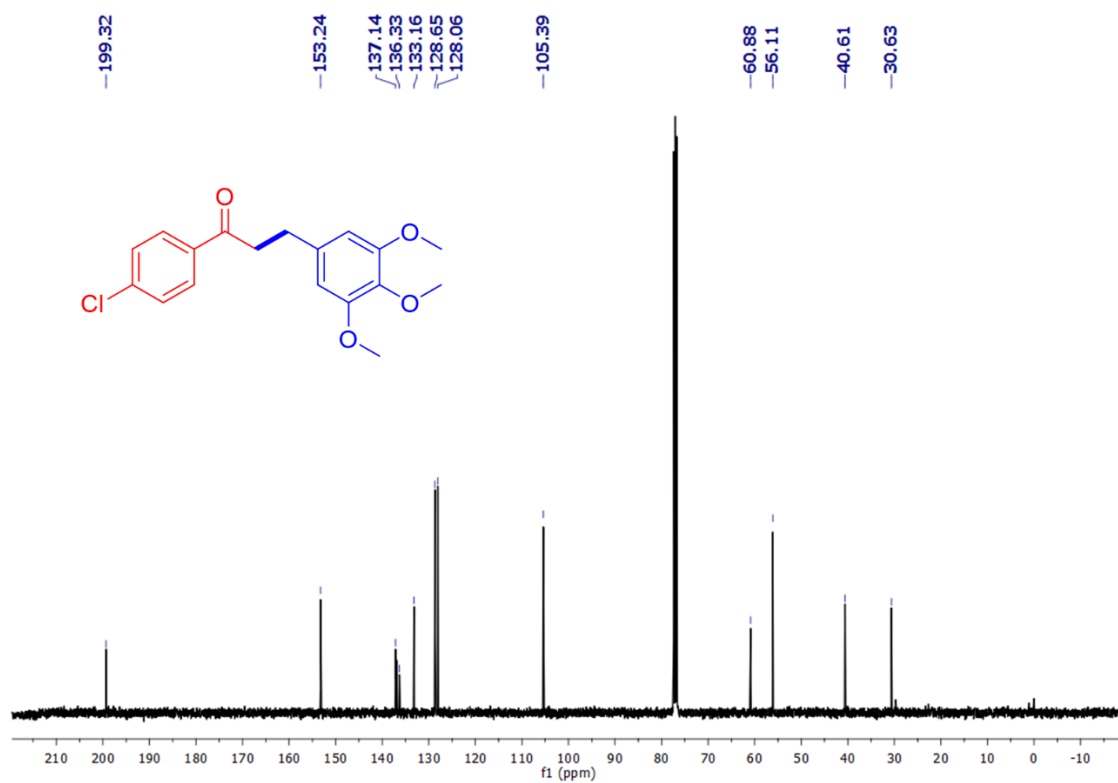

# Supporting Information

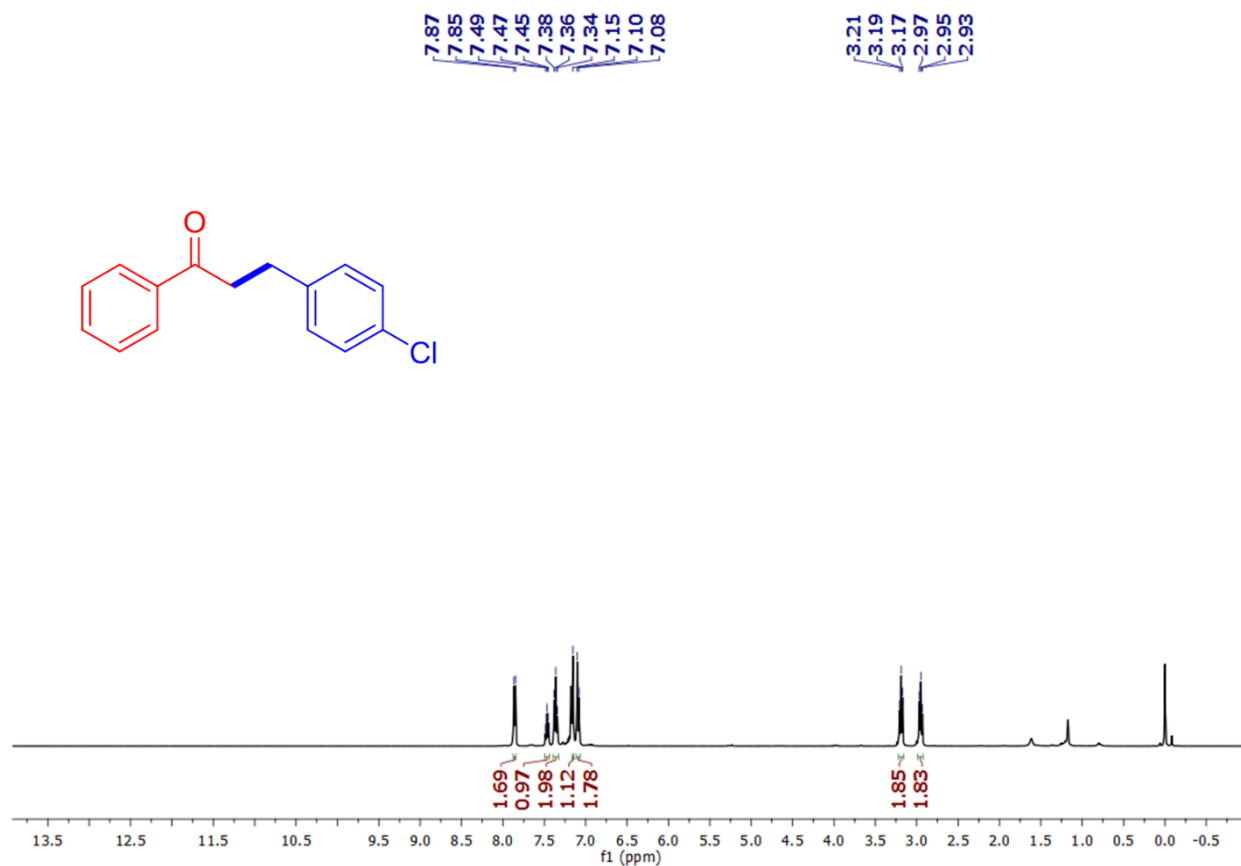

**Figure S46.** <sup>1</sup>H NMR spectrum of compound **3p** in CDCl<sub>3</sub> (400 MHz, 293 K).<sup>8</sup>

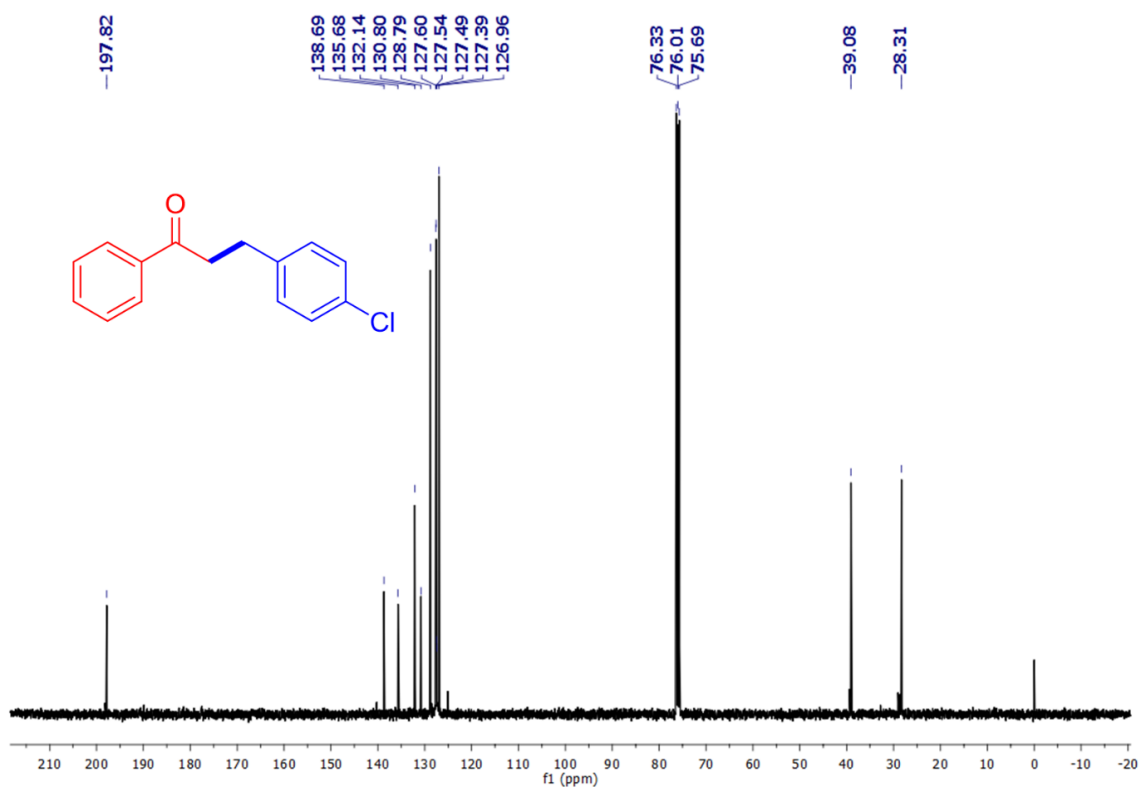

**Figure S47.** <sup>13</sup>C NMR spectrum of compound **3p** in CDCl<sub>3</sub> (100 MHz, 293 K).<sup>8</sup>

# Supporting Information

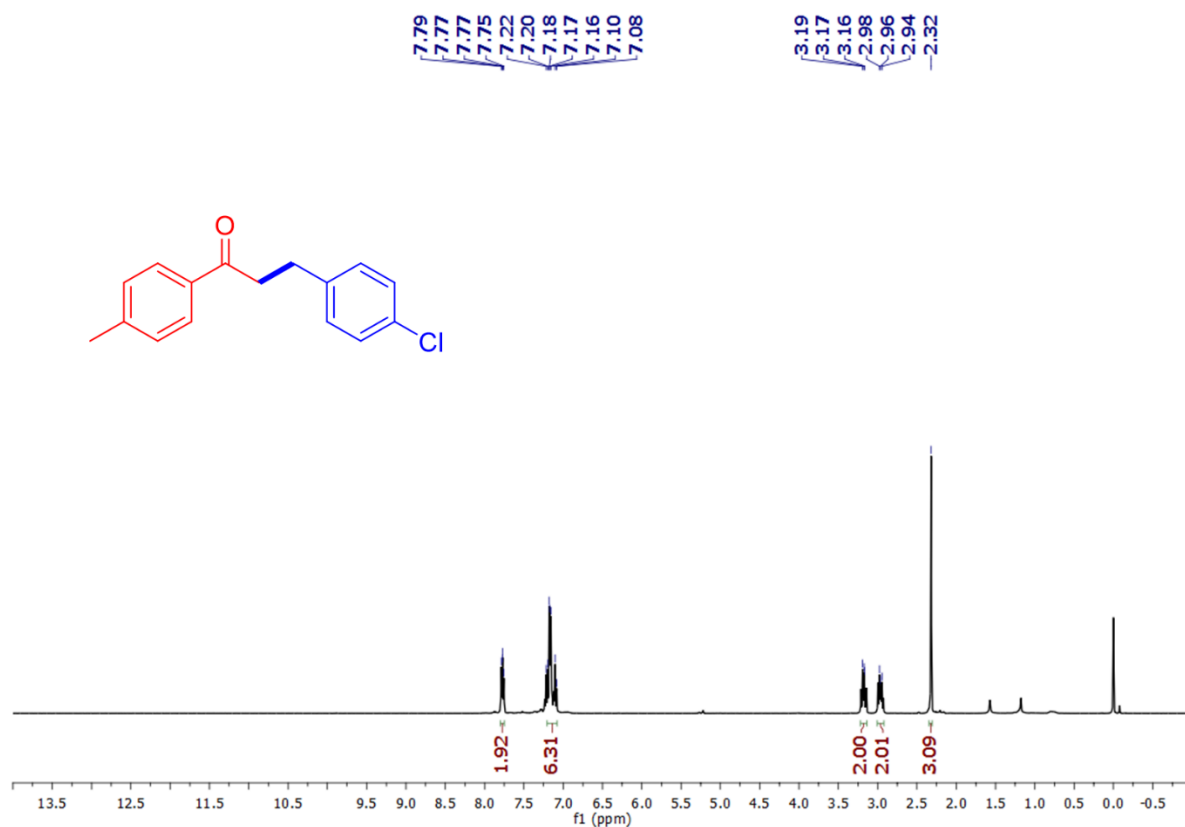

**Figure S48.**  $^1\text{H}$  NMR spectrum of compound **3q** in  $\text{CDCl}_3$  (400 MHz, 293 K).<sup>22</sup>

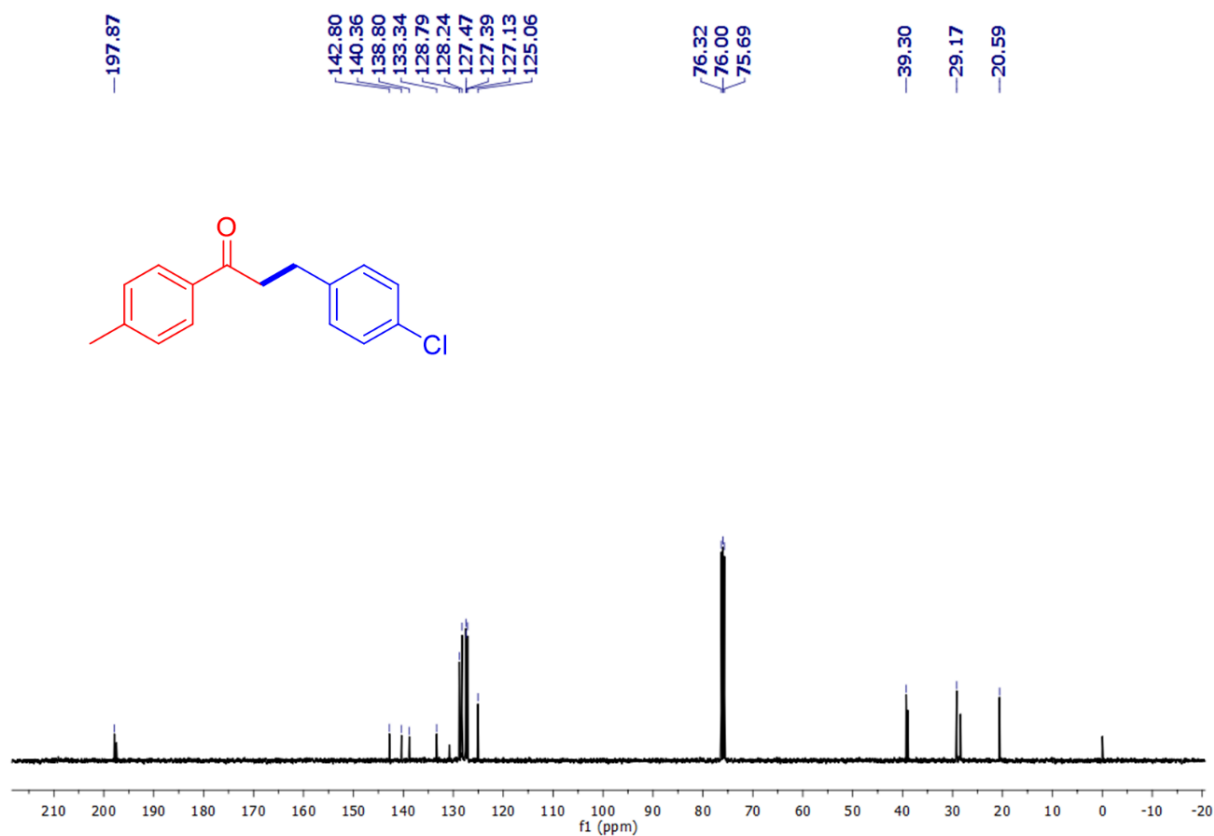

**Figure S49.**  $^{13}\text{C}$  NMR spectrum of compound **3q** in  $\text{CDCl}_3$  (100 MHz, 293 K).<sup>22</sup>



# Supporting Information

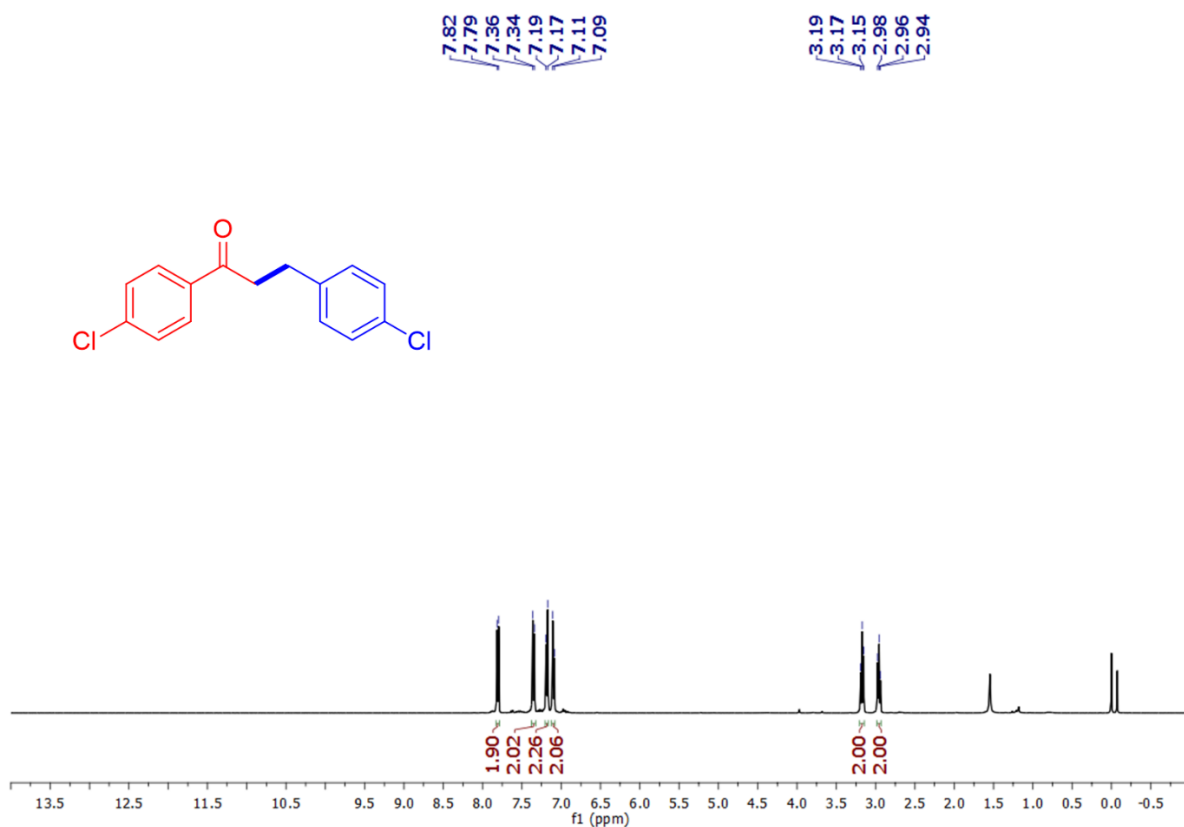

**Figure S50.** <sup>1</sup>H NMR spectrum of compound **3r** in CDCl<sub>3</sub> (400 MHz, 293 K).<sup>22</sup>

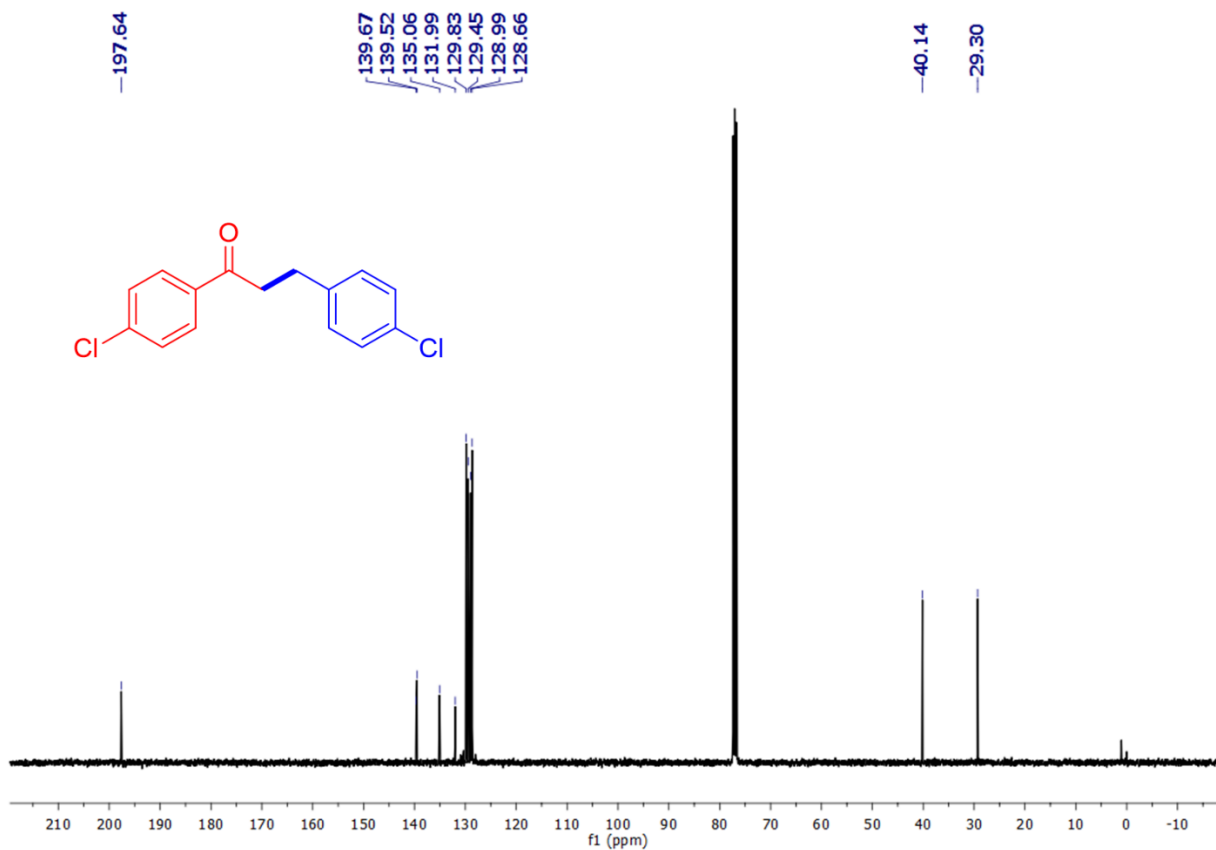

**Figure S51.** <sup>13</sup>C NMR spectrum of compound **3r** in CDCl<sub>3</sub> (100 MHz, 293 K).<sup>22</sup>

# Supporting Information

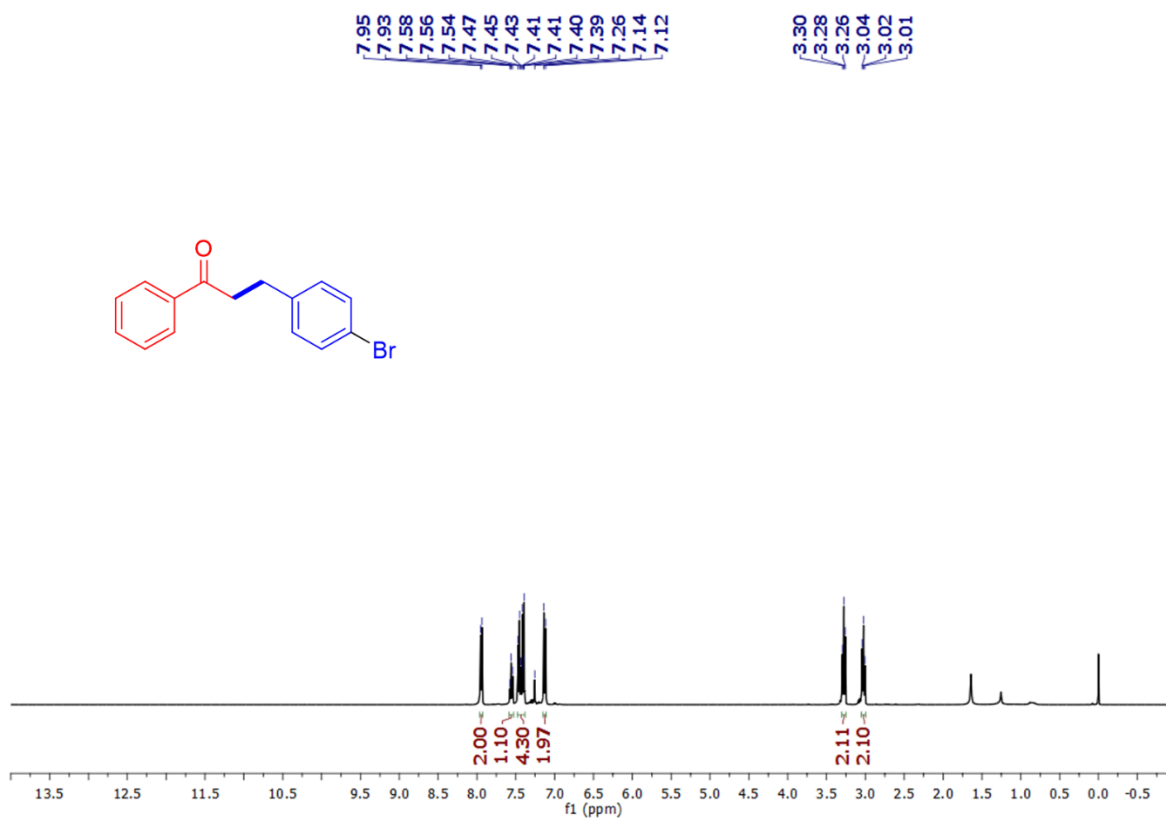

**Figure S52.** <sup>1</sup>H NMR spectrum of compound **3s** in CDCl<sub>3</sub> (400 MHz, 293 K).<sup>9</sup>

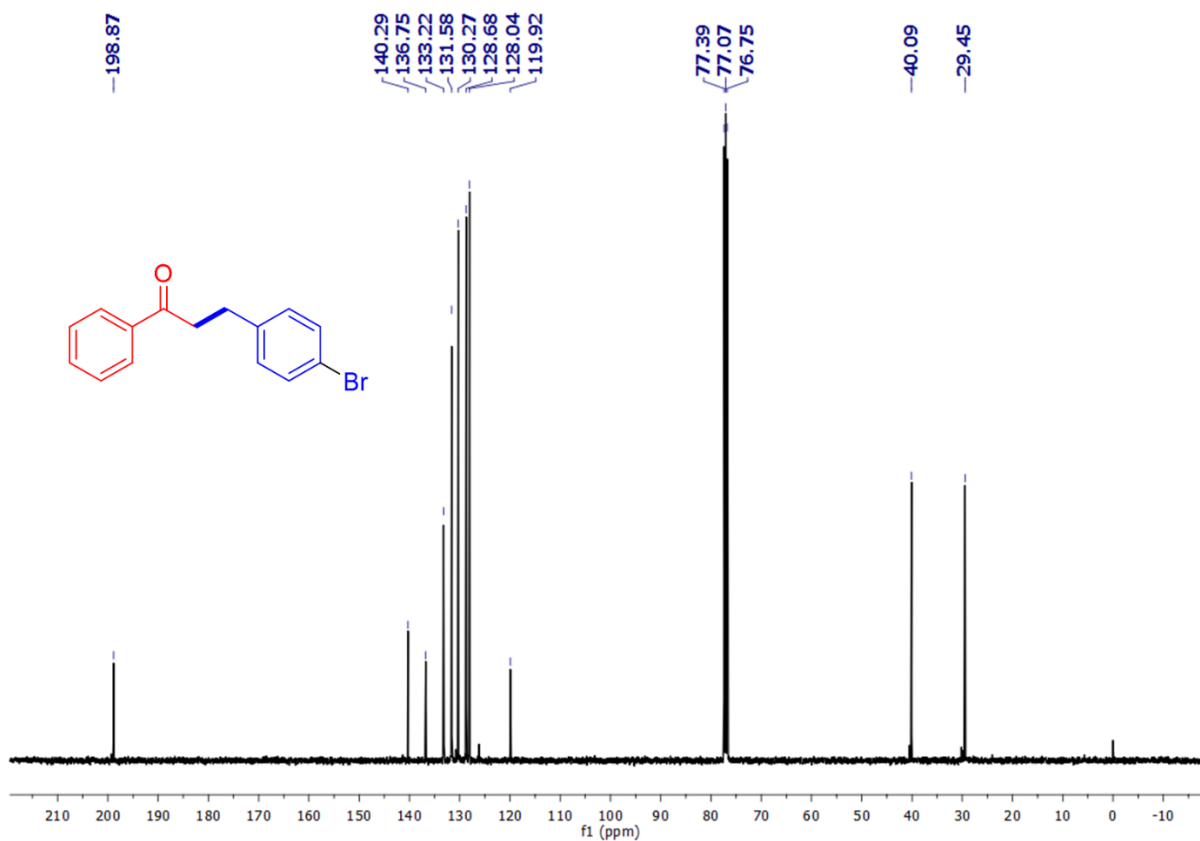

**Figure S53.** <sup>13</sup>C NMR spectrum of compound **3s** in CDCl<sub>3</sub> (100 MHz, 293 K).<sup>9</sup>

# Supporting Information

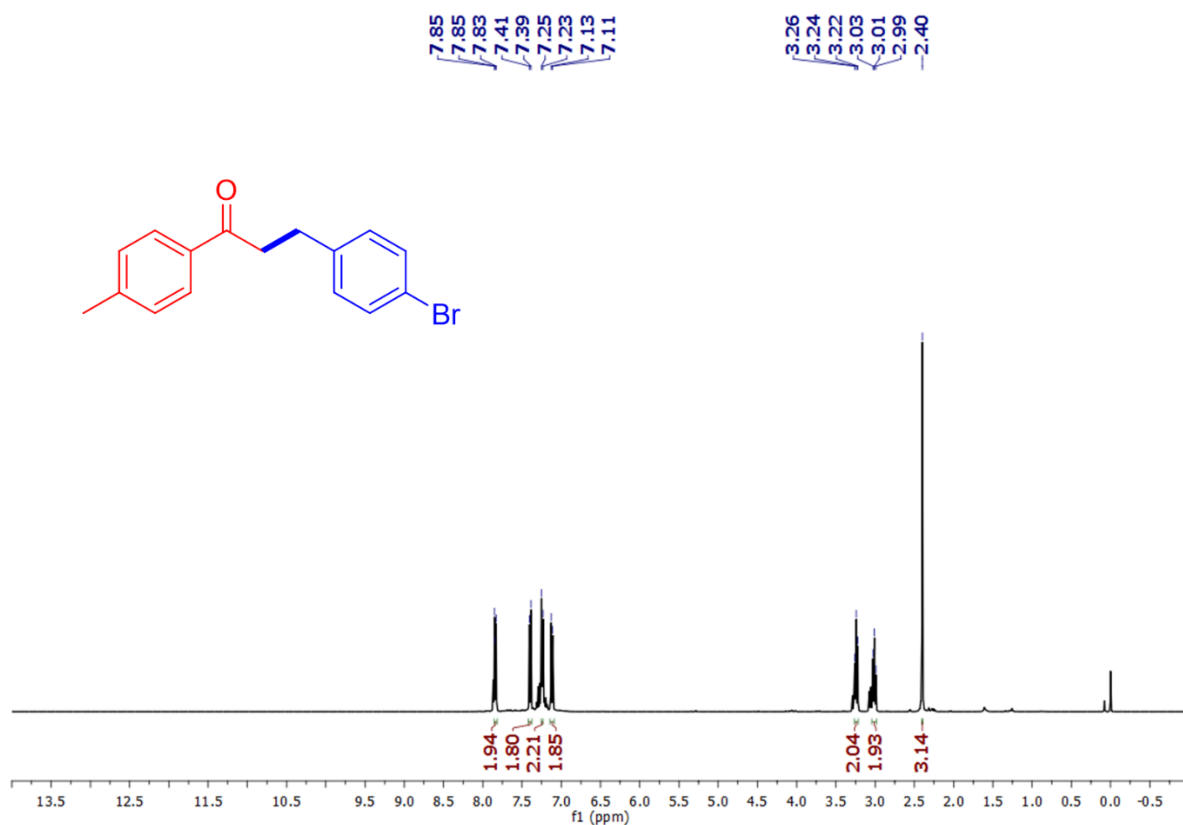

**Figure S54.** <sup>1</sup>H NMR spectrum of compound **3t** in CDCl<sub>3</sub> (400 MHz, 293 K).

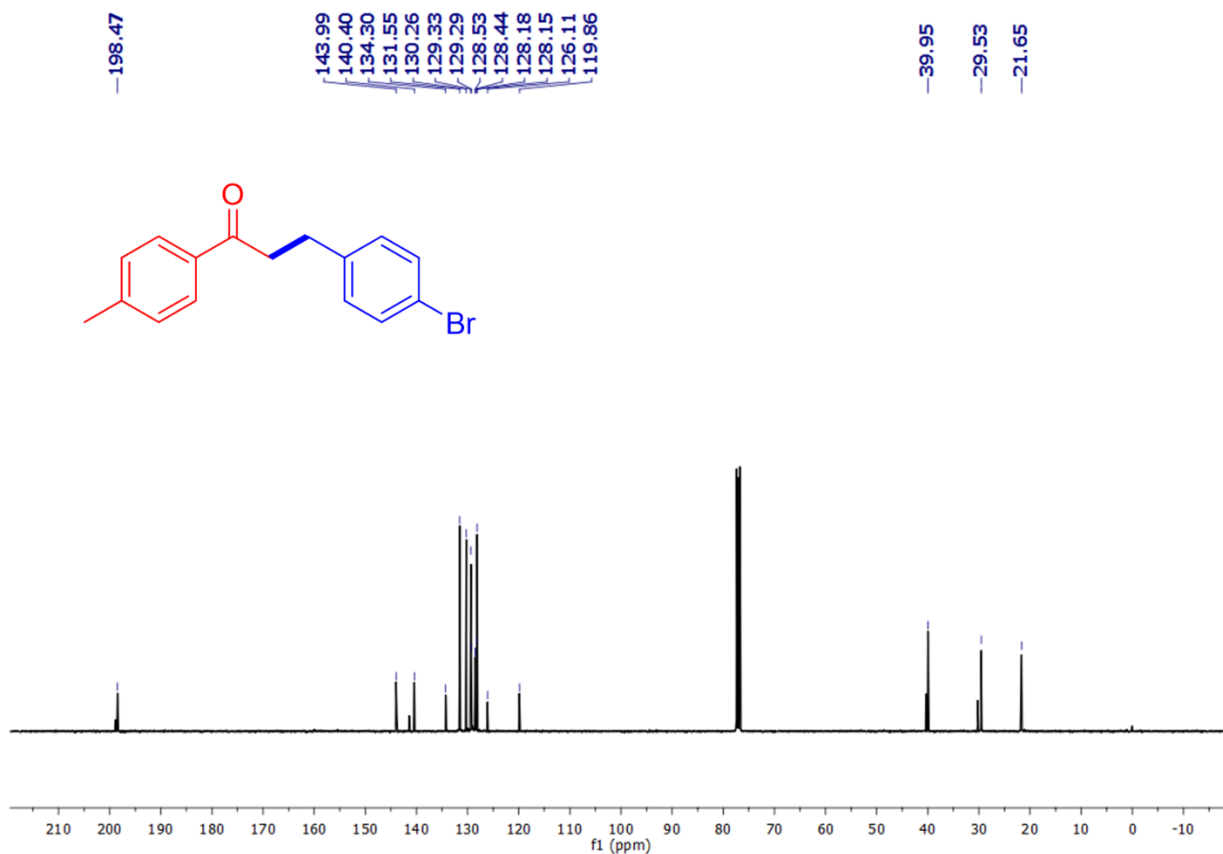

**Figure S55.** <sup>13</sup>C NMR spectrum of compound **3t** in CDCl<sub>3</sub> (100 MHz, 293 K).

# Supporting Information

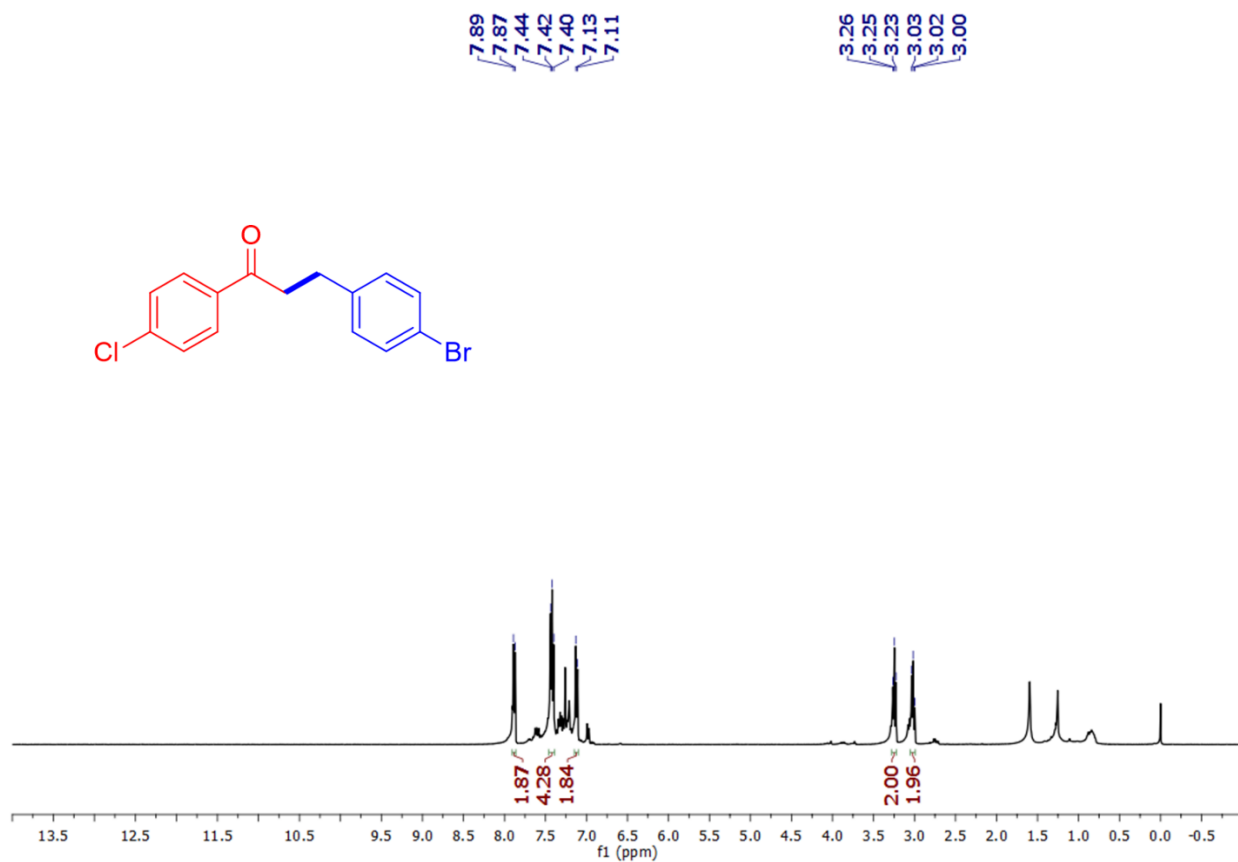

**Figure S56.** <sup>1</sup>H NMR spectrum of compound **3u** in CDCl<sub>3</sub> (400 MHz, 293 K).

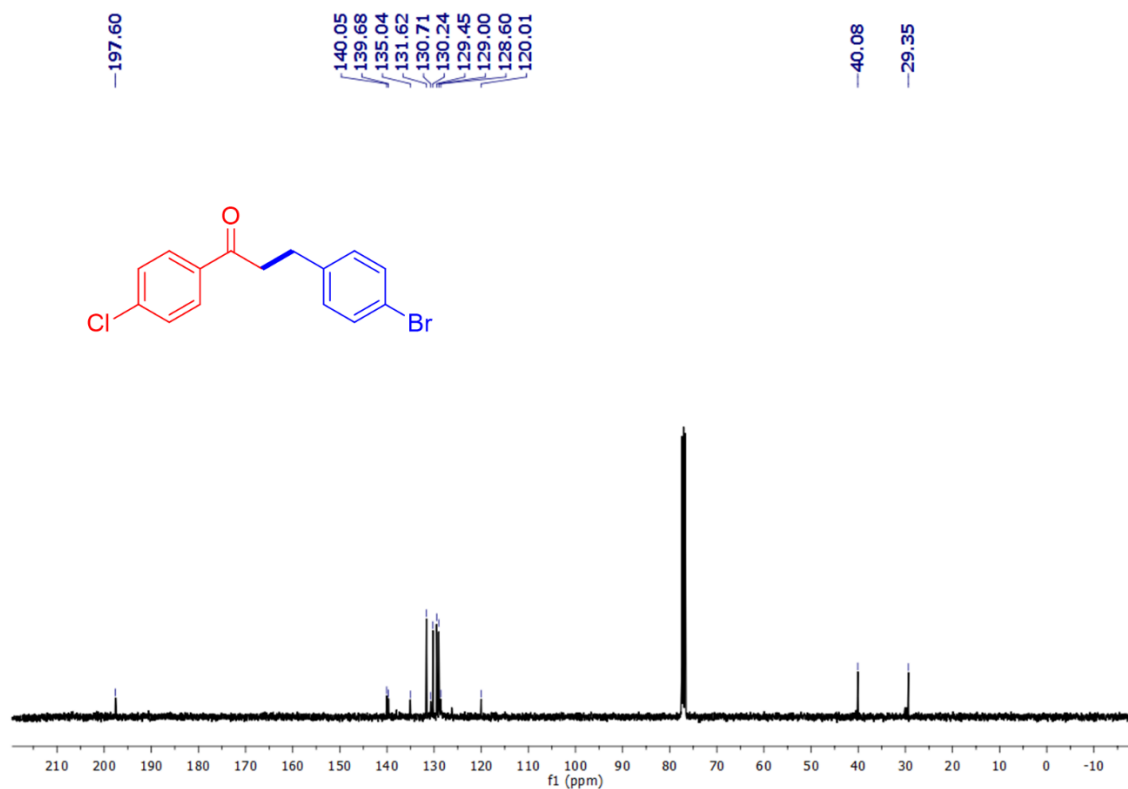

**Figure S57.** <sup>13</sup>C NMR spectrum of compound **3u** in CDCl<sub>3</sub> (100 MHz, 293 K).

# Supporting Information

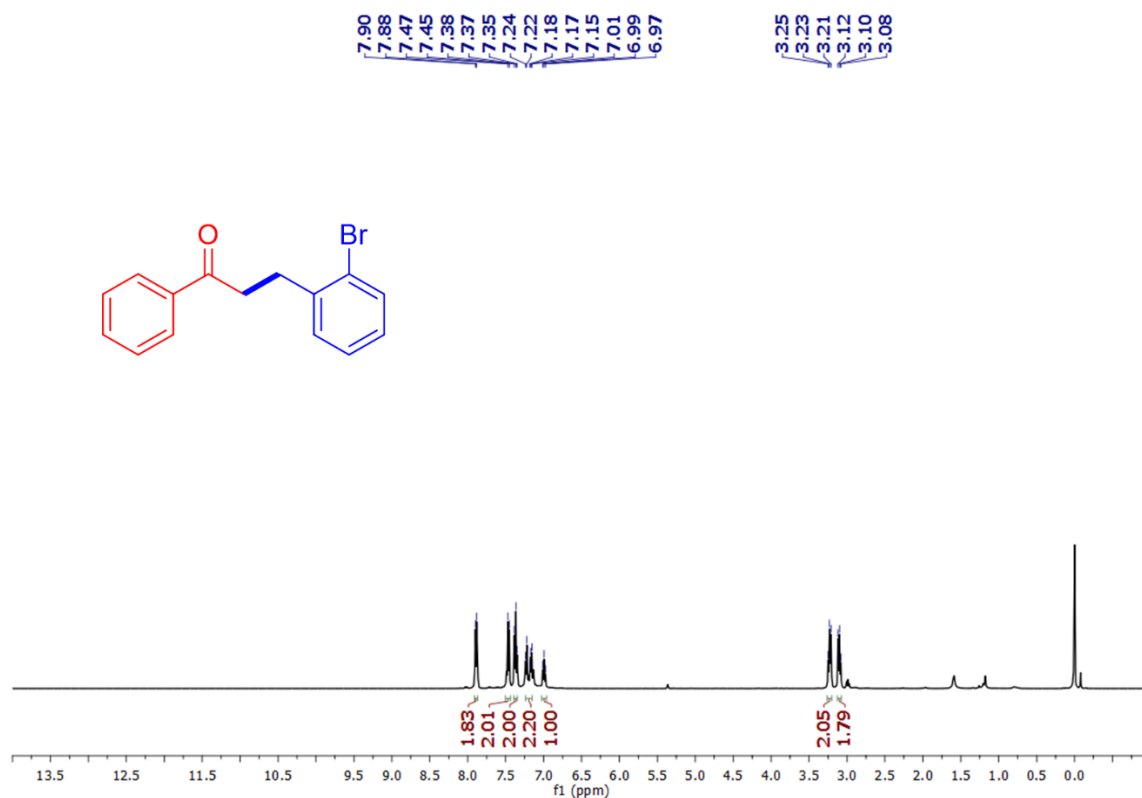

**Figure S58.** <sup>1</sup>H NMR spectrum of compound **3v** in CDCl<sub>3</sub> (400 MHz, 293 K).

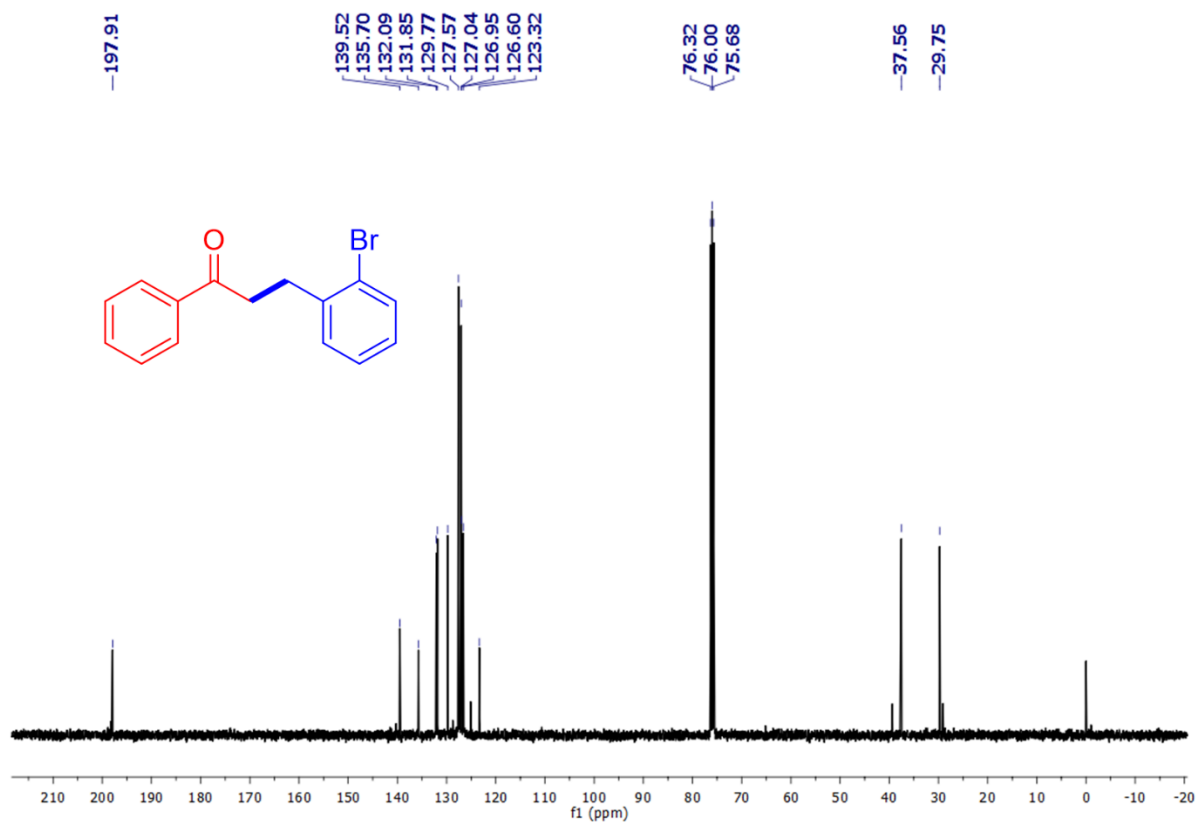

**Figure S59.** <sup>13</sup>C NMR spectrum of compound **3v** in CDCl<sub>3</sub> (100 MHz, 293 K).

# Supporting Information

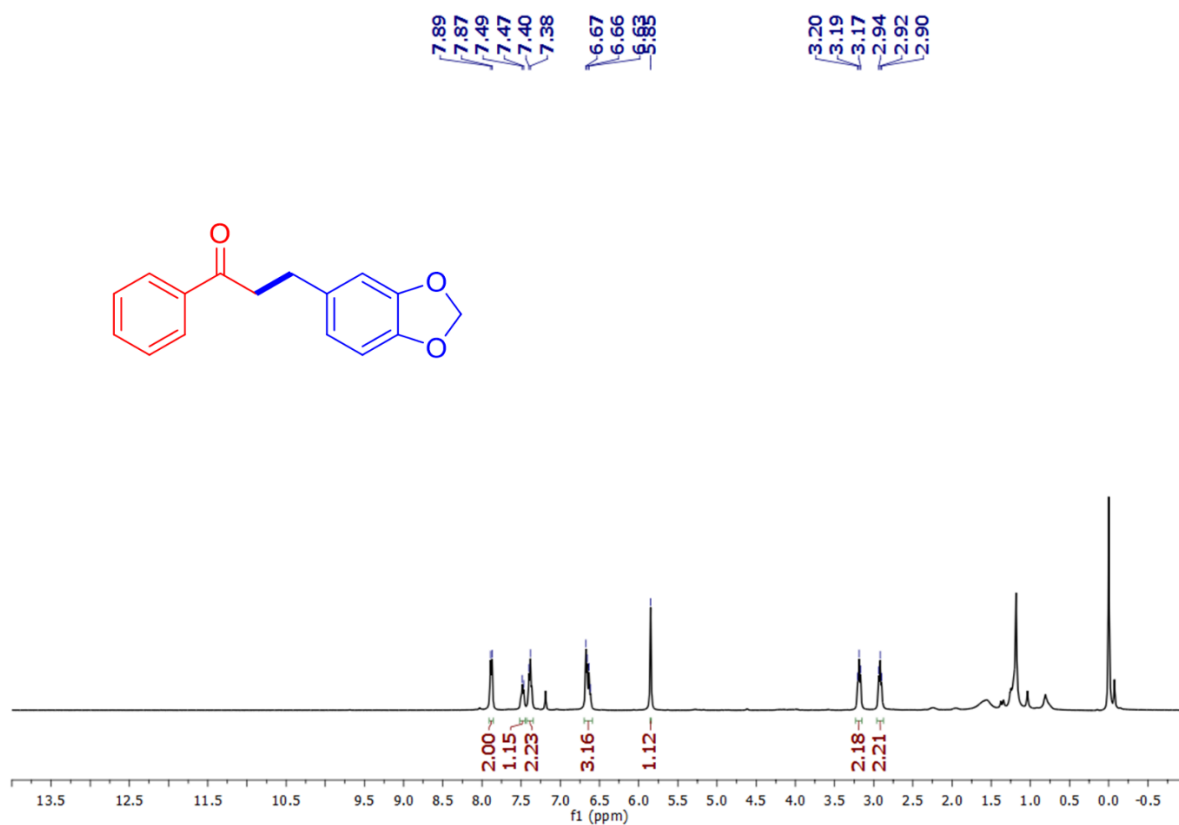

**Figure S60.**  $^1\text{H}$  NMR spectrum of compound **3w** in  $\text{CDCl}_3$  (400 MHz, 293 K).<sup>8</sup>

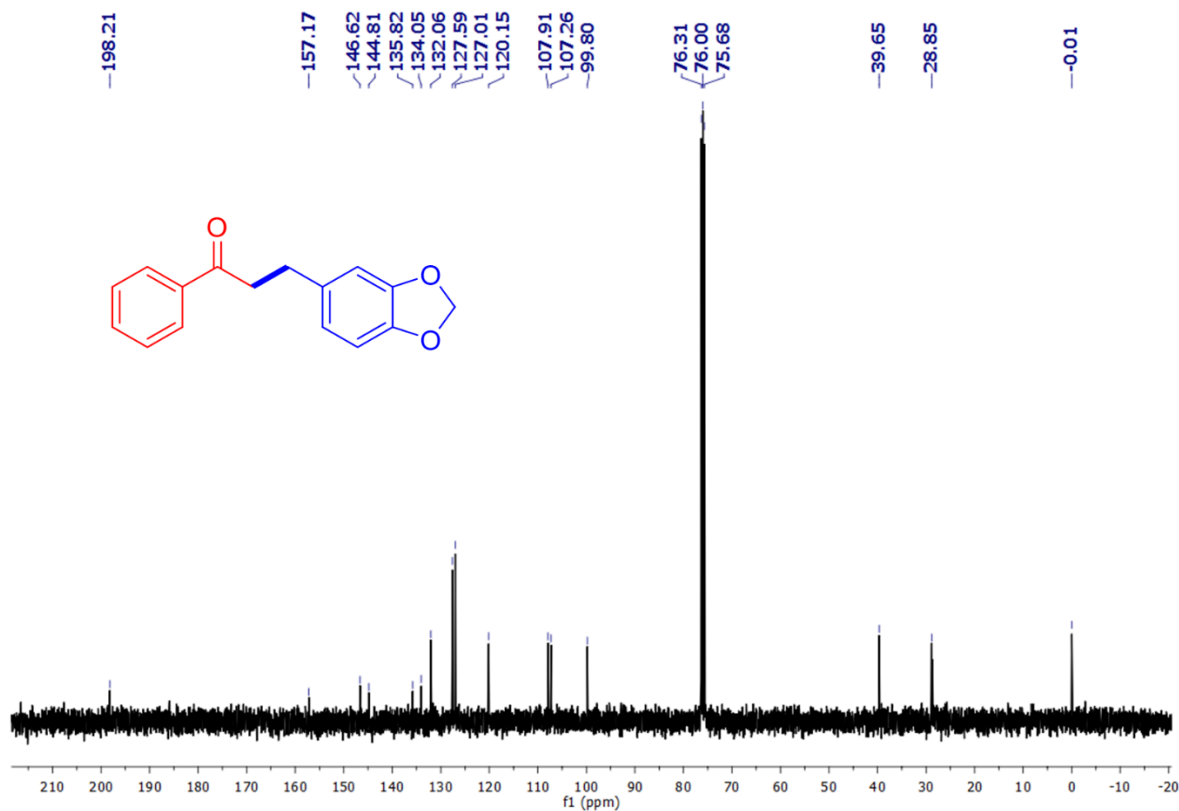

**Figure S61.**  $^{13}\text{C}$  NMR spectrum of compound **3w** in  $\text{CDCl}_3$  (100 MHz, 293 K).<sup>8</sup>

# Supporting Information

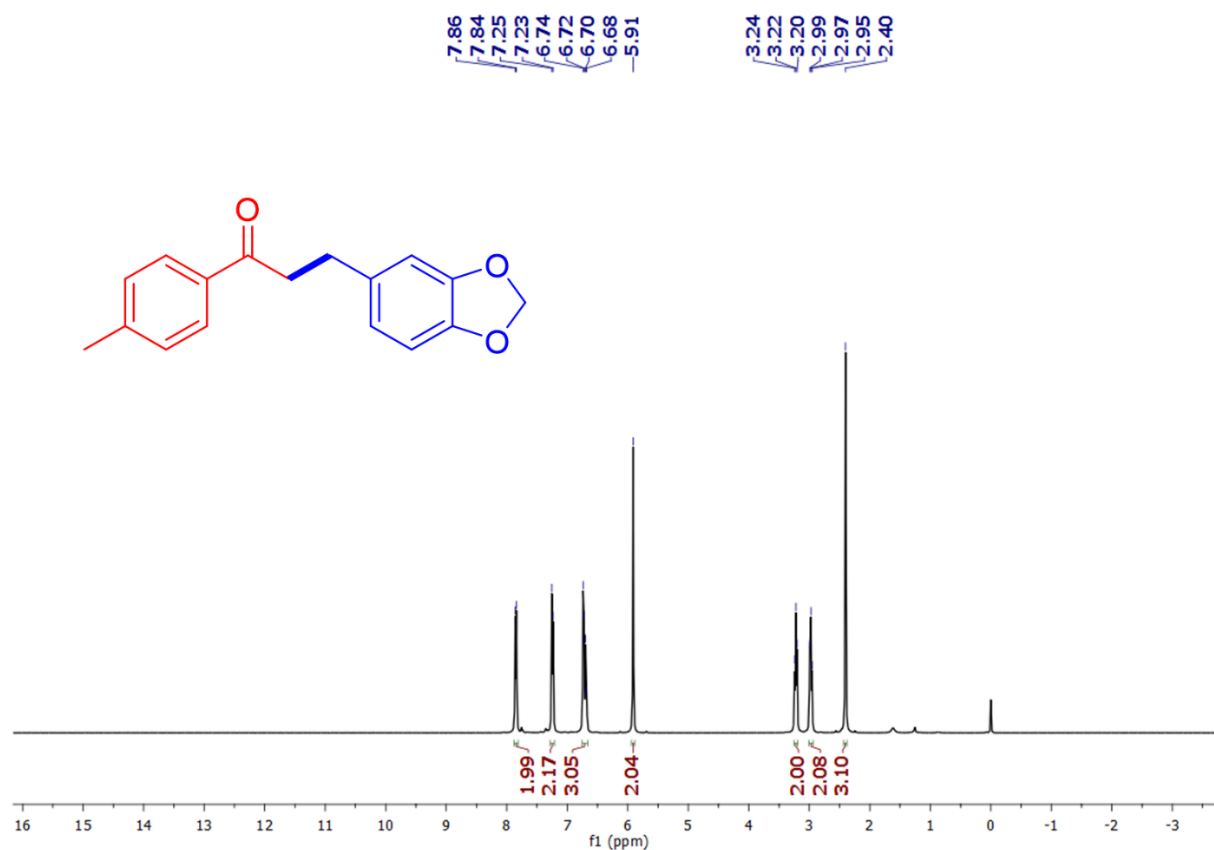

**Figure S62.**  $^1\text{H}$  NMR spectrum of compound **3x** in  $\text{CDCl}_3$  (400 MHz, 293 K).

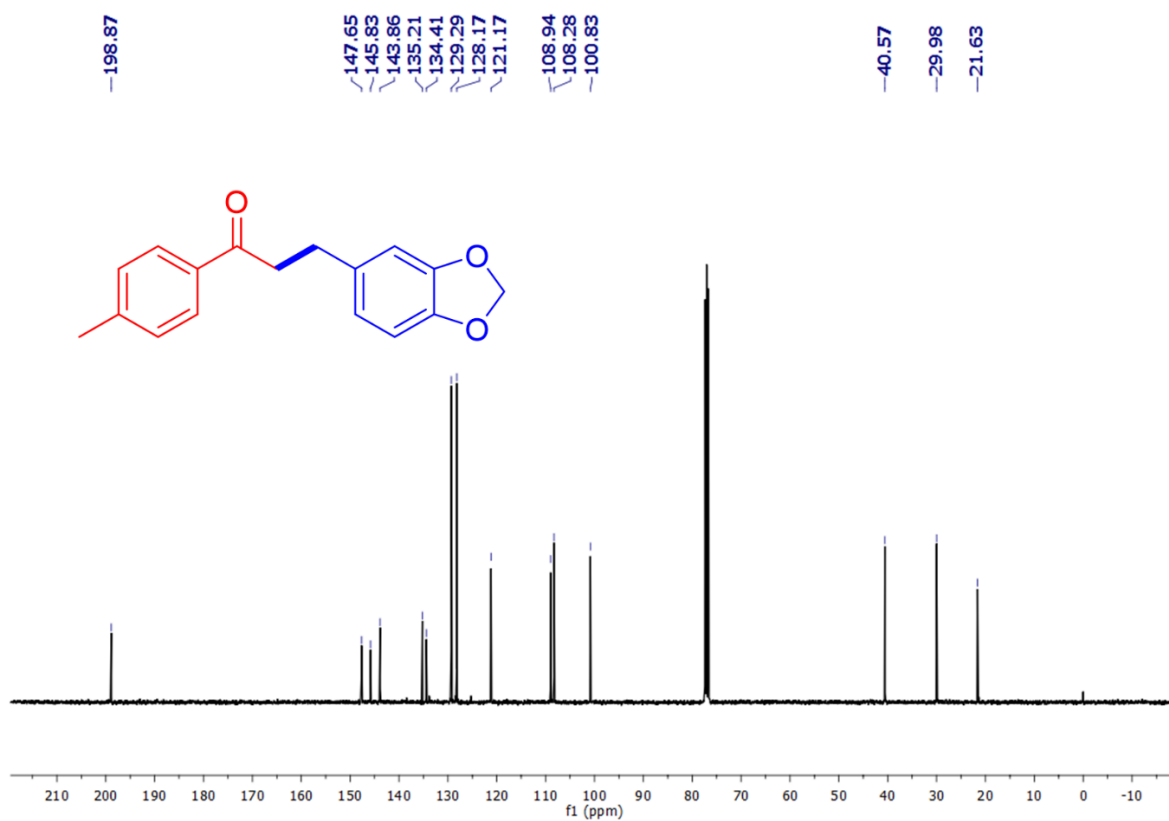

**Figure S63.**  $^{13}\text{C}$  NMR spectrum of compound **3x** in  $\text{CDCl}_3$  (100 MHz, 293 K).

# Supporting Information

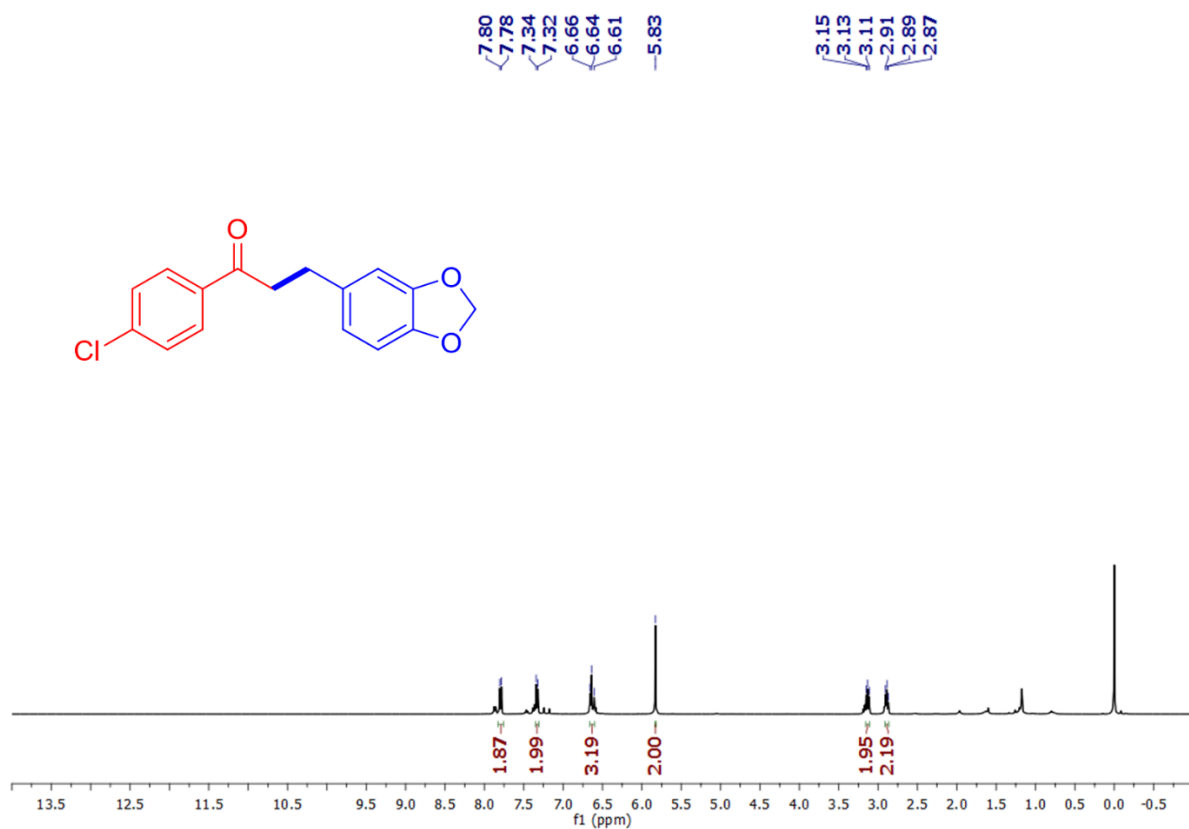

**Figure S64.** <sup>1</sup>H NMR spectrum of compound **3y** in CDCl<sub>3</sub> (400 MHz, 293 K).

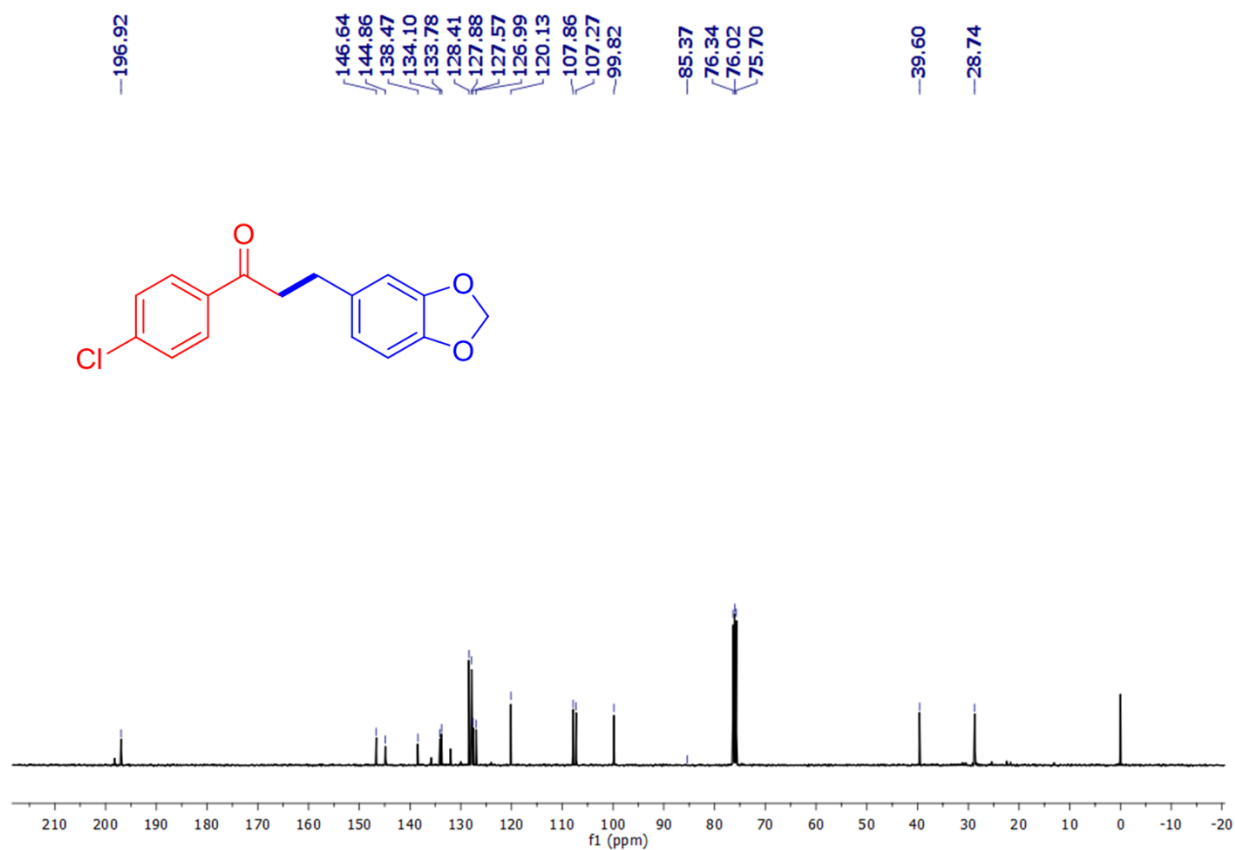

**Figure S65.** <sup>13</sup>C NMR spectrum of compound **3y** in CDCl<sub>3</sub> (100 MHz, 293 K)



# Supporting Information

## References:

1. A. I. Vogel, Test book of practical organic chemistry, Longman, London, 5th edn, 1989, 395.
2. G. M. Sheldrick, *Acta Crystallogr Section A*, 2008, **64**, 112-122.
3. L. Farrugia, ORTEP-3 for Windows - a version of ORTEP-III with a Graphical User Interface (GUI), *J. Appl. Crystallogr.*, 1997, **30**, 565-566.
4. W. Chang, X. Gong, S. Wang, L. P. Xiao, G. Song, *Org. Biomol. Chem.*, 2017, 15, 3466–3471.
5. A. Singh, A. Maji, M. Joshi, A. R. Choudhury and K. Ghosh, *Dalton Trans.*, 2021, 50, 8567-8587.
6. B. Pandey, S. Xu and K. Ding, *Org. Lett.* 2019, 21, 7420–7423.
7. R. Sharma, A. Mondal, A. Samanta, N. Biswas, B. Das, and D. Srimani, *Adv. Synth. Catal.*, 2022, 364, 2429-2437.
8. S. Genc, S. Günnaz, B. Çetinkaya, S. Gülcemal, D. Gülcemal, *J. Org. Chem.*, 2018, 83, 2875–2881.
